# Supplementary material for: Solvent-free and catalyst-free direct alkylation of alkenes
Source: Royal Society of Chemistry journal article supplement (doi:10.1039/d3gc02685j), 2023-01-01
Supplement: d3gc02685j1.pdf [file d3gc02685j1.pdf]

## Supplementary Materials for

### **Solvent-free and Catalyst-free Direct Alkylation of Alkenes**

Meng-Yao Li,<sup>a†</sup> Jiatong Li,<sup>a†</sup> Ao Gu,<sup>a</sup> Xiao-Mei Nong,<sup>a</sup> Shuyang Zhai,<sup>a</sup> Zhu-Ying Yue,<sup>a</sup>  
Chen-Guo Feng,<sup>b\*</sup> Yingbin Liu,<sup>a\*</sup> and Guo-Qiang Lin<sup>b</sup>

Corresponding authors:

Chen-Guo Feng, fengcg@shutcm.edu.cn;

Yingbin Liu, laoniulyb@shsmu.edu.cn

† These authors contributed equally to this work.

#### **Table of Contents**

**S1.** General Information

**S2.** Substrates list

**S3.** General procedures for alkylation of alkenes

**S4.** NMR characterization of substrate interactions

**S5.** Control experiments

**S6.** NMR Spectra

**S7.** References



## ***S1. General Information***

All the solvents were dried using standard procedure and distilled before use. All commercially available chemical resources were used as received unless otherwise stated. Reactions were monitored by thin layer chromatography (TLC) supplied by Yantai Jiangyou Silicon Material Company (China). Visualization was accomplished with UV light or basic aqueous phosphomolybdic acid (PMA). Chromatography was achieved using forced flow (flash chromatography) of the indicated solvent system on 300-400 mesh silica gel unless otherwise noted. Nuclear Magnetic Resonance (**NMR**) spectra were acquired on Agilent 400 or Bruker 400 instruments operating at 400, 100, and 376 MHz for  $^1\text{H}$ ,  $^{13}\text{C}$ , and  $^{19}\text{F}$ , respectively. Chemical shifts are reported in  $\delta$  ppm referenced to an internal  $\text{SiMe}_4$  standard (TMS:  $\delta$  0.000 ppm) for  $^1\text{H}$  **NMR**, chloroform-*d* ( $\delta$  77.16) for  $^{13}\text{C}$  **NMR** unless otherwise noted. Multiplicities are reported using the following abbreviations: s = singlet, d = doublet, t = triplet, q = quartet, quintet = quint, heptet = hept, m = multiplet, br = broad resonance. High-resolution mass spectra (**HRMS**) and Low-resolution mass spectrometry (**LRMS**) were acquired through the National Center for Organic Mass Spectrometry in Shanghai, Shanghai Institute of Organic Chemistry (CAS) and determined on a Waters Micromass GCT Premier spectrometer. The alkene substrates **1a**, **1l** and the halide substrates **2a-2f**, **2h**, **2k**, **2m-2q**, **2t**, **2z**, **2A** were commercially available. The alkene substrates<sup>1-5</sup> **1b-1k** and the chloride substrates<sup>6-7</sup> **2g**, **2i**, **2j**, **2l**, **2u-2y** were prepared according to the literatures.



## S2. Substrates list

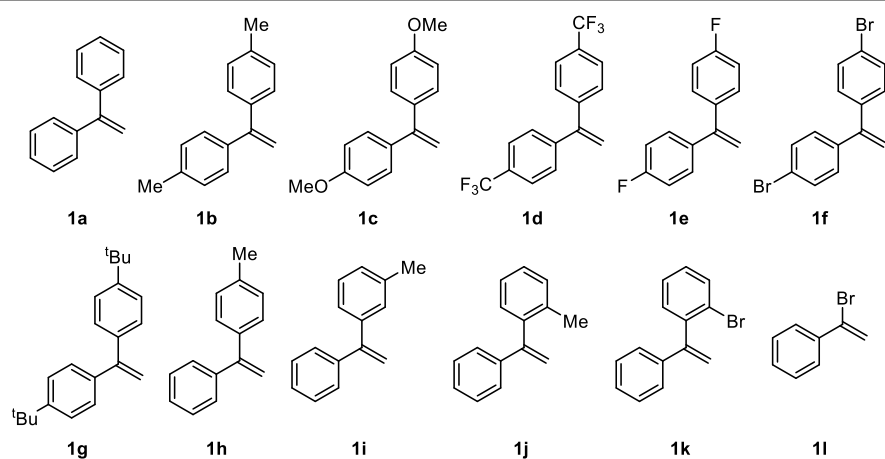

Scheme S1. Alkene substrates list.

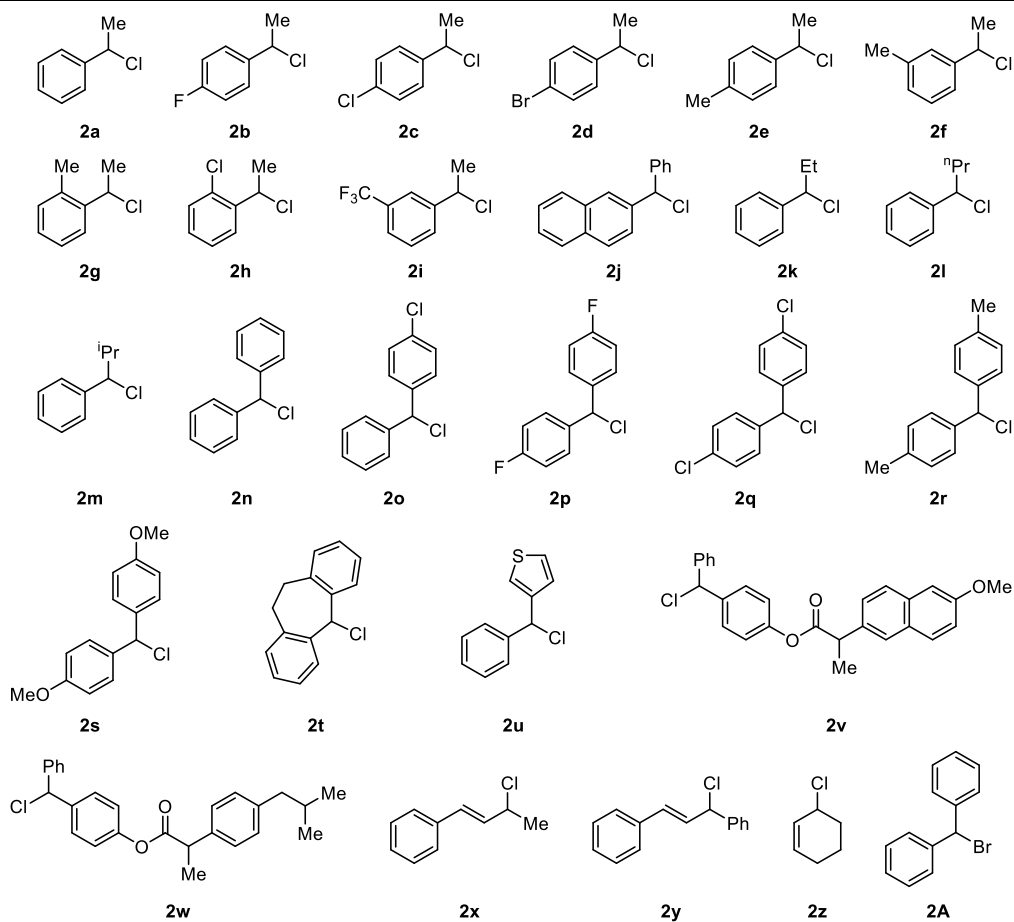

Scheme S2. Halide substrates list.



### S3. General procedures for alkylation of alkenes

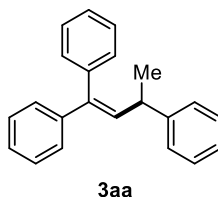

**but-1-ene-1,1,3-triyltribenzene (3aa)**, white solid (90% yield),  $R_f = 0.34$  (silica, petroleum ether, UV and  $\text{KMnO}_4$  detection).

To an oven-dried, 10 mL Teflon-lined screw-capped Pyrex test tube, **1a** (0.6 mmol) and **2a** (0.66 mmol) were added without argon protection. A magnetic stir bar was added to the tube carefully and the mixture was stirred slowly for 5 min at room temperature. Then the temperature was increased to 80 °C and the stir was continued for 3 h. After it cooled down to room temperature, it was purified by flash chromatography on silica gel to afford a pure product.

$^1\text{H NMR}$  (400 MHz,  $\text{CDCl}_3$ )  $\delta$  7.47-7.10 (m, 13H), 6.20 (d,  $J = 10.3$  Hz, 1H), 3.59 (dq,  $J = 10.3, 7.0$  Hz, 1H), 1.37 (d,  $J = 6.9$  Hz, 3H) ppm;  $^{13}\text{C NMR}$  (100 MHz,  $\text{CDCl}_3$ )  $\delta$  146.33, 142.51, 140.27, 140.22, 134.30, 129.96, 128.63, 128.40, 128.22, 127.40, 127.20, 127.13, 127.08, 126.14, 39.43, 22.49 ppm.

**EI-MS**  $m/z$  (%): 284 ( $\text{M}^+$ ); **HRMS** (EI):  $m/z$  Exact mass calcd for  $\text{C}_{22}\text{H}_{20}$  [ $\text{M}$ ] $^+$ : 284.1560, found: 284.1564.

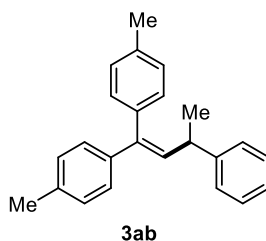

**4,4'-(3-phenylbut-1-ene-1,1-diyl)bis(methylbenzene) (3ab)**, colorless oil (85% yield),  $R_f = 0.32$  (silica, petroleum ether, UV and  $\text{KMnO}_4$  detection).

To an oven-dried, 10 mL Teflon-lined screw-capped Pyrex test tube, **1b** (0.6 mmol) and **2a** (0.66 mmol) were added without argon protection. A magnetic stir bar was added to the tube carefully and the mixture was stirred slowly for 5 min at room temperature. Then the temperature was increased to 80 °C and the stir was continued



for 3 h. After it cooled down to room temperature, it was purified by flash chromatography on silica gel to afford a pure product.

**<sup>1</sup>H NMR** (400 MHz, CDCl<sub>3</sub>) δ 7.35-7.24 (m, 2H), 7.24-7.14 (m, 5H), 7.13-7.02 (m, 6H), 6.14 (d, *J* = 10.3 Hz, 1H), 3.60 (dq, *J* = 10.3, 6.9 Hz, 1H), 2.38 (s, 3H), 2.30 (s, 3H), 1.37 (d, *J* = 6.9 Hz, 3H) ppm; **<sup>13</sup>C NMR** (100 MHz, CDCl<sub>3</sub>) δ 146.59, 140.03, 139.99, 137.40, 136.80, 136.70, 133.31, 129.84, 129.03, 128.89, 128.57, 127.33, 127.10, 126.04, 39.39, 22.59, 21.40, 21.18 ppm.

**EI-MS** *m/z* (%): 374 (M<sup>+</sup>); **HRMS** (EI): *m/z* Exact mass calcd for C<sub>29</sub>H<sub>26</sub> [M]<sup>+</sup>: 374.2020, found: 374.2031.

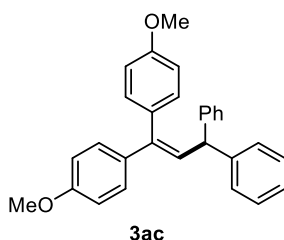

**4,4'-(3,3-diphenylprop-1-ene-1,1-diyl)bis(methoxybenzene) (3ac)**, colorless oil (94% yield), *R<sub>f</sub>* = 0.30 (silica, petroleum ether/ethyl acetate = 50:1 *v/v*, UV and KMnO<sub>4</sub> detection).

To an oven-dried, 10 mL Teflon-lined screw-capped Pyrex test tube, **1c** (0.6 mmol) and **2n** (0.66 mmol) were added without argon protection. A magnetic stir bar was added to the tube carefully and the mixture was stirred slowly for 5 min at room temperature. Then the temperature was increased to 100 °C and the stir was continued for 5 h. After it cooled down to room temperature, it was purified by flash chromatography on silica gel to afford a pure product.

**<sup>1</sup>H NMR** (400 MHz, CDCl<sub>3</sub>) δ 7.30-7.24 (m, 4H), 7.22-7.14 (m, 8H), 7.12-7.04 (m, 2H), 6.93-6.85 (m, 2H), 6.83-6.76 (m, 2H), 6.40 (d, *J* = 10.5 Hz, 1H), 4.82 (d, *J* = 10.5 Hz, 1H), 3.83 (s, 3H), 3.78 (s, 3H) ppm; **<sup>13</sup>C NMR** (100 MHz, CDCl<sub>3</sub>) δ 159.07, 158.87, 144.98, 140.77, 135.46, 132.32, 131.06, 129.31, 128.80, 128.65, 128.60, 128.50, 127.72, 126.67, 126.29, 113.74, 113.58, 77.48, 77.16, 76.84, 55.43, 55.37, 50.71 ppm.

**EI-MS** *m/z* (%): 406 (M<sup>+</sup>); **HRMS** (EI): *m/z* Exact mass calcd for C<sub>29</sub>H<sub>26</sub>O<sub>2</sub> [M]<sup>+</sup>: 406.1927, found: 406.1937.



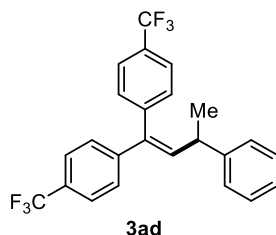

**4,4'-(3-phenylbut-1-ene-1,1-diyl)bis((trifluoromethyl)benzene) (3ad)**, white solid (69% yield),  $R_f = 0.33$  (silica, petroleum ether, UV and  $\text{KMnO}_4$  detection).

To an oven-dried, 10 mL Teflon-lined screw-capped Pyrex test tube, **1d** (0.6 mmol) and **2a** (1.8 mmol) were added without argon protection. A magnetic stir bar was added to the tube carefully and the mixture was stirred slowly for 5 min at room temperature. Then the temperature was increased to 120 °C and the stir was continued for 5 h. After it cooled down to room temperature, it was purified by flash chromatography on silica gel to afford a pure product.

$^1\text{H NMR}$  (400 MHz,  $\text{CDCl}_3$ )  $\delta$  7.67 (d,  $J = 8.2$  Hz, 2H), 7.51 (d,  $J = 8.4$  Hz, 2H), 7.37-7.25 (m, 6H), 7.25-7.20 (m, 1H), 7.20-7.14 (m, 2H), 6.36 (d,  $J = 10.5$  Hz, 1H), 3.54 (dq,  $J = 10.3, 6.7$  Hz, 1H), 1.41 (d,  $J = 6.9$  Hz, 3H) ppm;  $^{13}\text{C NMR}$  (100 MHz,  $\text{CDCl}_3$ )  $\delta$  145.38, 145.14, 143.18, 138.15, 137.33, 130.28, 129.92 (q,  $J = 32.3$  Hz), 129.48 (q,  $J = 32.2$  Hz), 128.89, 127.60, 126.95, 126.57, 125.67 (q,  $J = 3.8$  Hz), 125.37 (q,  $J = 3.8$  Hz), 124.28 (q,  $J = 270.7$  Hz), 39.68, 22.48 ppm;  $^{19}\text{F NMR}$  (376 MHz,  $\text{CDCl}_3$ )  $\delta$  -62.54, -62.55 ppm.

**EI-MS**  $m/z$  (%): 420 ( $\text{M}^+$ ); **HRMS** (EI):  $m/z$  Exact mass calcd for  $\text{C}_{24}\text{H}_{18}\text{F}_6$  [ $\text{M}$ ] $^+$ : 420.1307, found: 420.1313.

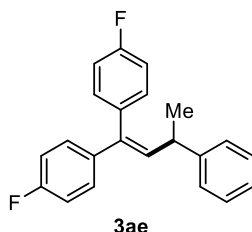

**4,4'-(3-phenylbut-1-ene-1,1-diyl)bis(fluorobenzene) (3ae)**, white solid (74% yield),  $R_f = 0.33$  (silica, petroleum ether, UV and  $\text{KMnO}_4$  detection).

To an oven-dried, 10 mL Teflon-lined screw-capped Pyrex test tube, **1e** (0.6 mmol) and **2a** (1.8 mmol) were added without argon protection. A magnetic stir bar was added to the tube carefully and the mixture was stirred slowly for 5 min at room temperature.



Then the temperature was increased to 120 °C and the stir was continued for 5 h. After it cooled down to room temperature, it was purified by flash chromatography on silica gel to afford a pure product.

**<sup>1</sup>H NMR** (400 MHz, CDCl<sub>3</sub>) δ 7.36-7.26 (m, 2H), 7.23-7.02 (m, 9H), 6.99-6.89 (m, 2H), 6.15 (d, *J* = 10.3 Hz, 1H), 3.55 (dq, *J* = 10.3, 6.9 Hz, 1H), 1.38 (d, *J* = 6.9 Hz, 3H); **<sup>13</sup>C NMR** (100 MHz, CDCl<sub>3</sub>) δ 162.28 (d, *J* = 245.2 Hz), 162.19 (d, *J* = 245.2 Hz), 146.12, 138.50 (d, *J* = 3.1 Hz), 138.39, 135.87 (d, *J* = 3.4 Hz), 134.52 (d, *J* = 1.5 Hz), 131.47 (d, *J* = 8.0 Hz), 128.93 (d, *J* = 8.0 Hz), 128.73, 126.99, 126.29, 115.47 (d, *J* = 21.0 Hz), 115.10 (d, *J* = 21.4 Hz), 39.55, 22.61 ppm; **<sup>19</sup>F NMR** (376 MHz, CDCl<sub>3</sub>) δ -114.99, -115.56 ppm.

**EI-MS** *m/z* (%): 320 (M<sup>+</sup>); **HRMS** (EI): *m/z* Exact mass calcd for C<sub>22</sub>H<sub>18</sub>F<sub>2</sub> [M]<sup>+</sup>: 320.1371, found: 320.1365.

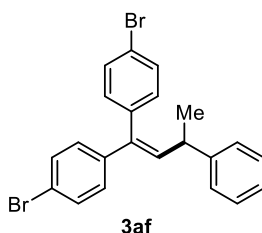

**4,4'-(3-phenylbut-1-ene-1,1-diyl)bis(bromobenzene) (3af)**, white solid (66% yield), *R<sub>f</sub>* = 0.31 (silica, petroleum ether, UV and KMnO<sub>4</sub> detection).

To an oven-dried, 10 mL Teflon-lined screw-capped Pyrex test tube, **1f** (0.6 mmol) and **2a** (1.2 mmol) were added without argon protection. A magnetic stir bar was added to the tube carefully and the mixture was stirred slowly for 5 min at room temperature. Then the temperature was increased to 100 °C and the stir was continued for 5 h. After it cooled down to room temperature, it was purified by flash chromatography on silica gel to afford a pure product.

**<sup>1</sup>H NMR** (400 MHz, CDCl<sub>3</sub>) δ 7.57-7.46 (m, 2H), 7.42-7.32 (m, 2H), 7.32-7.26 (m, 2H), 7.24-7.11 (m, 3H), 7.09-6.96 (m, 4H), 6.21 (d, *J* = 10.4 Hz, 1H), 3.54 (dq, *J* = 10.3, 6.9 Hz, 1H), 1.37 (d, *J* = 6.9 Hz, 3H) ppm; **<sup>13</sup>C NMR** (100 MHz, CDCl<sub>3</sub>) δ 145.75, 140.89, 138.51, 138.22, 135.29, 131.75, 131.58, 131.39, 128.98, 128.77, 126.95, 126.37, 121.61, 121.40, 39.59, 22.53 ppm.



**EI-MS**  $m/z$  (%): 440 ( $M^+$ ); **HRMS** (EI):  $m/z$  Exact mass calcd for  $C_{22}H_{18}Br_2$  [ $M$ ] $^+$ : 439.9770, found: 439.9773.

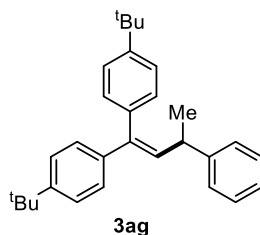

**4,4'-(3-phenylbut-1-ene-1,1-diyl)bis(tert-butylbenzene) (3ag)**, white solid (53% yield),  $R_f$  = 0.27 (silica, petroleum ether, UV and  $KMnO_4$  detection).

To an oven-dried, 10 mL Teflon-lined screw-capped Pyrex test tube, **1g** (0.6 mmol) and **2a** (0.66 mmol) were added without argon protection. A magnetic stir bar was added to the tube carefully and the mixture was stirred slowly for 5 min at room temperature. Then the temperature was increased to 100 °C and the stir was continued for 5 h. After it cooled down to room temperature, it was purified by flash chromatography on silica gel to afford a pure product.

**$^1H$  NMR** (400 MHz,  $CDCl_3$ )  $\delta$  7.37 (d,  $J$  = 8.3 Hz, 2H), 7.32-7.20 (m, 6H), 7.20-7.14 (m, 3H), 7.14-7.07 (m, 2H), 6.16 (d,  $J$  = 10.4 Hz, 1H), 3.63 (dq,  $J$  = 10.3, 6.9 Hz, 1H), 1.38 (d,  $J$  = 6.9 Hz, 3H), 1.36 (s, 9H), 1.29 (s, 9H) ppm;  **$^{13}C$  NMR** (100 MHz,  $CDCl_3$ )  $\delta$  150.00, 149.83, 146.56, 139.92, 139.84, 137.17, 133.49, 129.53, 128.53, 127.14, 127.01, 126.00, 125.15, 125.08, 39.20, 34.70, 34.57, 31.57, 31.46, 22.47 ppm.

**EI-MS**  $m/z$  (%): 396 ( $M^+$ ); **HRMS** (EI):  $m/z$  Exact mass calcd for  $C_{30}H_{36}$  [ $M$ ] $^+$ : 396.2812, found: 396.2818.

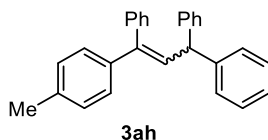

**(3-(*p*-tolyl)prop-2-ene-1,1,3-triyl)tribenzene (3ah)**, colorless oil (97% yield),  $R_f$  = 0.23 (silica, petroleum ether, UV and  $KMnO_4$  detection);

To an oven-dried, 10 mL Teflon-lined screw-capped Pyrex test tube, **1h** (0.6 mmol) and **2a** (0.66 mmol) were added without argon protection. A magnetic stir bar was added to the tube carefully and the mixture was stirred slowly for 5 min at room temperature. Then the temperature was increased to 100 °C and the stir was continued



for 5 h. After it cooled down to room temperature, it was purified by flash chromatography on silica gel to afford pure products.

**<sup>1</sup>H NMR** (400 MHz, CDCl<sub>3</sub>) δ 7.41-7.23 (m, 18.6H), 7.22-7.18 (m, 5.6H), 7.18-7.12 (m, 16.6H), 7.08-7.06 (m, 2.8H), 7.06-7.03 (m, 2H) 6.51 (d, *J* = 10.7 Hz, 1H), 6.50 (d, *J* = 10.5 Hz, 1.4H), 4.84 (d, *J* = 10.5 Hz, 1.4H), 4.80 (d, *J* = 10.7 Hz, 1H), 2.38 (s, 4.2H), 2.31 (s, 3H) ppm; **<sup>13</sup>C NMR** (100 MHz, CDCl<sub>3</sub>) δ 144.76, 142.63, 141.69, 141.59, 139.99, 139.58, 137.19, 137.05, 136.81, 130.97, 130.31, 129.91, 129.83, 129.12, 128.97, 128.61, 128.52, 128.50, 128.39, 128.22, 127.66, 127.50, 127.35, 127.31, 126.34, 50.67, 50.63, 21.41, 21.21 ppm.

**EI-MS** *m/z* (%): 360 (M<sup>+</sup>); **HRMS** (EI): *m/z* Exact mass calcd for C<sub>28</sub>H<sub>24</sub> [M]<sup>+</sup>: 360.1873, found: 360.1874.

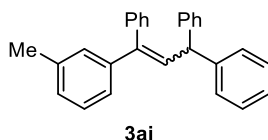

**(3-(*m*-tolyl)prop-2-ene-1,1,3-triyl)tribenzene (3ai)**, colorless oil (83% yield), *R<sub>f</sub>* = 0.23 (silica, petroleum ether, UV and KMnO<sub>4</sub> detection);

To an oven-dried, 10 mL Teflon-lined screw-capped Pyrex test tube, **1i** (0.6 mmol) and **2a** (0.66 mmol) were added without argon protection. A magnetic stir bar was added to the tube carefully and the mixture was stirred slowly for 5 min at room temperature. Then the temperature was increased to 100 °C and the stir was continued for 5 h. After it cooled down to room temperature, it was purified by flash chromatography on silica gel to afford pure products.

**<sup>1</sup>H NMR** (400 MHz, CDCl<sub>3</sub>) δ 7.39-7.13 (m, 32H), 7.13-7.07 (m, 2H), 7.03 (dd, *J* = 7.3, 1.8 Hz, 2H), 7.00-6.94 (m, 2H), 6.54 (d, *J* = 2.1 Hz, 1H), 6.51 (d, *J* = 2.3 Hz, 1H), 4.82 (d, *J* = 3.8 Hz, 1H), 4.80 (d, *J* = 3.9 Hz, 1H), 2.30 (s, 3H), 2.28 (s, 3H) ppm; **<sup>13</sup>C NMR** (100 MHz, CDCl<sub>3</sub>) δ 144.76, 144.70, 142.47, 142.36, 141.91, 141.84, 139.92, 139.70, 137.93, 137.82, 131.05, 131.00, 130.62, 129.91, 128.62, 128.59, 128.55, 128.51, 128.47, 128.39, 128.24, 128.19, 128.16, 127.63, 127.58, 127.56, 127.39, 127.37, 127.33, 127.00, 126.35, 124.91, 50.66, 50.64, 21.57 ppm.



**EI-MS**  $m/z$  (%): 360 ( $M^+$ ); **HRMS** (EI):  $m/z$  Exact mass calcd for  $C_{28}H_{24}$  [ $M$ ] $^+$ : 360.1873, found: 360.1880.

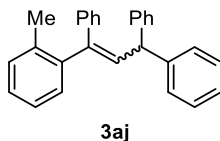

**(3-(*o*-tolyl)prop-2-ene-1,1,3-triyl)tribenzene (3aj)**, colorless oil (60% yield),  $R_f$  = 0.23 (silica, petroleum ether, UV and  $KMnO_4$  detection);

To an oven-dried, 10 mL Teflon-lined screw-capped Pyrex test tube, **1j** (0.6 mmol) and **2a** (0.66 mmol) were added without argon protection. A magnetic stir bar was added to the tube carefully and the mixture was stirred slowly for 5 min at room temperature. Then the temperature was increased to 100 °C and the stir was continued for 5 h. After it cooled down to room temperature, it was purified by flash chromatography on silica gel to afford pure products.

**$^1H$  NMR** (400 MHz,  $CDCl_3$ )  $\delta$  7.34-7.17 (m, 14+3.2H), 7.17-7.12 (m, 2+0.6H), 7.12-7.06 (m, 3H), 6.69 (d,  $J$  = 10.4 Hz, 1H), 6.16 (d,  $J$  = 10.7 Hz, 0.2H), 5.11 (d,  $J$  = 10.4 Hz, 0.2H), 4.58 (d,  $J$  = 10.4 Hz, 1H), 1.99 (s, 0.5H), 1.92 (s, 3H) ppm;  **$^{13}C$  NMR** (100 MHz,  $CDCl_3$ )  $\delta$  144.85, 144.65, 144.40, 143.54, 141.83, 141.18, 140.88, 139.89, 138.83, 137.02, 136.39, 133.35, 131.04, 130.44, 130.42, 130.30, 130.20, 129.33, 128.70, 128.57, 128.56, 128.49, 128.48, 128.45, 128.22, 127.70, 127.45, 127.34, 127.20, 126.58, 126.41, 126.35, 126.33, 125.82, 125.70, 50.75, 50.29, 20.64, 19.84 ppm.

**EI-MS**  $m/z$  (%): 360 ( $M^+$ ); **HRMS** (EI):  $m/z$  Exact mass calcd for  $C_{28}H_{24}$  [ $M$ ] $^+$ : 360.1873, found: 360.1883.

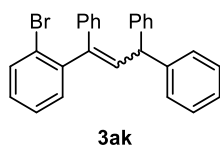

**(3-(2-bromophenyl)prop-2-ene-1,1,3-triyl)tribenzene (3ak)**, white solid (65% yield),  $R_f$  = 0.21 (silica, petroleum ether, UV and  $KMnO_4$  detection).

To an oven-dried, 10 mL Teflon-lined screw-capped Pyrex test tube, **1k** (0.6 mmol) and **2a** (1.2 mmol) were added without argon protection. A magnetic stir bar was added to the tube carefully and the mixture was stirred slowly for 5 min at room temperature.



Then the temperature was increased to 100 °C and the stir was continued for 5 h. After it cooled down to room temperature, it was purified by flash chromatography on silica gel to afford pure products.

**<sup>1</sup>H NMR** (400 MHz, CDCl<sub>3</sub>) δ 7.63 (d, *J* = 7.9 Hz, 1H), 7.44-7.01 (m, 18H), 6.69 (d, *J* = 10.4 Hz, 1H), 6.20 (d, *J* = 10.7 Hz, 0.16H), 5.10 (d, *J* = 10.7 Hz, 0.16H), 4.56 (d, *J* = 10.4 Hz, 1H) ppm; **<sup>13</sup>C NMR** (100 MHz, CDCl<sub>3</sub>) δ 144.06, 142.34, 140.92, 140.17, 140.03, 133.30, 132.21, 132.01, 129.53, 129.25, 128.68, 128.65, 128.62, 128.60, 128.52, 128.48, 128.45, 128.16, 127.57, 127.51, 127.40, 127.33, 126.71, 126.48, 126.40, 124.37, 50.96 ppm.

**DART-MS** *m/z* (%): 425 (M+H)<sup>+</sup>; **HRMS** (DART): *m/z* Exact mass calcd for C<sub>27</sub>H<sub>22</sub>Br [M+H]<sup>+</sup>: 425.0905, found: 425.0910.

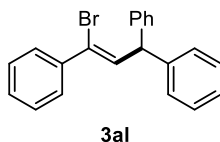

**(Z)-(3-bromoprop-2-ene-1,1,3-triyl)tribenzene (3al)**, white solid (66% yield), *R<sub>f</sub>* = 0.27 (silica, petroleum ether, UV and PMA detection).

To an oven-dried, 10 mL Teflon-lined screw-capped Pyrex test tube, **11** (0.6 mmol) and **2A** (1.8 mmol) were added without argon protection. A magnetic stir bar was added to the tube carefully and the mixture was stirred slowly for 5 min at room temperature. Then the temperature was increased to 100 °C and the stir was continued for 5 h. After it cooled down to room temperature, it was purified by flash chromatography on silica gel to afford a pure product.

**<sup>1</sup>H NMR** (400 MHz, CDCl<sub>3</sub>) δ 7.73-7.50 (m, 2H), 7.37-7.28 (m, 7H), 7.28-7.21 (m, 6H), 6.67 (d, *J* = 9.4 Hz, 1H), 5.36 (d, *J* = 9.4 Hz, 1H) ppm; **<sup>13</sup>C NMR** (100 MHz, CDCl<sub>3</sub>) δ 142.70, 139.67, 133.27, 128.67, 128.61, 128.32, 128.25, 127.77, 126.63, 126.18, 53.65 ppm.

**EI-MS** *m/z* (%): 348 (M<sup>+</sup>); **HRMS** (EI): *m/z* Exact mass calcd for C<sub>21</sub>H<sub>17</sub>Br [M]<sup>+</sup>: 348.0508, found: 348.0517.



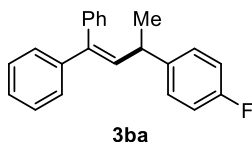

**(3-(4-fluorophenyl)but-1-ene-1,1-diyl)dibenzene (3ba)**, white solid (72% yield),  $R_f = 0.34$  (silica, petroleum ether, UV and  $\text{KMnO}_4$  detection).

To an oven-dried, 10 mL Teflon-lined screw-capped Pyrex test tube, **1a** (0.6 mmol) and **2b** (0.66 mmol) were added without argon protection. A magnetic stir bar was added to the tube carefully and the mixture was stirred slowly for 5 min at room temperature. Then the temperature was increased to 120 °C and the stir was continued for 5 h. After it cooled down to room temperature, it was purified by flash chromatography on silica gel to afford a pure product.

$^1\text{H}$  NMR (400 MHz,  $\text{CDCl}_3$ )  $\delta$  7.43-7.29 (m, 3H), 7.29-7.19 (m, 5H), 7.19-7.08 (m, 4H), 7.01-6.89 (m, 2H), 6.16 (d,  $J = 10.3$  Hz, 1H), 3.58 (dq,  $J = 10.3, 6.8$  Hz, 1H), 1.36 (d,  $J = 7.0$  Hz, 3H) ppm;  $^{13}\text{C}$  NMR (100 MHz,  $\text{CDCl}_3$ )  $\delta$  161.37 (d,  $J = 244.1$  Hz), 142.35, 142.00 (d,  $J = 3.1$  Hz), 140.50, 140.11, 133.99, 129.86, 128.45, 128.37, 128.26, 127.38, 127.28, 127.24, 115.31 (d,  $J = 21.0$  Hz), 38.71, 22.58 ppm;  $^{19}\text{F}$  NMR (376 MHz,  $\text{CDCl}_3$ )  $\delta$  -117.46 ppm.

**EI-MS**  $m/z$  (%): 302 ( $\text{M}^+$ ); **HRMS** (EI):  $m/z$  Exact mass calcd for  $\text{C}_{22}\text{H}_{19}\text{F}$  [ $\text{M}$ ] $^+$ : 302.1465, found: 302.1473.

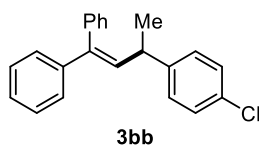

**(3-(4-chlorophenyl)but-1-ene-1,1-diyl)dibenzene (3bb)**, white solid (82% yield),  $R_f = 0.33$  (silica, petroleum ether, UV and  $\text{KMnO}_4$  detection).

To an oven-dried, 10 mL Teflon-lined screw-capped Pyrex test tube, **1a** (0.6 mmol) and **2c** (0.66 mmol) were added without argon protection. A magnetic stir bar was added to the tube carefully and the mixture was stirred slowly for 5 min at room temperature. Then the temperature was increased to 100 °C and the stir was continued for 5 h. After it cooled down to room temperature, it was purified by flash chromatography on silica gel to afford a pure product.



**<sup>1</sup>H NMR** (400 MHz, CDCl<sub>3</sub>) δ 7.45-7.29 (m, 3H), 7.28-7.18 (m, 7H), 7.18-7.07 (m, 4H), 6.15 (d, *J* = 10.3 Hz, 1H), 3.56 (dq, *J* = 10.2, 6.9 Hz, 1H), 1.36 (d, *J* = 6.9 Hz, 3H) ppm; **<sup>13</sup>C NMR** (100 MHz, CDCl<sub>3</sub>) δ 144.86, 142.28, 140.81, 140.05, 133.57, 131.77, 129.84, 128.70, 128.46, 128.44, 128.27, 127.39, 127.33, 127.29, 38.90, 22.47 ppm.

**EI-MS** *m/z* (%): 318 (M<sup>+</sup>); **HRMS** (EI): *m/z* Exact mass calcd for C<sub>22</sub>H<sub>19</sub>Cl [M]<sup>+</sup>: 318.1170, found: 318.1174.

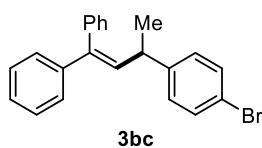

**(3-(4-bromophenyl)but-1-ene-1,1-diyl)dibenzene (3bc)**, white solid (60% yield), *R<sub>f</sub>* = 0.31 (silica, petroleum ether, UV and KMnO<sub>4</sub> detection).

To an oven-dried, 10 mL Teflon-lined screw-capped Pyrex test tube, **1a** (0.6 mmol) and **2d** (0.66 mmol) were added without argon protection. A magnetic stir bar was added to the tube carefully and the mixture was stirred slowly for 5 min at room temperature. Then the temperature was increased to 100 °C and the stir was continued for 5 h. After it cooled down to room temperature, it was purified by flash chromatography on silica gel to afford a pure product.

**<sup>1</sup>H NMR** (400 MHz, CDCl<sub>3</sub>) δ 7.48-7.30 (m, 4H), 7.30-7.18 (m, 6H), 7.18-7.13 (m, 2H), 7.12-7.00 (m, 2H), 6.14 (d, *J* = 10.3 Hz, 1H), 3.55 (dq, *J* = 10.3, 7.0 Hz, 1H), 1.36 (d, *J* = 6.9 Hz, 3H) ppm; **<sup>13</sup>C NMR** (100 MHz, CDCl<sub>3</sub>) δ 145.40, 142.26, 140.87, 140.04, 133.46, 131.65, 129.83, 128.86, 128.46, 128.27, 127.39, 127.33, 127.30, 119.84, 38.97, 22.42 ppm.

**EI-MS** *m/z* (%): 362 (M<sup>+</sup>); **HRMS** (EI): *m/z* Exact mass calcd for C<sub>22</sub>H<sub>19</sub>Br [M]<sup>+</sup>: 362.0665, found: 362.0661.

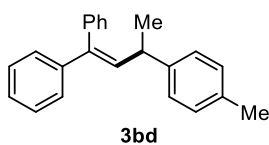

**(3-(p-tolyl)but-1-ene-1,1-diyl)dibenzene (3bd)**, white solid (98% yield), *R<sub>f</sub>* = 0.31 (silica, petroleum ether, UV and KMnO<sub>4</sub> detection).



To an oven-dried, 10 mL Teflon-lined screw-capped Pyrex test tube, **1a** (0.6 mmol) and **2e** (0.66 mmol) were added without argon protection. A magnetic stir bar was added to the tube carefully and the mixture was stirred slowly for 5 min at room temperature. Then the temperature was increased to 80 °C and the stir was continued for 5 h. After it cooled down to room temperature, it was purified by flash chromatography on silica gel to afford a pure product.

**<sup>1</sup>H NMR** (400 MHz, CDCl<sub>3</sub>) δ 7.43-7.28 (m, 3H), 7.27-7.14 (m, 7H), 7.10 (s, 4H), 6.20 (d, *J* = 10.4 Hz, 1H), 3.56 (dq, *J* = 10.4, 6.9 Hz, 1H), 2.31 (s, 3H), 1.36 (d, *J* = 6.9 Hz, 3H) ppm; **<sup>13</sup>C NMR** (100 MHz, CDCl<sub>3</sub>) δ 143.17, 142.42, 140.12, 139.89, 135.47, 134.37, 129.83, 129.17, 128.23, 128.05, 127.26, 127.02, 126.94, 126.79, 38.87, 22.44, 21.00 ppm.

**EI-MS** *m/z* (%): 298 (M<sup>+</sup>); **HRMS** (EI): *m/z* Exact mass calcd for C<sub>23</sub>H<sub>22</sub> [M]<sup>+</sup>: 298.1716, found: 298.1717.

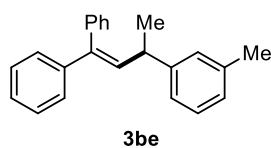

**(3-(*m*-tolyl)but-1-ene-1,1-diyl)dibenzene (3be)**, colorless oil (40% yield), *R<sub>f</sub>* = 0.30 (silica, petroleum ether, UV and KMnO<sub>4</sub> detection).

To an oven-dried, 10 mL Teflon-lined screw-capped Pyrex test tube, **1a** (0.6 mmol) and **2f** (0.66 mmol) were added without argon protection. A magnetic stir bar was added to the tube carefully and the mixture was stirred slowly for 5 min at room temperature. Then the temperature was increased to 100 °C and the stir was continued for 5 h. After it cooled down to room temperature, it was purified by flash chromatography on silica gel to afford a pure product.

**<sup>1</sup>H NMR** (400 MHz, CDCl<sub>3</sub>) δ 7.43-7.29 (m, 3H), 7.28-7.11 (m, 8H), 7.04-6.96 (m, 3H), 6.22 (d, *J* = 10.4 Hz, 1H), 3.56 (dq, *J* = 13.8, 6.9 Hz, 1H), 2.33 (s, 3H), 1.37 (d, *J* = 6.9 Hz, 3H) ppm; **<sup>13</sup>C NMR** (100 MHz, CDCl<sub>3</sub>) δ 146.30, 142.56, 140.24, 140.13, 138.16, 134.40, 129.99, 128.51, 128.37, 128.21, 127.80, 127.41, 127.17, 127.10, 126.90, 124.14, 39.38, 22.61, 21.68 ppm.



**EI-MS**  $m/z$  (%): 298 ( $M^+$ ); **HRMS** (EI):  $m/z$  Exact mass calcd for  $C_{23}H_{22}$  [ $M$ ] $^+$ : 298.1716, found: 298.1713.

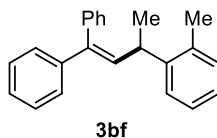

**(3-(*o*-tolyl)but-1-ene-1,1-diyl)dibenzene (3bf)**, colorless oil (94% yield),  $R_f$  = 0.31 (silica, petroleum ether, UV and  $KMnO_4$  detection).

To an oven-dried, 10 mL Teflon-lined screw-capped Pyrex test tube, **1a** (0.6 mmol) and **2g** (0.66 mmol) were added without argon protection. A magnetic stir bar was added to the tube carefully and the mixture was stirred slowly for 5 min at room temperature. Then the temperature was increased to 80 °C and stir was continued for 5 h. After it cooled down to room temperature, it was purified by flash chromatography on silica gel to afford a pure product.

**$^1H$  NMR** (400 MHz,  $CDCl_3$ )  $\delta$  7.40-7.29 (m, 4H), 7.27-7.16 (m, 6H), 7.16-7.11 (m, 2H), 7.10-7.05 (m, 2H), 6.24 (d,  $J$  = 10.0 Hz, 1H), 3.75 (dq,  $J$  = 10.0, 6.9 Hz, 1H), 1.96 (s, 3H), 1.37 (d,  $J$  = 6.9 Hz, 3H) ppm;  **$^{13}C$  NMR** (100 MHz,  $CDCl_3$ )  $\delta$  145.12, 142.60, 140.47, 140.29, 135.38, 134.28, 130.47, 129.87, 128.31, 128.20, 127.47, 127.21, 127.12, 126.40, 126.08, 125.87, 35.48, 22.83, 19.35 ppm.

**EI-MS**  $m/z$  (%): 298 ( $M^+$ ); **HRMS** (EI):  $m/z$  Exact mass calcd for  $C_{23}H_{22}$  [ $M$ ] $^+$ : 298.1716, found: 298.1713.

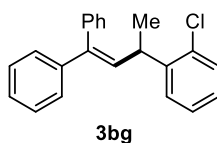

**(3-(2-chlorophenyl)but-1-ene-1,1-diyl)dibenzene (3bg)**, colorless oil (40% yield),  $R_f$  = 0.28 (silica, petroleum ether, UV and  $KMnO_4$  detection).

To an oven-dried, 10 mL Teflon-lined screw-capped Pyrex test tube, **1a** (0.6 mmol) and **2h** (0.66 mmol) were added without argon protection. A magnetic stir bar was added to the tube carefully and the mixture was stirred slowly for 5 min at room temperature. Then the temperature was increased to 100 °C and stir was continued for



5 h. After it cooled down to room temperature, it was purified by flash chromatography on silica gel to afford pure product.

**<sup>1</sup>H NMR** (400 MHz, CDCl<sub>3</sub>) δ 7.41-7.18 (m, 11H), 7.14-7.06 (m, 3H), 6.26 (d, *J* = 9.9 Hz, 1H), 4.05 (dq, *J* = 9.8, 6.8 Hz, 1H), 1.36 (d, *J* = 6.9 Hz, 3H) ppm; **<sup>13</sup>C NMR** (100 MHz, CDCl<sub>3</sub>) δ 144.27, 142.61, 141.72, 139.91, 133.27, 132.69, 129.85, 129.83, 128.26, 128.22, 128.17, 127.56, 127.26, 127.25, 127.23, 127.15, 36.41, 22.54 ppm.

**EI-MS** *m/z* (%): 318 (M<sup>+</sup>); **HRMS** (EI): *m/z* Exact mass calcd for C<sub>22</sub>H<sub>19</sub>Cl [M]<sup>+</sup>: 318.1170, found: 318.1166.

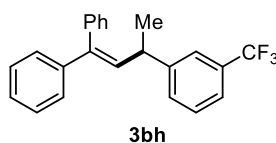

**(3-(3-(trifluoromethyl)phenyl)but-1-en-1,1-diyl)dibenzene (3bh)**, colorless oil (25% yield), *R*<sub>f</sub> = 0.34 (silica, petroleum ether, UV and PMA detection).

To an oven-dried, 10 mL Teflon-lined screw-capped Pyrex test tube, **1a** (0.6 mmol) and **2i** (1.8 mmol) were added without argon protection. A magnetic stir bar was added to the tube carefully and the mixture was stirred slowly for 5 min at room temperature. Then the temperature was increased to 120 °C and stir was continued for 5 h. After it cooled down to room temperature, it was purified by flash chromatography on silica gel to afford a pure product.

**<sup>1</sup>H NMR** (400 MHz, CDCl<sub>3</sub>) δ 7.47-7.30 (m, 7H), 7.29-7.19 (qd, *J* = 7.2, 6.1, 2.8 Hz, 5H), 7.20-7.11 (m, 2H), 6.18 (d, *J* = 10.2 Hz, 1H), 3.65 (dq, *J* = 10.3, 6.9 Hz, 1H), 1.41 (d, *J* = 6.9 Hz, 3H) ppm; **<sup>13</sup>C NMR** (100 MHz, CDCl<sub>3</sub>) δ 147.30, 142.11, 141.33, 139.96, 133.08, 130.86 (d, *J* = 31.8 Hz), 130.61 (q, *J* = 1.1 Hz), 129.79, 129.02, 128.53, 128.30, 127.42, 127.40, 127.38, 124.40 (q, *J* = 271.4 Hz), 123.75 (q, *J* = 3.8 Hz), 123.04 (q, *J* = 3.8 Hz), 39.37, 22.38 ppm; **<sup>19</sup>F NMR** (376 MHz, CDCl<sub>3</sub>) δ -62.52 ppm.

**EI-MS** *m/z* (%): 352 (M<sup>+</sup>); **HRMS** (EI): *m/z* Exact mass calcd for C<sub>23</sub>H<sub>19</sub>F<sub>3</sub> [M]<sup>+</sup>: 352.1443, found: 352.1431.

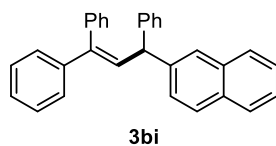



**2-(1,3,3-triphenylallyl)naphthalene (3bi)**, colorless oil (89% yield),  $R_f = 0.24$  (silica, petroleum ether, UV and PMA detection).

To an oven-dried, 10 mL Teflon-lined screw-capped Pyrex test tube, **1a** (0.6 mmol) and **2j** (0.66 mmol) were added without argon protection. A magnetic stir bar was added to the tube carefully and the mixture was stirred slowly for 5 min at room temperature. Then the temperature was increased to 100 °C and stir was continued for 3 h. After it cooled down to room temperature, it was purified by flash chromatography on silica gel to afford pure product.

$^1\text{H NMR}$  (400 MHz,  $\text{CDCl}_3$ )  $\delta$  7.84-7.69 (m, 3H), 7.64 (s, 1H), 7.48-7.40 (m, 2H), 7.39-7.33 (m, 3H), 7.30-7.15 (m, 13H), 6.63 (d,  $J = 10.5$  Hz, 1H), 4.98 (d,  $J = 10.5$  Hz, 1H) ppm;  $^{13}\text{C NMR}$  (100 MHz,  $\text{CDCl}_3$ )  $\delta$  144.57, 142.36, 142.10, 141.99, 139.81, 133.69, 132.31, 130.90, 129.93, 128.69, 128.59, 128.48, 128.30, 127.94, 127.74, 127.70, 127.50, 127.45, 127.24, 126.62, 126.48, 126.15, 125.69, 50.88 ppm.

**EI-MS**  $m/z$  (%): 396 ( $\text{M}^+$ ); **HRMS** (EI):  $m/z$  Exact mass calcd for  $\text{C}_{31}\text{H}_{24}$  [ $\text{M}$ ] $^+$ : 396.1878, found: 396.1875.

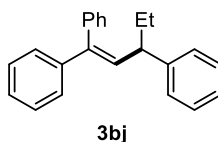

**pent-1-ene-1,1,3-triyltribenzene (3bj)**, white solid (71% yield),  $R_f = 0.32$  (silica, petroleum ether, UV and PMA detection).

To an oven-dried, 10 mL Teflon-lined screw-capped Pyrex test tube, **1a** (0.6 mmol) and **2k** (0.66 mmol) were added without argon protection. A magnetic stir bar was added to the tube carefully and the mixture was stirred slowly for 5 min at room temperature. Then the temperature was increased to 100 °C and stir was continued for 5 h. After it cooled down to room temperature, it was purified by flash chromatography on silica gel to afford pure product.

$^1\text{H NMR}$  (400 MHz,  $\text{CDCl}_3$ )  $\delta$  7.41-7.31 (m, 3H), 7.31-7.10 (m, 12H), 6.23 (d,  $J = 10.4$  Hz, 1H), 3.30 (dt,  $J = 10.5, 7.4$  Hz, 1H), 1.75 (p,  $J = 7.2$  Hz, 2H), 0.84 (t,  $J = 7.4$  Hz, 3H) ppm;  $^{13}\text{C NMR}$  (100 MHz,  $\text{CDCl}_3$ )  $\delta$  145.48, 142.65, 141.40, 140.35, 133.19,



130.08, 128.62, 128.30, 128.21, 127.53, 127.36, 127.11, 126.11, 47.20, 30.45, 12.32 ppm.

**EI-MS**  $m/z$  (%): 298 ( $M^+$ ); **HRMS** (EI):  $m/z$  Exact mass calcd for  $C_{23}H_{24}$  [ $M$ ] $^+$ : 298.1716, found: 298.1726.

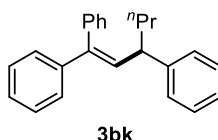

**hex-1-ene-1,1,3-triyltribenzene (3bk)**, colorless oil (87% yield),  $R_f$  = 0.33 (silica, petroleum ether, UV and PMA detection).

To an oven-dried, 10 mL Teflon-lined screw-capped Pyrex test tube, **1a** (0.6 mmol) and **2l** (0.66 mmol) were added without argon protection. A magnetic stir bar was added to the tube carefully and the mixture was stirred slowly for 5 min at room temperature. Then the temperature was increased to 100 °C and stir was continued for 5 h. After it cooled down to room temperature, it was purified by flash chromatography on silica gel to afford pure product.

**$^1H$  NMR** (400 MHz,  $CDCl_3$ )  $\delta$  7.42-7.09 (m, 15H), 6.23 (d,  $J$  = 10.4 Hz, 1H), 3.40 (dt,  $J$  = 10.5, 7.4 Hz, 1H), 1.76-1.61 (m, 2H), 1.39-1.25 (m, 1H), 1.23-1.11 (m, 1H), 0.81 (t,  $J$  = 7.3 Hz, 3H) ppm;  **$^{13}C$  NMR** (100 MHz,  $CDCl_3$ )  $\delta$  145.69, 142.62, 141.13, 140.30, 133.38, 130.06, 128.63, 128.27, 128.20, 127.48, 127.35, 127.12, 127.09, 126.07, 45.28, 39.89, 20.86, 14.18 ppm.

**EI-MS**  $m/z$  (%): 312 ( $M^+$ ); **HRMS** (EI):  $m/z$  Exact mass calcd for  $C_{24}H_{24}$  [ $M$ ] $^+$ : 312.1873, found: 312.1869.

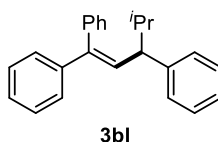

**(4-methylpent-1-ene-1,1,3-triyl)tribenzene (3bl)**, white solid (53% yield),  $R_f$  = 0.32 (silica, petroleum ether, UV and PMA detection).

To an oven-dried, 10 mL Teflon-lined screw-capped Pyrex test tube, **1a** (0.6 mmol) and **2m** (1.2 mmol) were added without argon protection. A magnetic stir bar was added to the tube carefully and the mixture was stirred slowly for 5 min at room temperature.



Then the temperature was increased to 100 °C and stir was continued for 5 h. After it cooled down to room temperature, it was purified by flash chromatography on silica gel to afford pure product.

**<sup>1</sup>H NMR** (400 MHz, CDCl<sub>3</sub>) δ 7.42-7.31 (m, 3H), 7.31-7.14 (m, 8H), 7.14-7.06 (m, 4H), 6.32 (d, *J* = 10.8 Hz, 1H), 3.02 (dd, *J* = 10.8, 8.9 Hz, 1H), 1.98 (dp, *J* = 9.0, 6.7 Hz, 1H), 0.97 (d, *J* = 6.7 Hz, 3H), 0.67 (d, *J* = 6.7 Hz, 3H) ppm; **<sup>13</sup>C NMR** (100 MHz, CDCl<sub>3</sub>) δ 144.95, 142.79, 141.48, 140.43, 132.45, 130.13, 128.54, 128.24, 128.20, 128.04, 127.31, 127.06, 127.04, 126.00, 53.18, 34.56, 21.08, 20.92 ppm.

**DART-MS** *m/z* (%): 313 (M+H)<sup>+</sup>; **HRMS** (DART): *m/z* Exact mass calcd for C<sub>24</sub>H<sub>25</sub> [M+H]<sup>+</sup>: 313.1945, found: 313.1948.

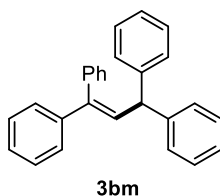

**prop-1-ene-1,1,3,3-tetraaryltetraphenylene (3bm)**, white solid (99% yield), *R<sub>f</sub>* = 0.26 (silica, petroleum ether, UV and PMA detection).

To an oven-dried, 10 mL Teflon-lined screw-capped Pyrex test tube, **1a** (0.6 mmol) and **2n** (0.66 mmol) were added without argon protection. A magnetic stir bar was added to the tube carefully and the mixture was stirred slowly for 5 min at room temperature. Then the temperature was increased to 80 °C and stir was continued for 3 h. After it cooled down to room temperature, it was purified by flash chromatography on silica gel to afford pure product.

**<sup>1</sup>H NMR** (400 MHz, CDCl<sub>3</sub>) δ 7.42-7.07 (m, 20H), 6.54 (d, *J* = 10.6 Hz, 1H), 4.81 (d, *J* = 10.6 Hz, 1H) ppm; **<sup>13</sup>C NMR** (100 MHz, CDCl<sub>3</sub>) δ 144.64, 142.35, 141.74, 139.79, 131.13, 129.93, 128.64, 128.50, 128.44, 128.27, 127.62, 127.43, 127.39, 126.39, 50.64 ppm.

**EI-MS** *m/z* (%): 346 (M<sup>+</sup>); **HRMS** (EI): *m/z* Exact mass calcd for C<sub>27</sub>H<sub>22</sub> [M]<sup>+</sup>: 346.1716, found: 346.1723.



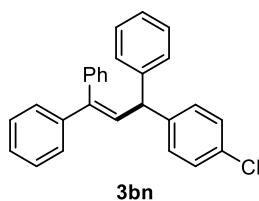

**(3-(4-chlorophenyl)prop-1-ene-1,1,3-triyl)tribenzene (3bn)**, white solid 68% yield),  $R_f = 0.25$  (silica, petroleum ether, UV and PMA detection).

To an oven-dried, 10 mL Teflon-lined screw-capped Pyrex test tube, **1a** (0.6 mmol) and **2o** (0.66 mmol) were added without argon protection. A magnetic stir bar was added to the tube carefully and the mixture was stirred slowly for 5 min at room temperature. Then the temperature was increased to 100 °C and stir was continued for 5 h. After it cooled down to room temperature, it was purified by flash chromatography on silica gel to afford pure product.

$^1\text{H NMR}$  (400 MHz,  $\text{CDCl}_3$ )  $\delta$  7.43-7.32 (m, 3H), 7.32-7.18 (m, 10H), 7.18-7.10 (m, 4H), 7.08 (d,  $J = 8.3$  Hz, 2H), 6.47 (d,  $J = 10.5$  Hz, 1H), 4.77 (d,  $J = 10.5$  Hz, 1H) ppm;  $^{13}\text{C NMR}$  (100 MHz,  $\text{CDCl}_3$ )  $\delta$  143.98, 143.02, 142.02, 141.95, 139.46, 132.02, 130.31, 129.66, 129.64, 128.59, 128.33, 128.22, 128.14, 127.43, 127.38, 127.36, 126.44, 49.93 ppm.

**EI-MS**  $m/z$  (%): 380 ( $\text{M}^+$ ); **HRMS** (EI):  $m/z$  Exact mass calcd for  $\text{C}_{27}\text{H}_{21}\text{Cl}$  [ $\text{M}$ ] $^+$ : 380.1326, found: 380.1320.

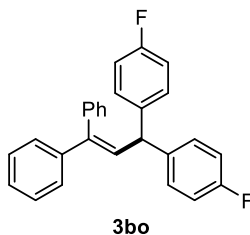

**4,4'-(3,3-diphenylprop-2-ene-1,1-diyl)bis(fluorobenzene) (3bo)**, colorless oil (96% yield),  $R_f = 0.23$  (silica, petroleum ether, UV and PMA detection).

To an oven-dried, 10 mL Teflon-lined screw-capped Pyrex test tube, **1a** (0.6 mmol) and **2p** (0.66 mmol) were added without argon protection. A magnetic stir bar was added to the tube carefully and the mixture was stirred slowly for 5 min at room temperature. Then the temperature was increased to 100 °C and stir was continued for



5 h. After it cooled down to room temperature, it was purified by flash chromatography on silica gel to afford pure product.

**<sup>1</sup>H NMR** (400 MHz, CDCl<sub>3</sub>) δ 7.44-7.31 (m, 3H), 7.28-7.20 (m, 5H), 7.18-7.11 (m, 2H), 7.11-7.04 (m, 4H), 7.02-6.90 (m, 4H), 6.43 (d, *J* = 10.5 Hz, 1H), 4.76 (d, *J* = 10.5 Hz, 1H) ppm; **<sup>13</sup>C NMR** (100 MHz, CDCl<sub>3</sub>) δ 161.60 (d, *J* = 244.9 Hz), 142.06 (d, *J* = 7.2 Hz), 140.17 (d, *J* = 3.4 Hz), 139.58, 130.59, 129.85, 129.77, 129.75, 128.54, 128.35, 127.60, 127.58, 115.51 (d, *J* = 21.4 Hz), 49.18 ppm; **<sup>19</sup>F NMR** (376 MHz, CDCl<sub>3</sub>) δ -115.39 ppm.

**EI-MS** *m/z* (%): 382 (M<sup>+</sup>); **HRMS** (EI): *m/z* Exact mass calcd for C<sub>27</sub>H<sub>20</sub>F<sub>2</sub> [M]<sup>+</sup>: 382.1528, found: 382.1536.

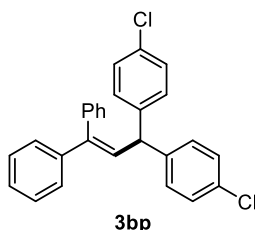

**4,4'-(3,3-diphenylprop-2-ene-1,1-diyl)bis(chlorobenzene) (3bp)**, colorless oil (92% yield), *R<sub>f</sub>* = 0.23 (silica, petroleum ether, UV and PMA detection).

To an oven-dried, 10 mL Teflon-lined screw-capped Pyrex test tube, **1a** (0.6 mmol) and **2q** (0.66 mmol) were added without argon protection. A magnetic stir bar was added to the tube carefully and the mixture was stirred slowly for 5 min at room temperature. Then the temperature was increased to 100 °C and stir was continued for 5 h. After it cooled down to room temperature, it was purified by flash chromatography on silica gel to afford pure product.

**<sup>1</sup>H NMR** (400 MHz, CDCl<sub>3</sub>) δ 7.40-7.32 (m, 3H), 7.25-7.20 (m, 9H), 7.16-7.08 (m, 2H), 7.08-7.01 (m, 4H), 6.40 (d, *J* = 10.4 Hz, 1H), 4.74 (d, *J* = 10.4 Hz, 1H) ppm; **<sup>13</sup>C NMR** (100 MHz, CDCl<sub>3</sub>) δ 142.68, 142.64, 141.89, 139.46, 132.44, 129.83, 129.73, 129.70, 128.89, 128.57, 128.36, 127.68, 127.59, 49.52 ppm.

**EI-MS** *m/z* (%): 414 (M<sup>+</sup>); **HRMS** (EI): *m/z* Exact mass calcd for C<sub>27</sub>H<sub>20</sub>Cl<sub>2</sub> [M]<sup>+</sup>: 414.0937, found: 414.0927.



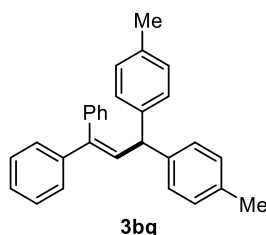

**4,4'-(3,3-diphenylprop-2-ene-1,1-diyl)bis(methylbenzene) (3bq)**, white solid (98% yield),  $R_f = 0.27$  (silica, petroleum ether, UV and PMA detection).

To an oven-dried, 10 mL Teflon-lined screw-capped Pyrex test tube, **1a** (0.6 mmol) and **2r** (0.66 mmol) were added without argon protection. A magnetic stir bar was added to the tube carefully and the mixture was stirred slowly for 5 min at room temperature. Then the temperature was increased to 100 °C and stir was continued for 5 h. After it cooled down to room temperature, it was purified by flash chromatography on silica gel to afford pure product.

$^1\text{H NMR}$  (400 MHz,  $\text{CDCl}_3$ )  $\delta$  7.45-7.28 (m, 3H), 7.27-7.23 (m, 3H), 7.23-7.21 (m, 2H), 7.19-7.14 (m, 2H), 7.09 (d,  $J = 8.1$  Hz, 4H), 7.04 (d,  $J = 8.1$  Hz, 4H), 6.51 (d,  $J = 10.6$  Hz, 1H), 4.74 (d,  $J = 10.6$  Hz, 1H), 2.31 (s, 6H) ppm;  $^{13}\text{C NMR}$  (100 MHz,  $\text{CDCl}_3$ )  $\delta$  142.49, 141.85, 141.28, 139.90, 135.81, 131.54, 129.96, 129.30, 128.38, 128.31, 128.22, 127.62, 127.34, 127.27, 49.88, 21.17 ppm.

**EI-MS**  $m/z$  (%): 374 ( $\text{M}^+$ ); **HRMS** (EI):  $m/z$  Exact mass calcd for  $\text{C}_{29}\text{H}_{26}$  [ $\text{M}$ ] $^+$ : 374.2029, found: 374.2039.

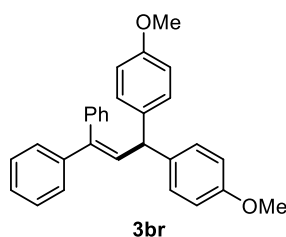

**4,4'-(3,3-diphenylprop-2-ene-1,1-diyl)bis(methoxybenzene) (3br)**, white solid (81% yield),  $R_f = 0.30$  (silica, petroleum ether/ethyl acetate = 50:1  $v/v$ , UV and PMA detection).

To an oven-dried, 10 mL Teflon-lined screw-capped Pyrex test tube, **1a** (0.6 mmol) and **2s** (0.66 mmol) were added without argon protection. A magnetic stir bar was added to the tube carefully and the mixture was stirred slowly for 5 min at room temperature. Then the temperature was increased to 100 °C and stir was continued for 5 h. After it



cooled down to room temperature, it was purified by flash chromatography on silica gel to afford pure product.

**<sup>1</sup>H NMR** (400 MHz, CDCl<sub>3</sub>) δ 7.43-7.29 (m, 3H), 7.29-7.20 (m, 5H), 7.20-7.11 (m, 2H), 7.06 (d, *J* = 8.5 Hz, 4H), 6.89-6.69 (m, 4H), 6.47 (d, *J* = 10.6 Hz, 1H), 4.70 (d, *J* = 10.6 Hz, 1H), 3.78 (s, 6H) ppm; **<sup>13</sup>C NMR** (100 MHz, CDCl<sub>3</sub>) δ 158.10, 142.47, 141.07, 139.89, 137.09, 131.71, 129.94, 129.34, 128.39, 128.24, 127.61, 127.36, 127.29, 113.99, 55.39, 48.99 ppm.

**EI-MS** *m/z* (%): 406 (M<sup>+</sup>); **HRMS** (EI): *m/z* Exact mass calcd for C<sub>29</sub>H<sub>26</sub>O<sub>2</sub> [M]<sup>+</sup>: 406.1927, found: 406.1938.

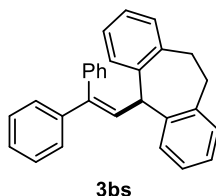

**5-(2,2-diphenylvinyl)-10,11-dihydro-5H-dibenzo[a,d][7]annulene (3bs)**, white solid (82% yield), *R<sub>f</sub>* = 0.26 (silica, petroleum ether/ethyl acetate = 50:1 *v/v*, UV and PMA detection).

To an oven-dried, 10 mL Teflon-lined screw-capped Pyrex test tube, **1a** (0.6 mmol) and **2t** (1.8 mmol) were added without argon protection. A magnetic stir bar was added to the tube carefully and the mixture was stirred slowly for 5 min at room temperature. Then the temperature was increased to 100 °C and stir was continued for 5 h. After it cooled down to room temperature, it was purified by flash chromatography on silica gel to afford pure product.

**<sup>1</sup>H NMR** (400 MHz, CDCl<sub>3</sub>) δ 7.43-7.31 (m, 3H), 7.29-7.18 (m, 5H), 7.13 (dt, *J* = 5.5, 1.9 Hz, 2H), 7.07 (dq, *J* = 13.7, 3.4 Hz, 8H), 6.96 (d, *J* = 10.0 Hz, 1H), 5.02 (d, *J* = 10.0 Hz, 1H), 3.70-3.19 (m, 2H), 3.19-2.69 (m, 2H) ppm; **<sup>13</sup>C NMR** (100 MHz, CDCl<sub>3</sub>) δ 142.40, 141.70, 141.28, 139.84, 139.20, 130.57, 130.35, 130.05, 128.83, 128.47, 128.25, 127.40, 127.39, 127.31, 126.68, 126.22, 50.09, 33.24 ppm.

**EI-MS** *m/z* (%): 372 (M<sup>+</sup>); **HRMS** (EI): *m/z* Exact mass calcd for C<sub>29</sub>H<sub>24</sub> [M]<sup>+</sup>: 372.1873, found: 372.1862.



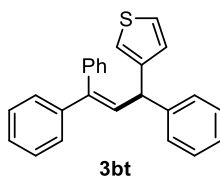

**3-(1,3,3-triphenylallyl)thiophene (3bt)**, colorless oil (68% yield),  $R_f = 0.22$  (silica, petroleum ether, UV and PMA detection);

To an oven-dried, 10 mL Teflon-lined screw-capped Pyrex test tube, **1a** (0.6 mmol) and **2u** (1.8 mmol) were added without argon protection. A magnetic stir bar was added to the tube carefully and the mixture was stirred slowly for 5 min at room temperature. Then the temperature was increased to 100 °C and stir was continued for 3 h. After it cooled down to room temperature, it was purified by flash chromatography on silica gel to afford pure product.

$^1\text{H NMR}$  (400 MHz,  $\text{CDCl}_3$ )  $\delta$  7.48-7.09 (m, 16H), 6.95 (dt,  $J = 2.7, 1.1$  Hz, 1H), 6.83 (dd,  $J = 5.0, 1.2$  Hz, 1H), 6.50 (d,  $J = 10.5$  Hz, 1H), 4.82 (d,  $J = 10.5$  Hz, 1H) ppm;  $^{13}\text{C NMR}$  (100 MHz,  $\text{CDCl}_3$ )  $\delta$  145.18, 144.16, 142.28, 141.56, 139.72, 130.74, 129.91, 128.71, 128.47, 128.43, 128.28, 128.18, 128.01, 127.62, 127.57, 127.47, 127.42, 126.55, 125.74, 121.24, 46.76 ppm.

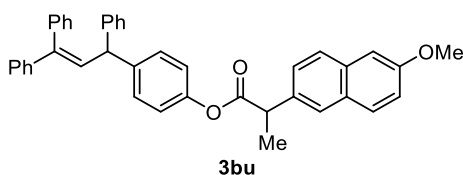

**4-(1,3,3-triphenylallyl)phenyl 2-(6-methoxynaphthalen-2-yl)propanoate (3bu)**, colorless oil (67% yield),  $R_f = 0.38$  (silica, petroleum ether/ethyl acetate = 15:1 v/v, UV and PMA detection).

To an oven-dried, 10 mL Teflon-lined screw-capped Pyrex test tube, **1a** (0.6 mmol) and **2v** (1.8 mmol) were added without argon protection. A magnetic stir bar was added to the tube carefully and the mixture was stirred slowly for 5 min at room temperature. Then the temperature was increased to 100 °C and stir was continued for 3 h. After it cooled down to room temperature, it was purified by flash chromatography on silica gel to afford pure product.



**<sup>1</sup>H NMR** (400 MHz, CDCl<sub>3</sub>) δ 7.73-7.59 (m, 3H), 7.41 (dd, *J* = 8.5, 1.7 Hz, 1H), 7.30-7.22 (m, 3H), 7.21-6.99 (m, 16H), 6.83 (d, *J* = 8.6 Hz, 2H), 6.39 (d, *J* = 10.5 Hz, 1H), 4.69 (d, *J* = 10.5 Hz, 1H), 4.00 (q, *J* = 7.1 Hz, 1H), 3.83 (s, 3H), 1.60 (d, *J* = 7.1 Hz, 3H) ppm; **<sup>13</sup>C NMR** (100 MHz, CDCl<sub>3</sub>) δ 173.40, 157.87, 149.34, 144.34, 142.22, 142.08, 141.91, 139.68, 135.30, 133.94, 130.81, 129.84, 129.46, 129.32, 129.13, 128.67, 128.45, 128.27, 127.60, 127.49, 127.47, 127.43, 126.48, 126.27, 121.43, 119.23, 105.75, 55.46, 50.07, 45.72, 18.65 ppm.

**EI-MS** *m/z* (%): 574 (M<sup>+</sup>); **HRMS** (EI): *m/z* Exact mass calcd for C<sub>41</sub>H<sub>34</sub>O<sub>3</sub> [M]<sup>+</sup>: 574.2508, found: 574.2503.

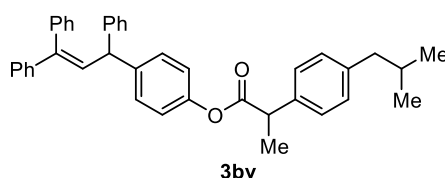

**4-(1,3,3-triphenylallyl)phenyl 2-(4-isobutylphenyl)propanoate (3bv)**, colorless oil (74% yield), *R*<sub>f</sub> = 0.22 (silica, petroleum ether/ethyl acetate = 30:1 v/v, UV and PMA detection).

To an oven-dried, 10 mL Teflon-lined screw-capped Pyrex test tube, **1a** (0.6 mmol) and **2w** (1.8 mmol) were added without argon protection. A magnetic stir bar was added to the tube carefully and the mixture was stirred slowly for 5 min at room temperature. Then the temperature was increased to 100 °C and stir was continued for 3 h. After it cooled down to room temperature, it was purified by flash chromatography on silica gel to afford pure product.

**<sup>1</sup>H NMR** (400 MHz, CDCl<sub>3</sub>) δ 7.48-7.03 (m, 21H), 6.95 (d, *J* = 8.1 Hz, 2H), 6.51 (d, *J* = 10.5 Hz, 1H), 4.82 (d, *J* = 10.5 Hz, 1H), 3.96 (q, *J* = 6.9 Hz, 1H), 2.50 (d, *J* = 7.1 Hz, 2H), 1.89 (dt, *J* = 13.3, 6.6 Hz, 1H), 1.63 (d, *J* = 7.0 Hz, 3H), 0.94 (d, *J* = 6.5 Hz, 6H) ppm; **<sup>13</sup>C NMR** (100 MHz, CDCl<sub>3</sub>) δ 173.46, 149.37, 144.37, 142.23, 142.03, 141.91, 140.94, 139.69, 137.39, 130.83, 129.85, 129.62, 129.31, 128.68, 128.46, 128.28, 127.61, 127.48, 127.44, 127.34, 126.49, 121.45, 50.08, 45.39, 45.18, 30.33, 22.53, 18.63 ppm.

**EI-MS** *m/z* (%): 550 (M<sup>+</sup>); **HRMS** (EI): *m/z* Exact mass calcd for C<sub>40</sub>H<sub>38</sub>O<sub>2</sub> [M]<sup>+</sup>:



550.2872, found: 550.2869.

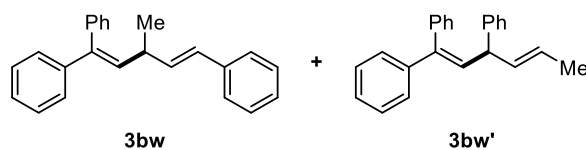

**(*E*)-(3-methylpenta-1,4-diene-1,1,5-triyl)tribenzene (3bw)** and **(*E*)-hexa-1,4-diene-1,1,3-triyltribenzene (3bw')**, colorless oil (87% yield, 3bw/3bw' = 1:0.6),  $R_f$  = 0.53 (silica, petroleum ether, UV and PMA detection).

To an oven-dried, 10 mL Teflon-lined screw-capped Pyrex test tube, **1a** (0.6 mmol) and **2x** (1.8 mmol) were added without argon protection. A magnetic stir bar was added to the tube carefully and the mixture was stirred slowly for 5 min at room temperature. Then the temperature was increased to 100 °C and stir was continued for 3 h. After it cooled down to room temperature, it was purified by flash chromatography on silica gel to afford pure product.

**$^1\text{H}$  NMR** (400 MHz,  $\text{CDCl}_3$ )  $\delta$  7.55-7.09 (m, 15+9H), 6.38 (d,  $J$  = 16.3 Hz, 1H), 6.32-6.23 (m, 1+0.6H), 6.05 (d,  $J$  = 10.0 Hz, 1H), 5.71 (ddd,  $J$  = 15.3, 6.3, 1.5 Hz, 0.6H), 5.62-5.50 (m, 0.6H), 4.19 (dd,  $J$  = 10.1, 6.5 Hz, 0.6H), 3.45 – 3.04 (m, 1H), 1.77 (dt,  $J$  = 6.3, 1.3 Hz, 1.8H), 1.26 (d,  $J$  = 6.8 Hz, 3H) ppm;  **$^{13}\text{C}$  NMR** (100 MHz,  $\text{CDCl}_3$ )  $\delta$  144.32, 142.59, 142.54, 141.07, 140.99, 140.25, 140.03, 137.86, 134.90, 133.53, 132.92, 130.98, 129.92, 129.88, 128.63, 128.36, 128.25, 128.22, 127.80, 127.51, 127.43, 127.28, 127.21, 127.17, 127.13, 126.31, 126.21, 125.94, 48.13, 37.24, 21.35, 18.24 ppm.

**EI-MS**  $m/z$  (%): 310 ( $\text{M}^+$ ); **HRMS** (EI):  $m/z$  Exact mass calcd for  $\text{C}_{24}\text{H}_{22}$  [ $\text{M}$ ] $^+$ : 310.1722, found: 310.1726.

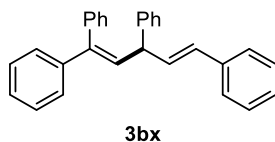

**(*E*)-penta-1,4-diene-1,1,3,5-tetrayltetrabenzene (3bx)**, colorless oil (88% yield),  $R_f$  = 0.46 (silica, petroleum ether, UV and PMA detection).



To an oven-dried, 10 mL Teflon-lined screw-capped Pyrex test tube, **1a** (0.6 mmol) and **2y** (1.8 mmol) were added without argon protection. A magnetic stir bar was added to the tube carefully and the mixture was stirred slowly for 5 min at room temperature. Then the temperature was increased to 100 °C and stir was continued for 3 h. After it cooled down to room temperature, it was purified by flash chromatography on silica gel to afford pure product.

**<sup>1</sup>H NMR** (400 MHz, CDCl<sub>3</sub>) δ 7.49-7.05 (m, 1H), 6.40-6.28 (m, 2H), 6.23 (d, *J* = 10.2 Hz, 1H), 4.27 (dd, *J* = 10.2, 4.0 Hz, 1H) ppm; **<sup>13</sup>C NMR** (100 MHz, CDCl<sub>3</sub>) δ 143.68, 142.35, 141.98, 139.89, 137.56, 132.55, 130.40, 129.99, 129.90, 128.79, 128.68, 128.47, 128.29, 127.94, 127.57, 127.45, 127.40, 126.61, 126.40, 48.43 ppm.

**EI-MS** *m/z* (%): 372 (M<sup>+</sup>); **HRMS** (EI): *m/z* Exact mass calcd for C<sub>29</sub>H<sub>24</sub> [M]<sup>+</sup>: 372.1878, found: 372.1870.

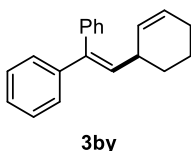

**(2-(cyclohex-2-en-1-yl)ethene-1,1-diyl)dibenzene (3by)**, colorless oil (66% yield), *R<sub>f</sub>* = 0.38 (silica, petroleum ether, UV and PMA detection).

To an oven-dried, 10 mL Teflon-lined screw-capped Pyrex test tube, **1a** (0.6 mmol) and **2z** (1.8 mmol) were added without argon protection. A magnetic stir bar was added to the tube carefully and the mixture was stirred slowly for 5 min at room temperature. Then the temperature was increased to 100 °C and stir was continued for 5 h. After it cooled down to room temperature, it was purified by flash chromatography on silica gel to afford pure product.

**<sup>1</sup>H NMR** (400 MHz, CDCl<sub>3</sub>) δ 7.40-7.34 (m, 2H), 7.33-7.28 (m, 1H), 7.27-7.13 (m, 7H), 5.94 (d, *J* = 10.4 Hz, 1H), 5.84-5.62 (m, 1H), 5.56-5.46 (m, 1H), 3.00-2.85 (m, 1H), 2.08-1.87 (m, 2H), 1.87-1.65 (m, 2H), 1.58-1.34 (m, 2H) ppm; **<sup>13</sup>C NMR** (100 MHz, CDCl<sub>3</sub>) δ 142.70, 140.90, 140.32, 133.82, 130.17, 129.95, 128.35, 128.20, 127.83, 127.34, 127.06, 127.02, 36.12, 29.70, 24.99, 21.01 ppm.

**EI-MS** *m/z* (%): 260 (M<sup>+</sup>); **HRMS** (EI): *m/z* Exact mass calcd for C<sub>20</sub>H<sub>20</sub> [M]<sup>+</sup>: 260.1560, found: 260.1552.



#### S4. NMR characterization of substrate interactions

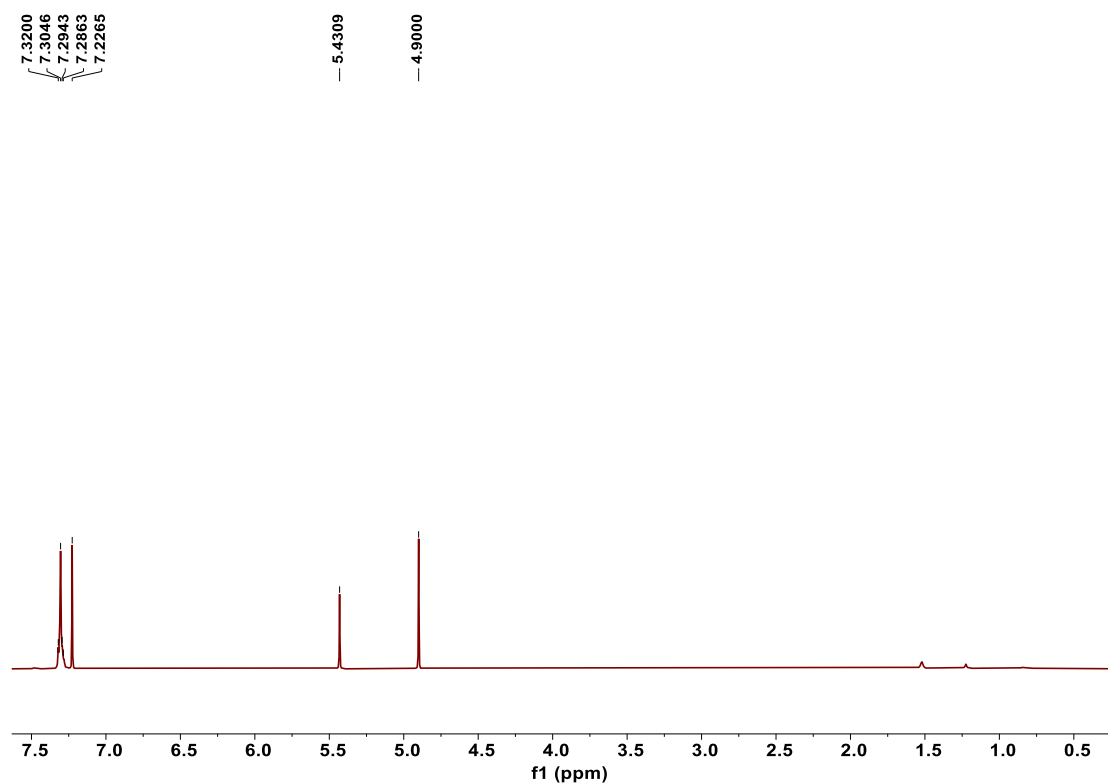

Figure S1. <sup>1</sup>H NMR spectrum of **1a** in the single-molecular state.

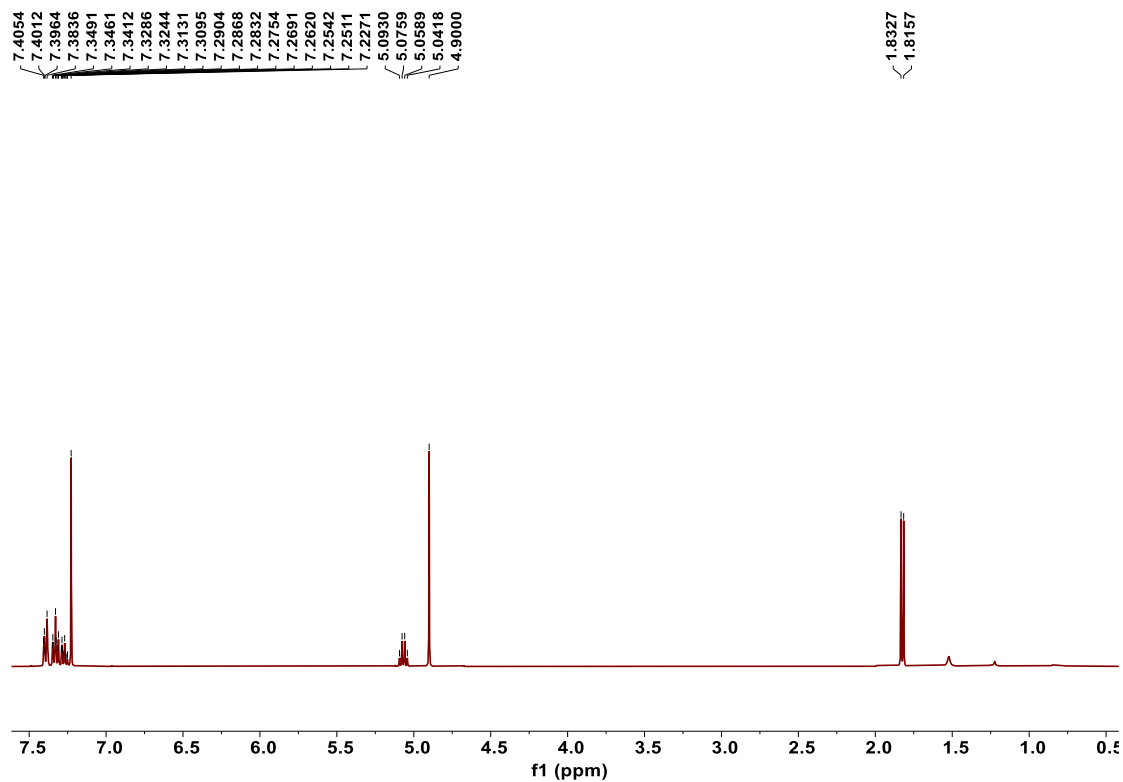

Figure S2. <sup>1</sup>H NMR spectrum of **2a** in the single-molecular state.



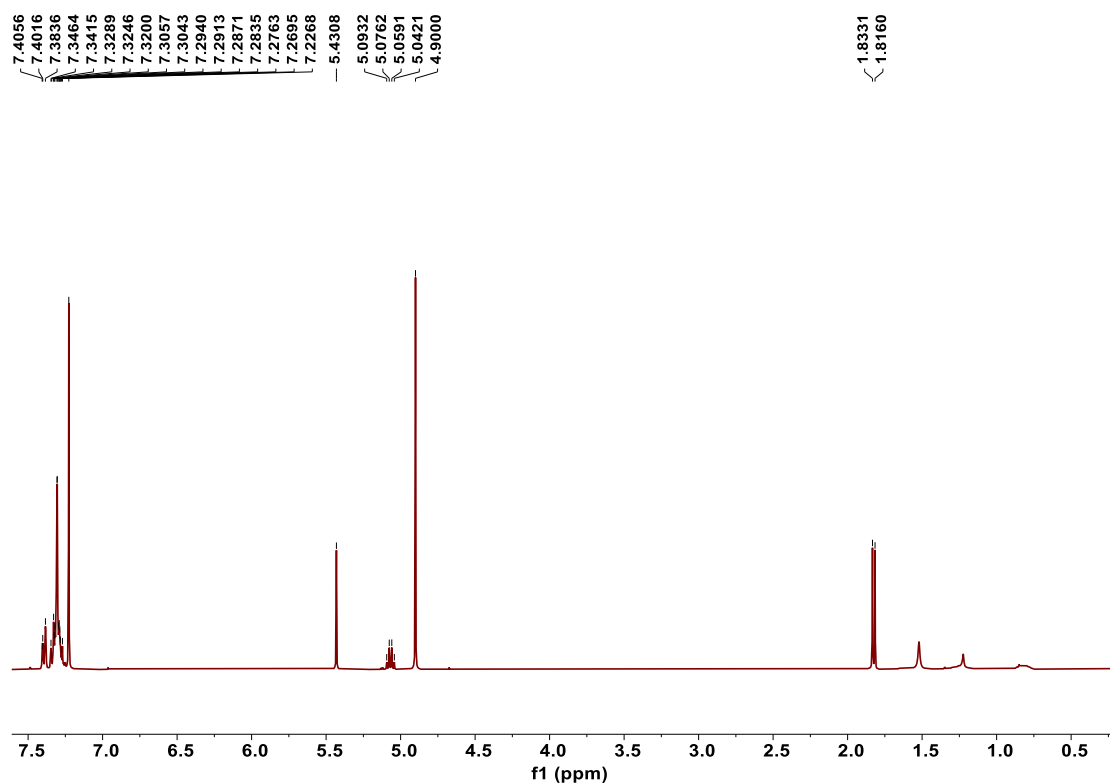

Figure S3.  $^1\text{H}$  NMR spectrum of **1a**+**2a** in the single-molecular state. ( $V_{1a}/V_{2a} = 1:1$ )

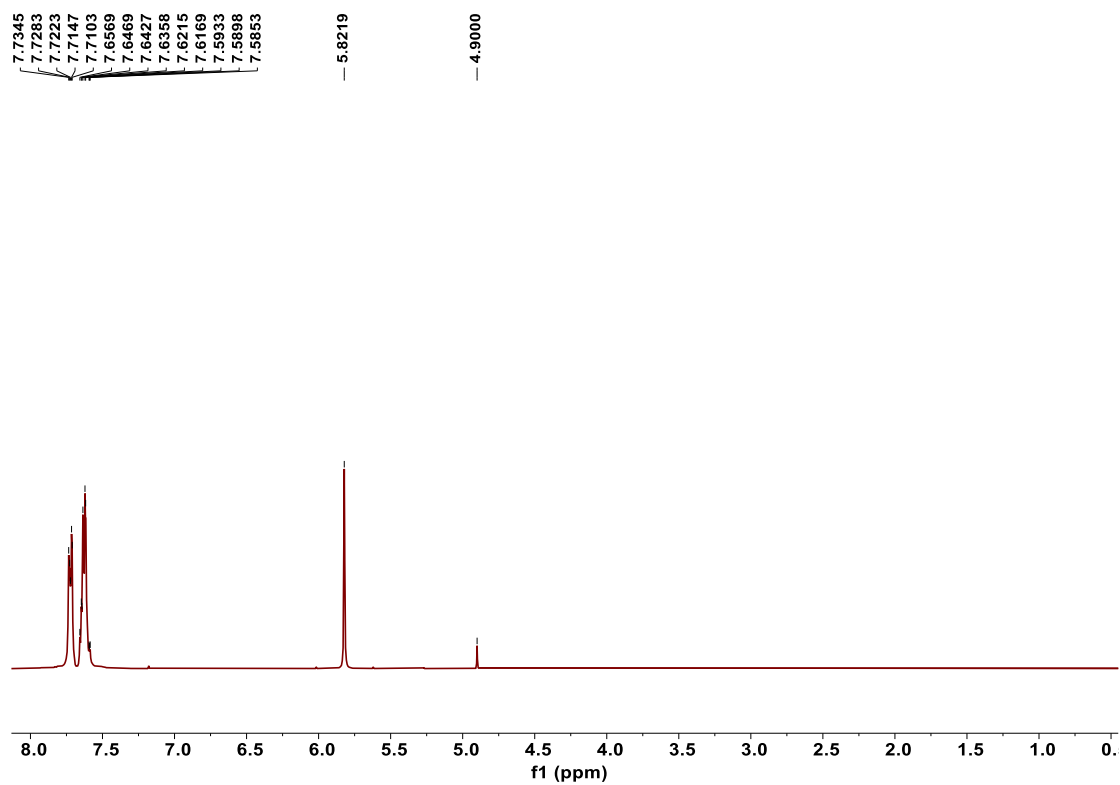

Figure S4.  $^1\text{H}$  NMR spectrum of **1a** in the aggregate molecular state.



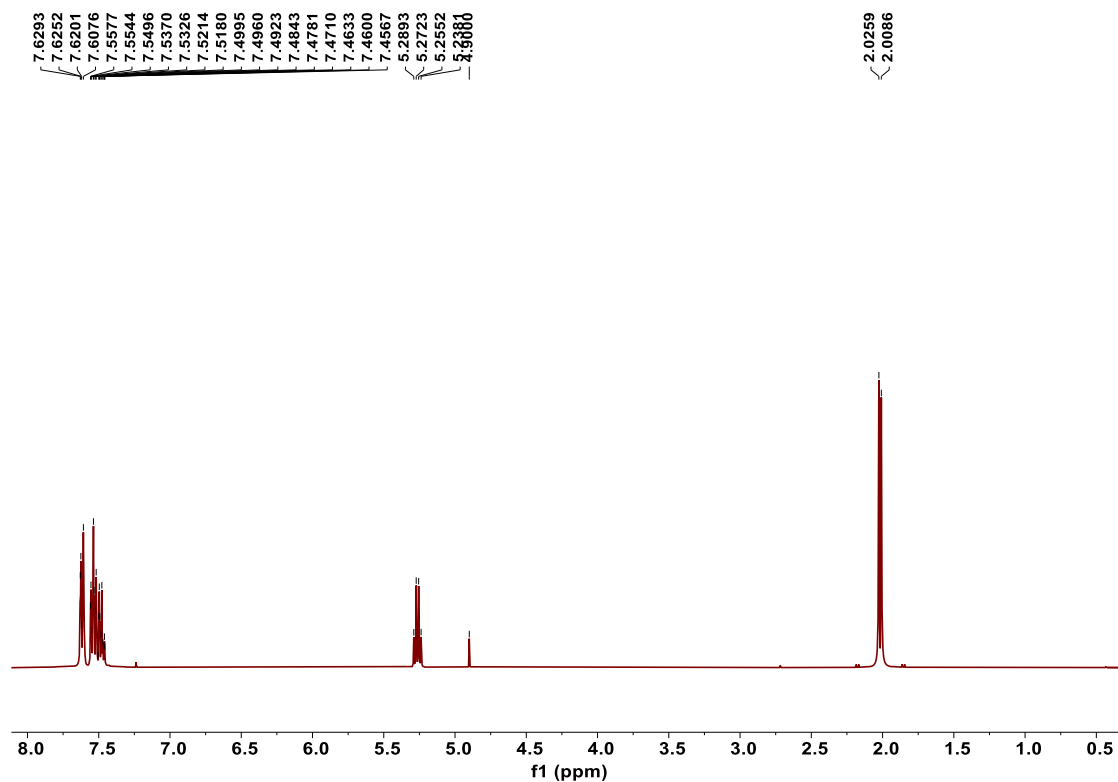

Figure S5.  $^1\text{H}$  NMR spectrum of **2a** in the aggregate molecular state.

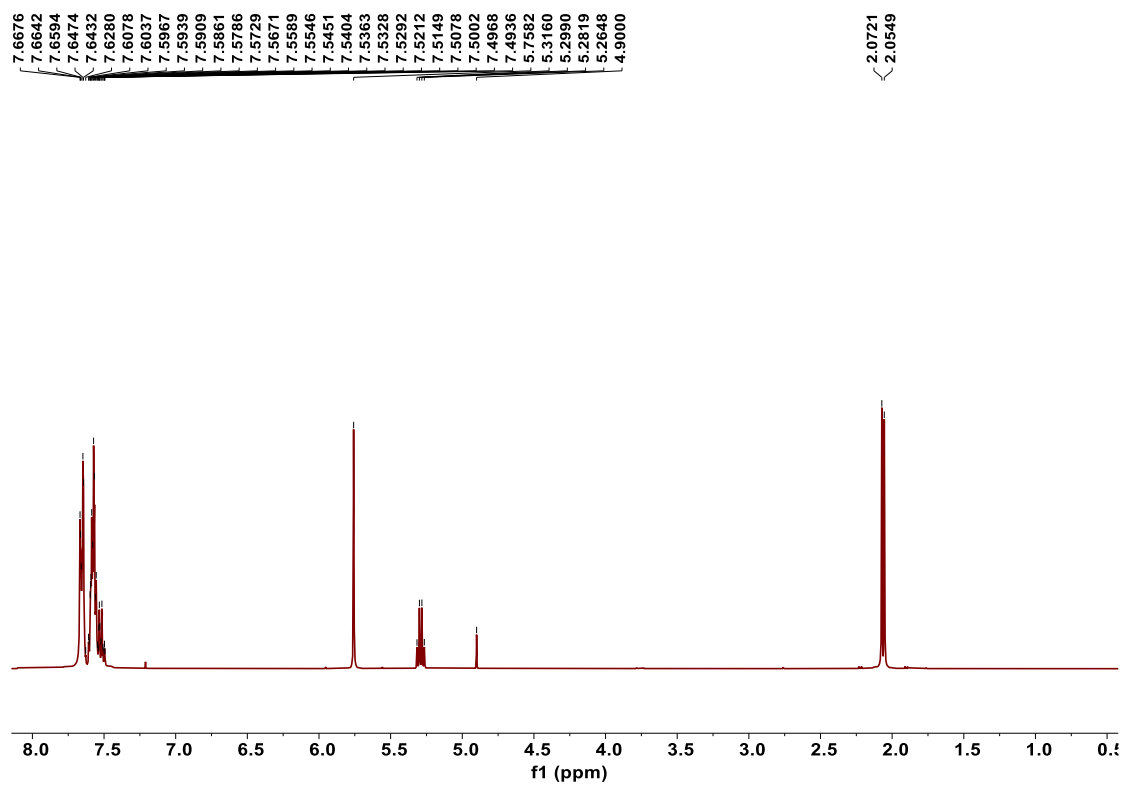

Figure S6.  $^1\text{H}$  NMR spectrum of **1a+2a** in the aggregate molecular state. ( $V_{1a}/V_{2a} = 1:1$ )



### S5. Control experiments

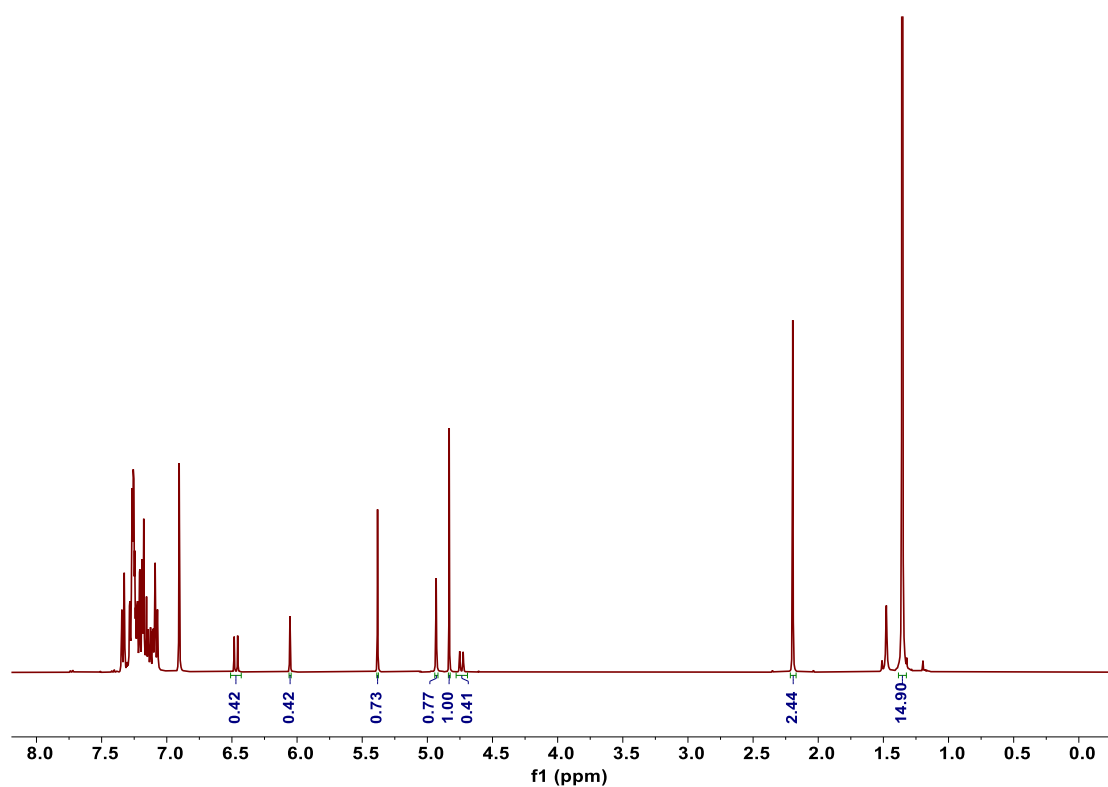

Figure S7.  $^1\text{H}$  NMR spectrum of radical capture experiment

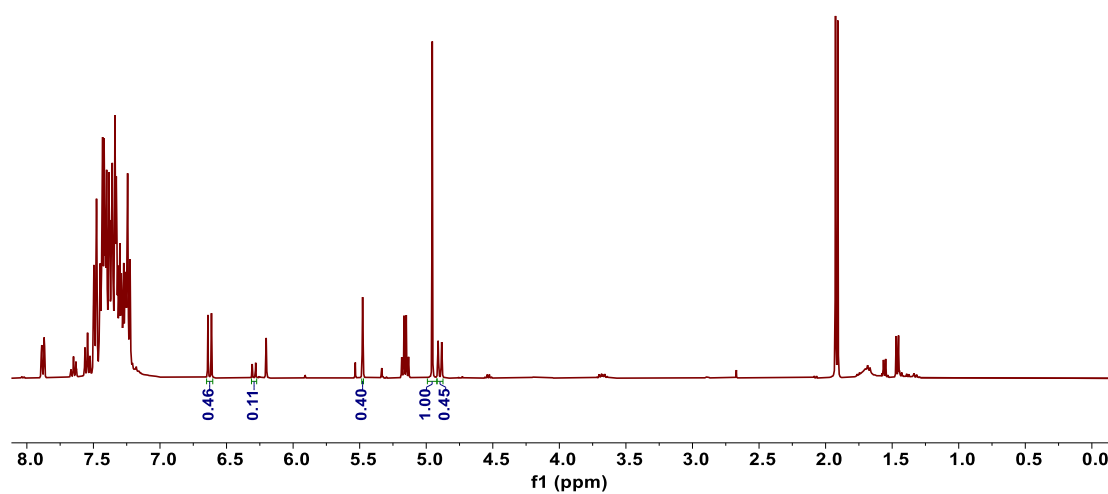

Figure S8.  $^1\text{H}$  NMR spectrum of cation-exchange experiment



# *S6. NMR Spectra*

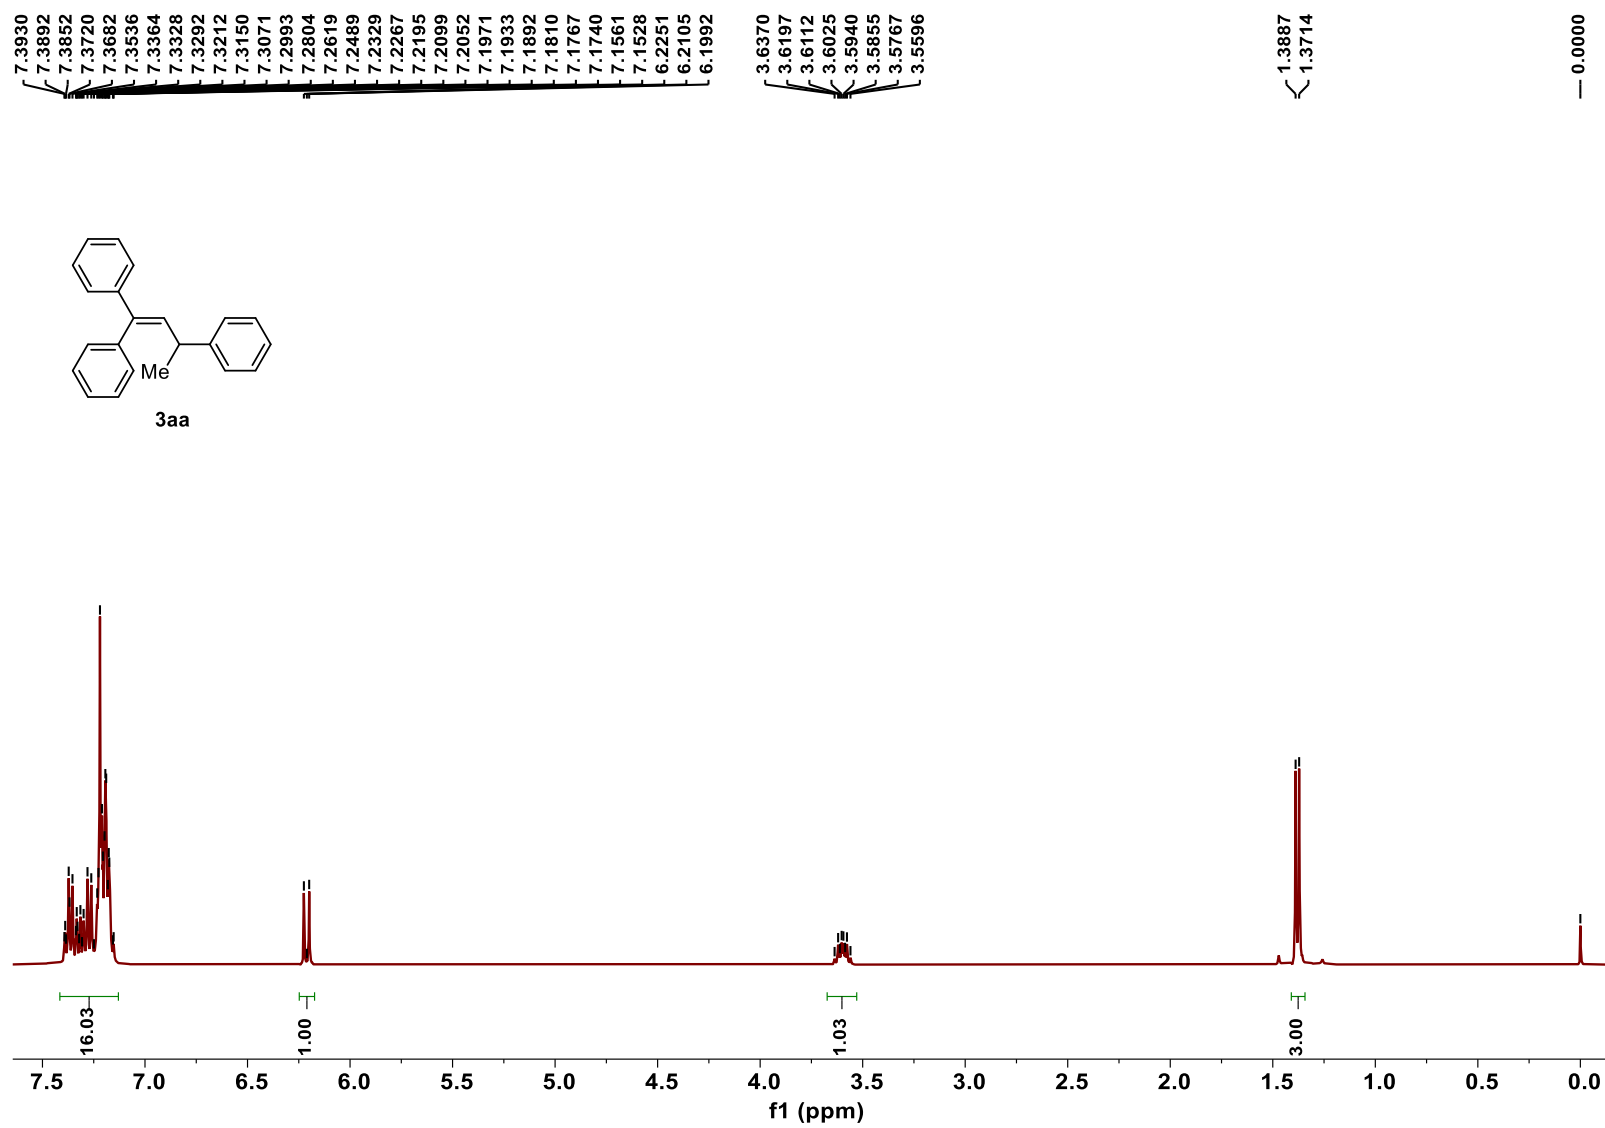



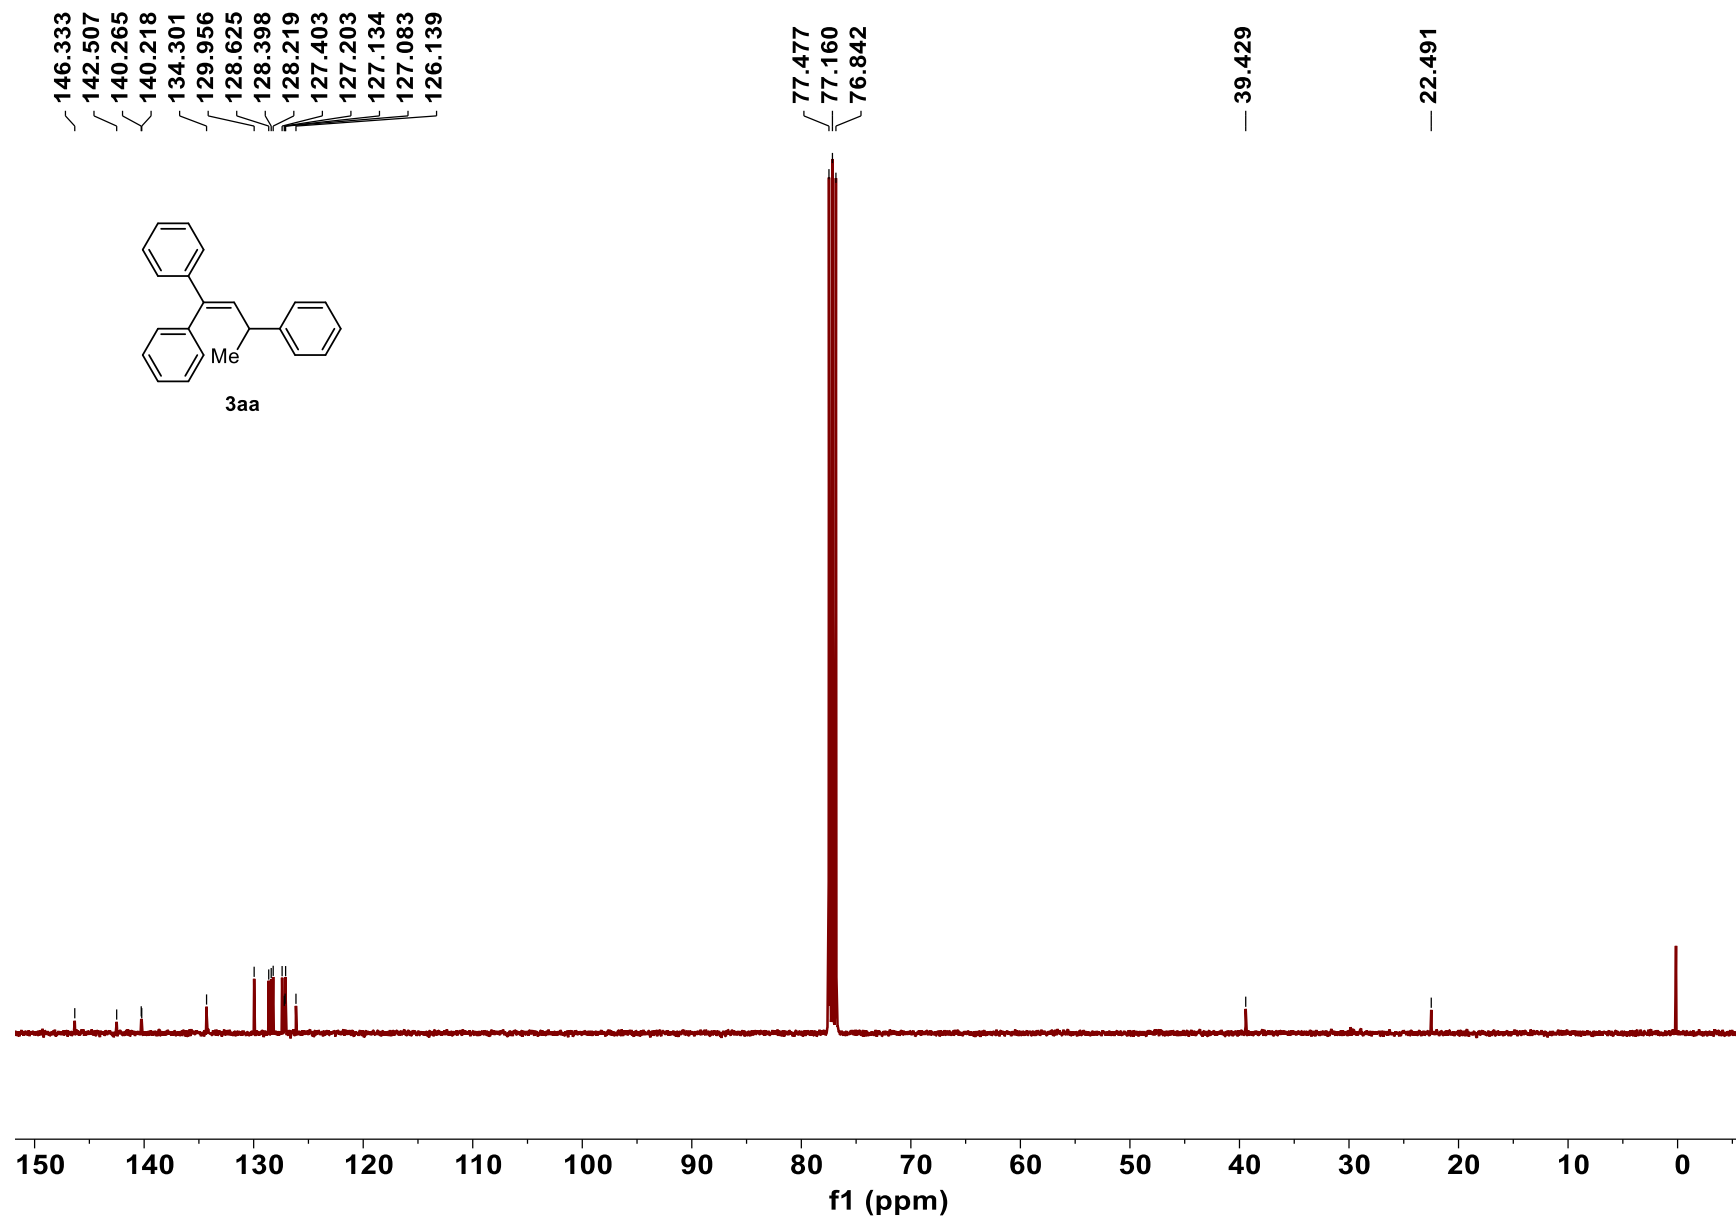



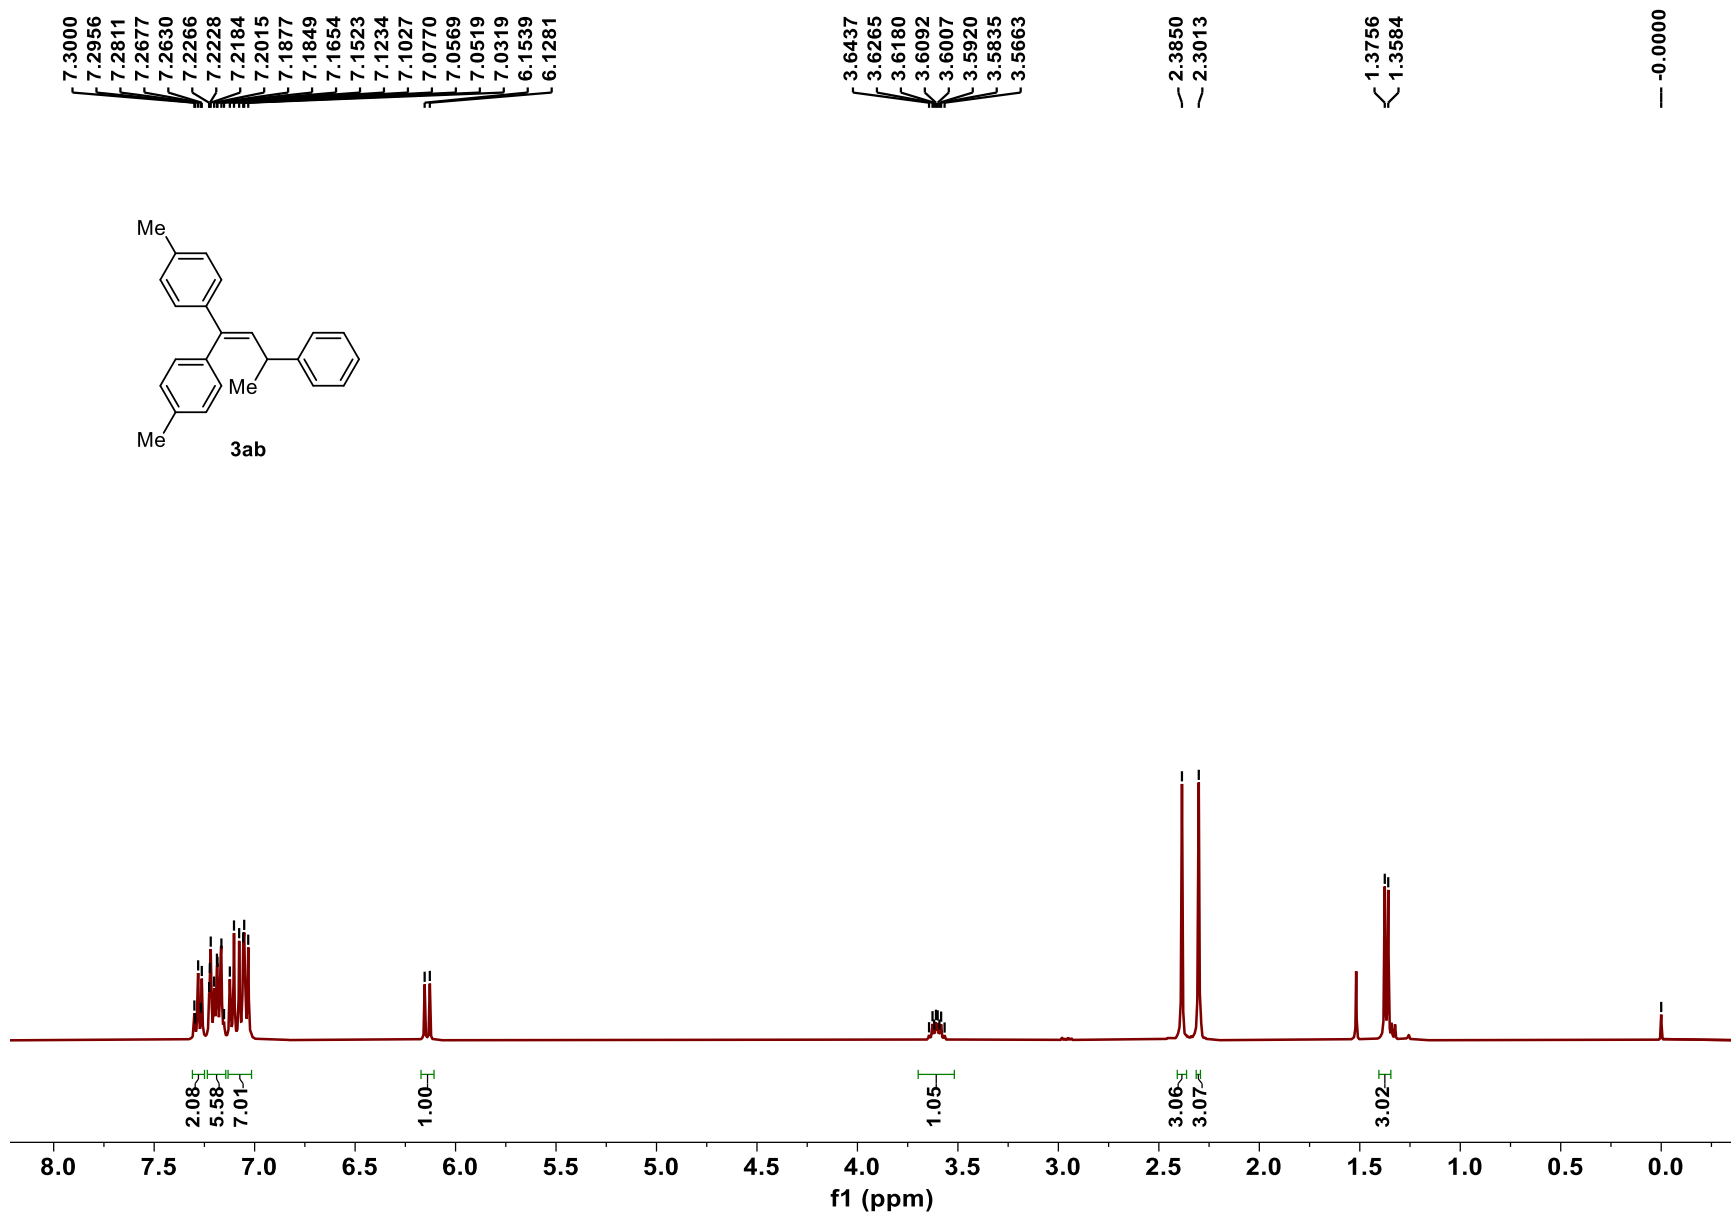



146.587  
 140.031  
 139.989  
 137.397  
 136.797  
 136.698  
 133.312  
 129.835  
 129.034  
 128.886  
 128.575  
 127.330  
 127.098  
 126.039

77.476  
 77.160  
 76.842

39.386

22.592  
 21.400  
 21.183

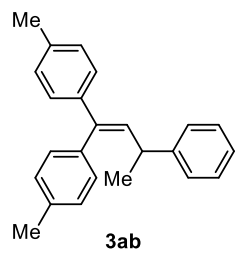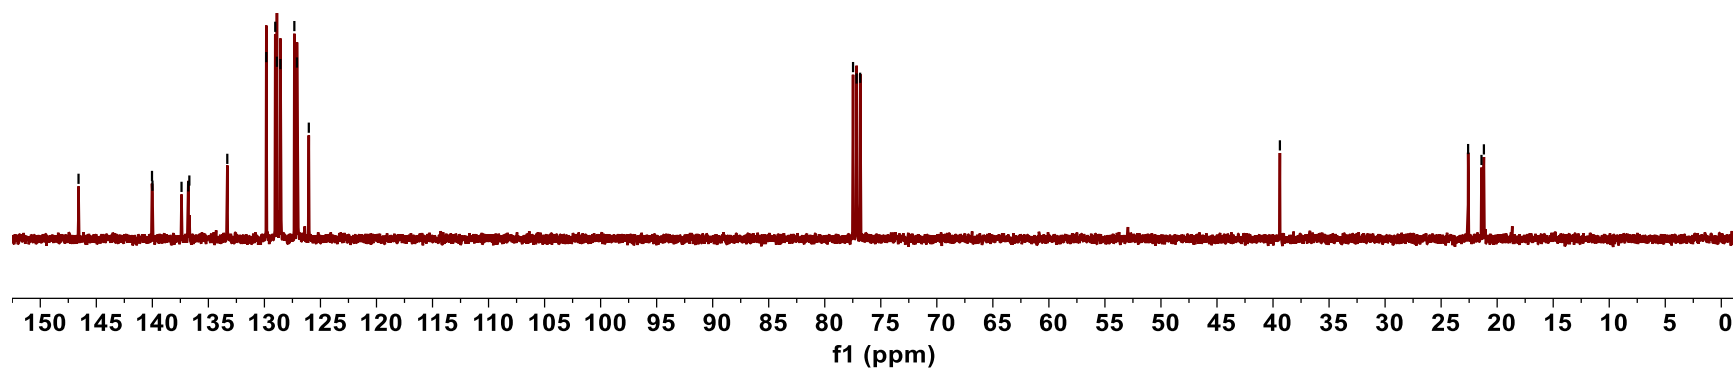



7.2991  
7.2812  
7.2620  
7.2461  
7.2119  
7.1940  
7.1717  
7.1495  
7.0902  
7.0686  
6.8961  
6.8745  
6.8033  
6.7813  
6.4132  
6.3869

4.8363  
4.8099

3.8316  
3.7795

0.0000

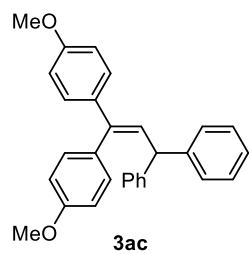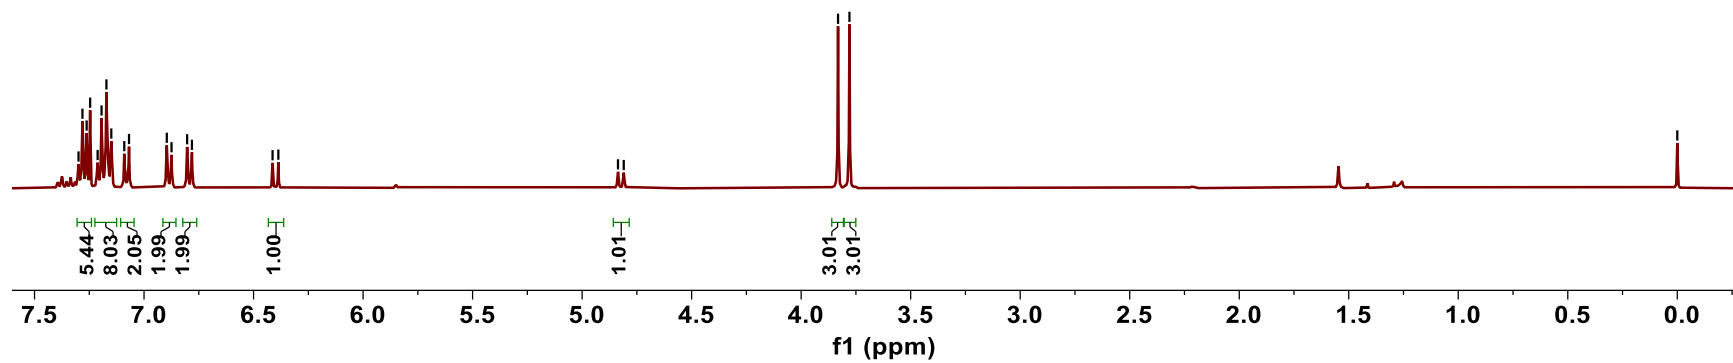



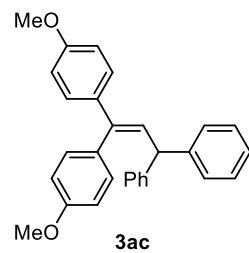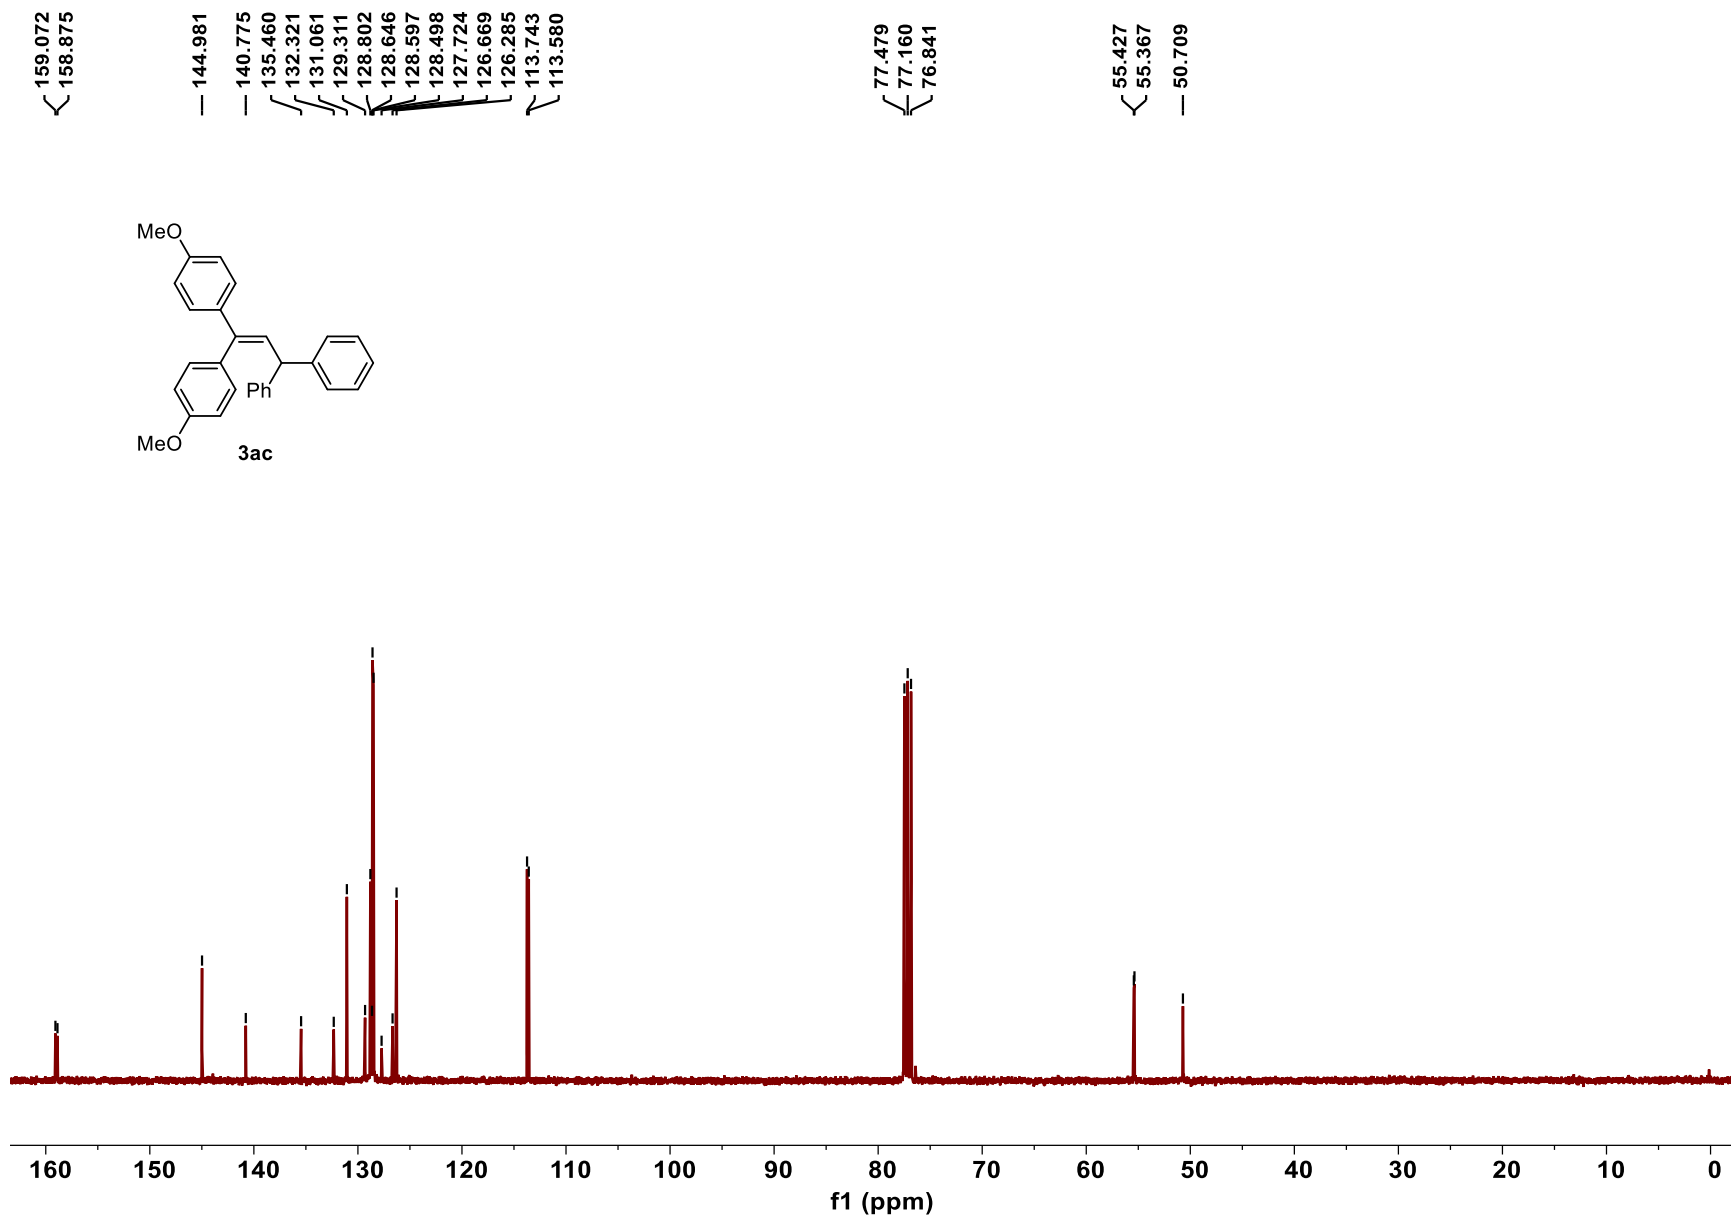



7.6835  
7.6631  
7.5208  
7.4998  
7.3332  
7.3292  
7.3201  
7.3157  
7.3119  
7.3053  
7.2962  
7.2915  
7.2853  
7.2718  
7.2552  
7.2511  
7.2389  
7.2351  
7.2316  
7.2219  
7.2166  
7.2116  
7.2019  
7.1984  
7.1912  
7.1871  
7.1821  
7.1740  
7.1702  
7.1671  
6.3731  
6.3467

3.5788  
3.5622  
3.5531  
3.5447  
3.5359  
3.5274  
3.5186  
3.5017

1.4199  
1.4027

0.0000

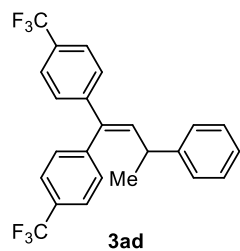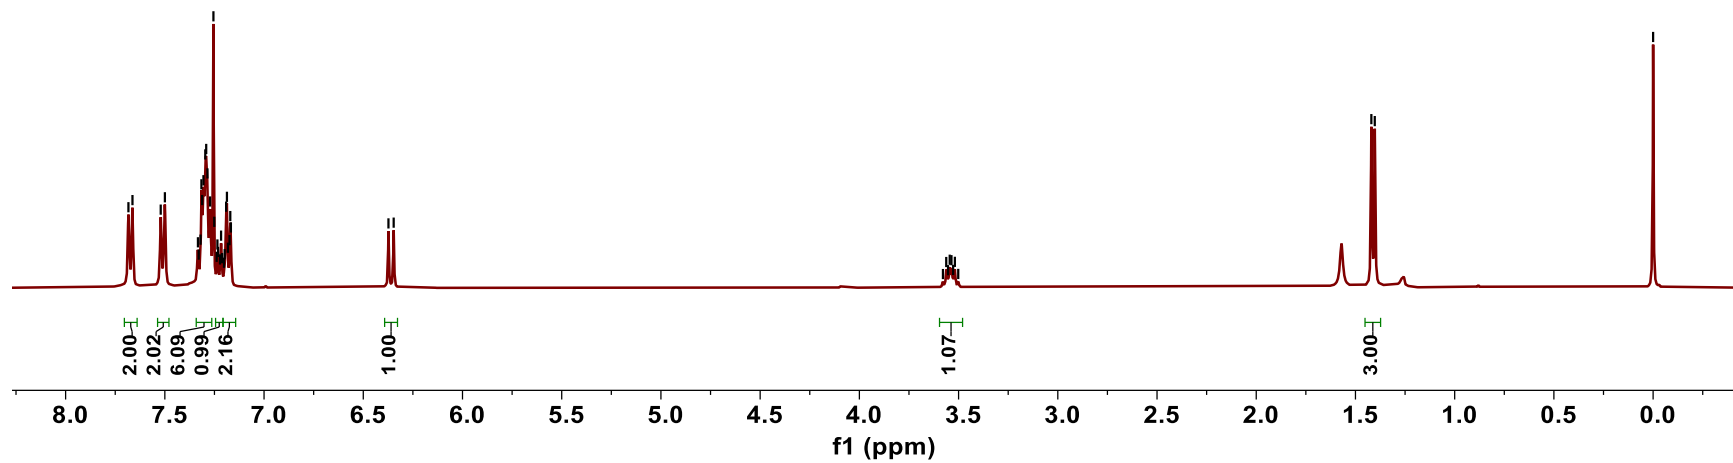



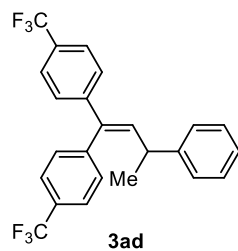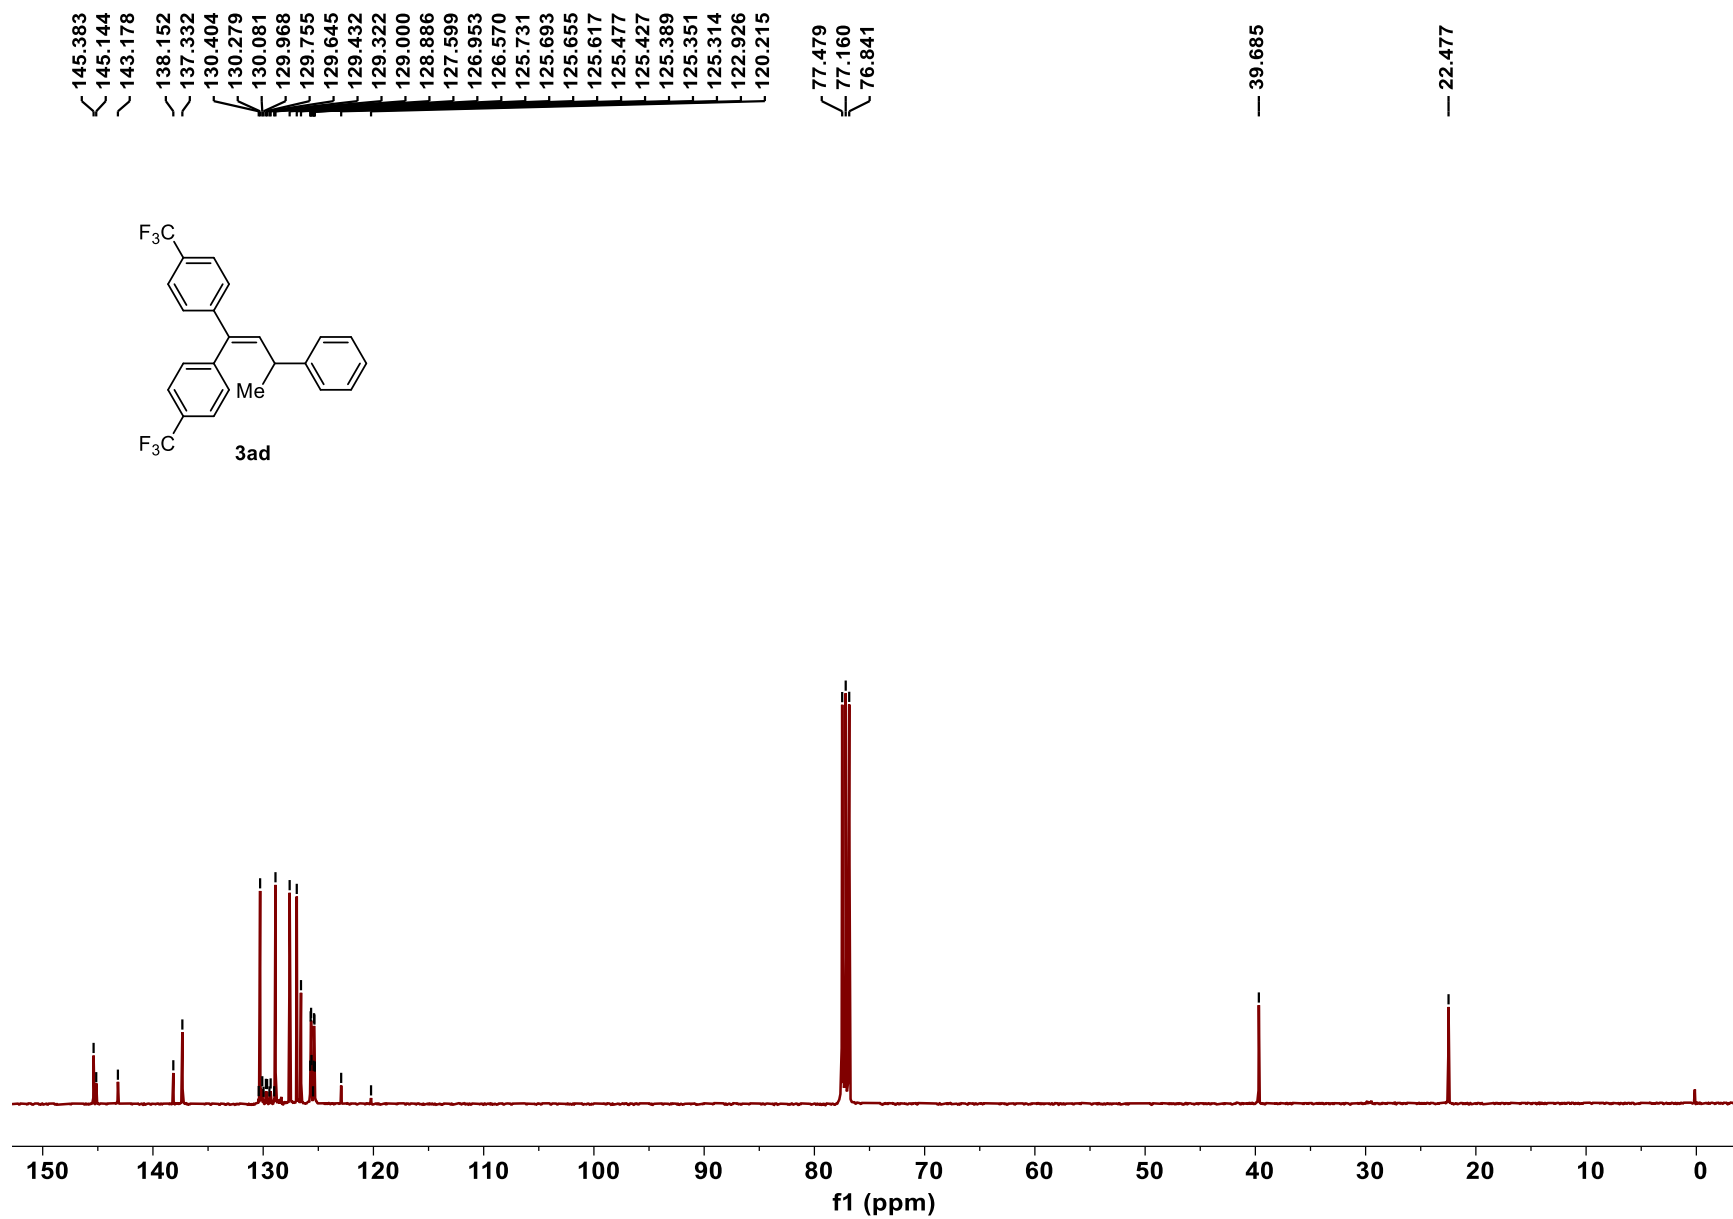



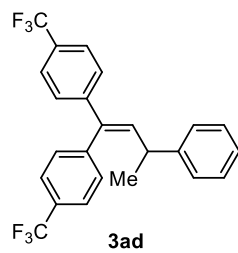

{  
-62.5383  
-62.5474

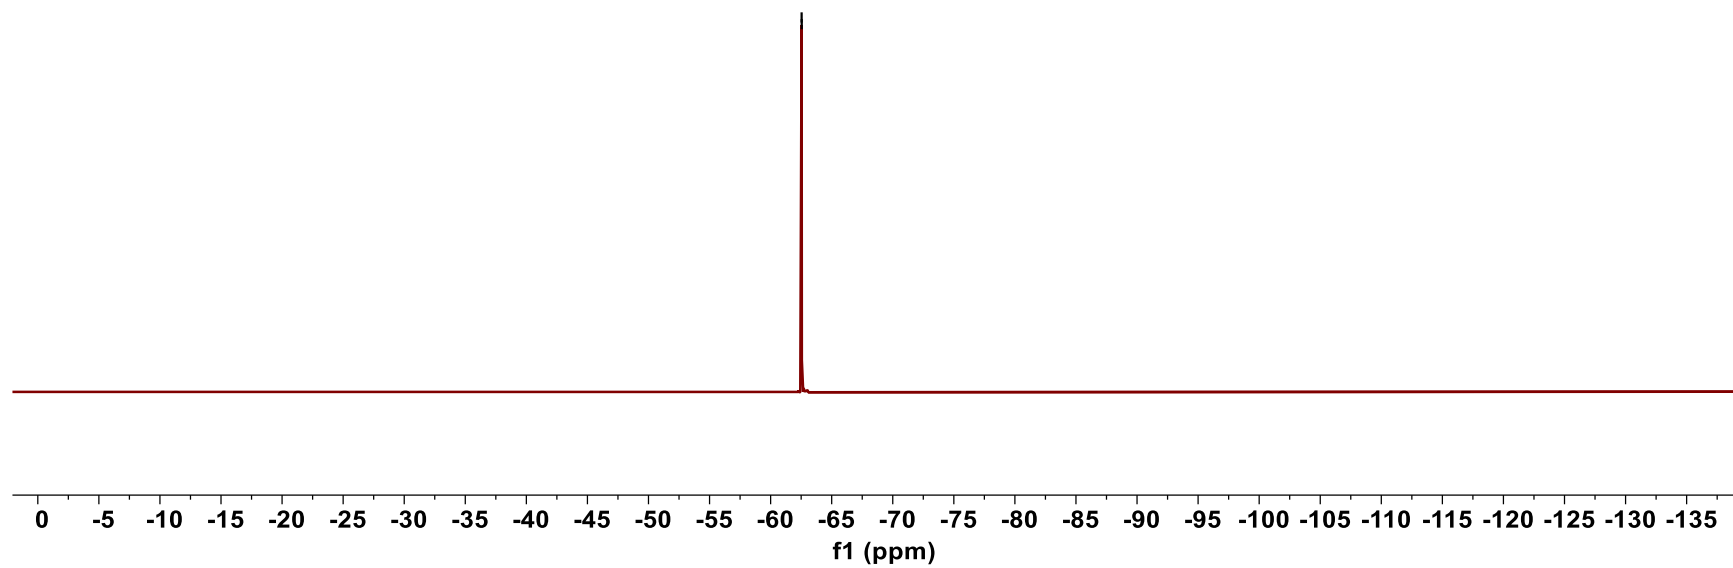

S39



7.3141  
7.3094  
7.2994  
7.2943  
7.2818  
7.2765  
7.2414  
7.2131  
7.2094  
7.2059  
7.1918  
7.1874  
7.1764  
7.1714  
7.1655  
7.1576  
7.1488  
7.1413  
7.1354  
7.1272  
7.1191  
7.1112  
7.1053  
7.0984  
7.0918  
7.0858  
7.0761  
7.0701  
7.0642  
7.0538  
7.0482  
6.9613  
6.9535  
6.9478  
6.9403  
6.9369  
6.9319  
6.9265  
6.9152  
6.9099  
6.1652  
6.1395  
3.5842  
3.5669  
3.5584  
3.5497  
3.5412  
3.5324  
3.5240  
3.5067

1.3879  
1.3707

0.0000

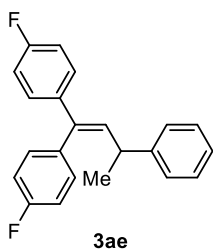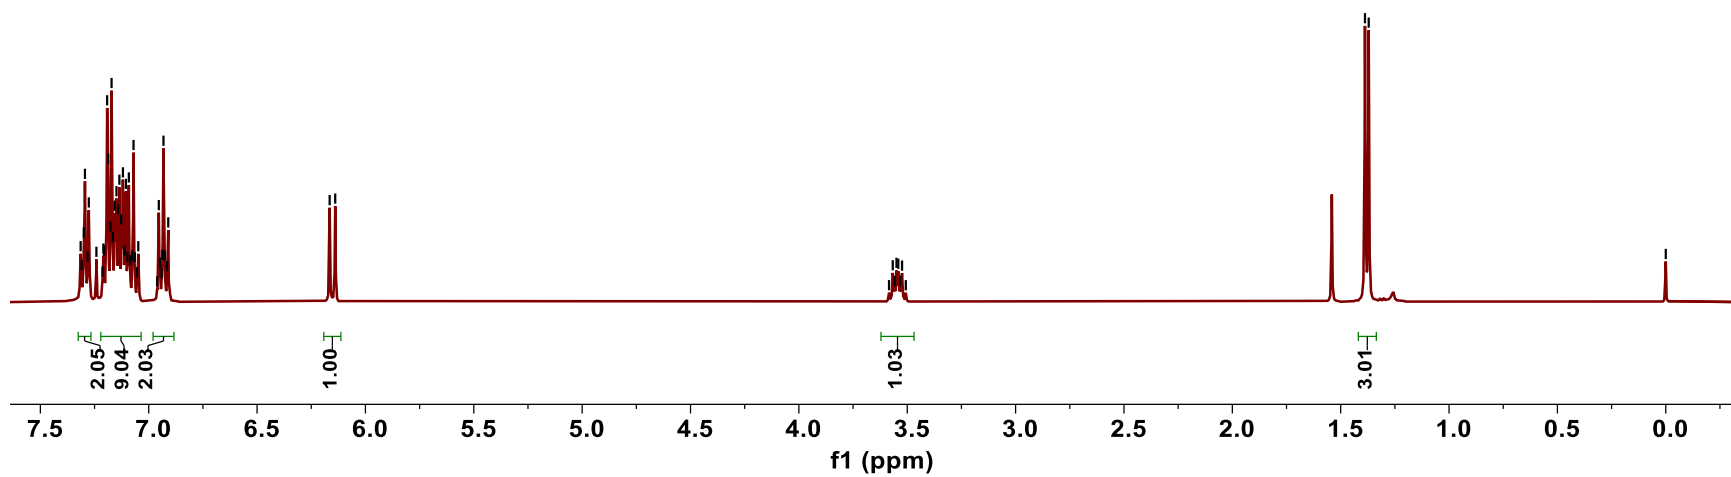

S40



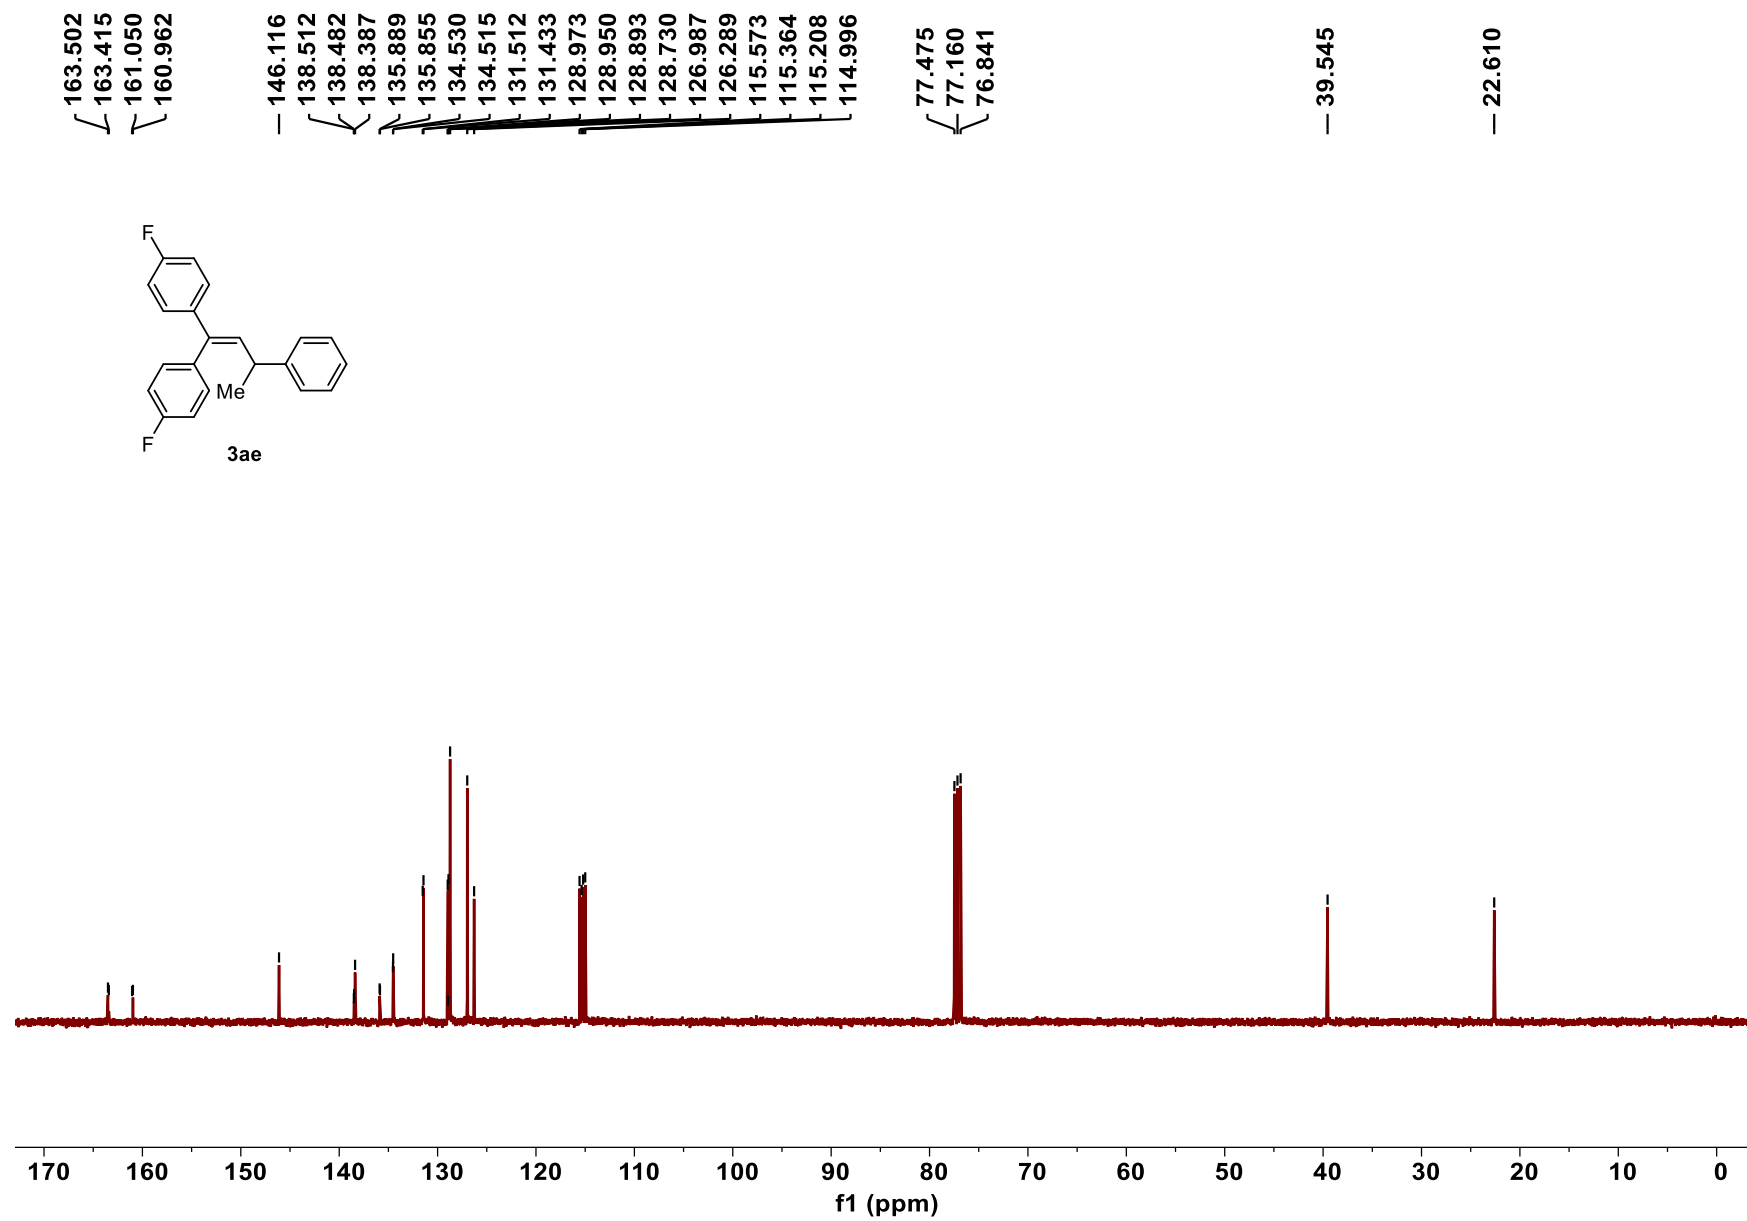



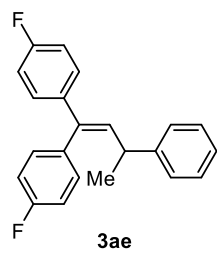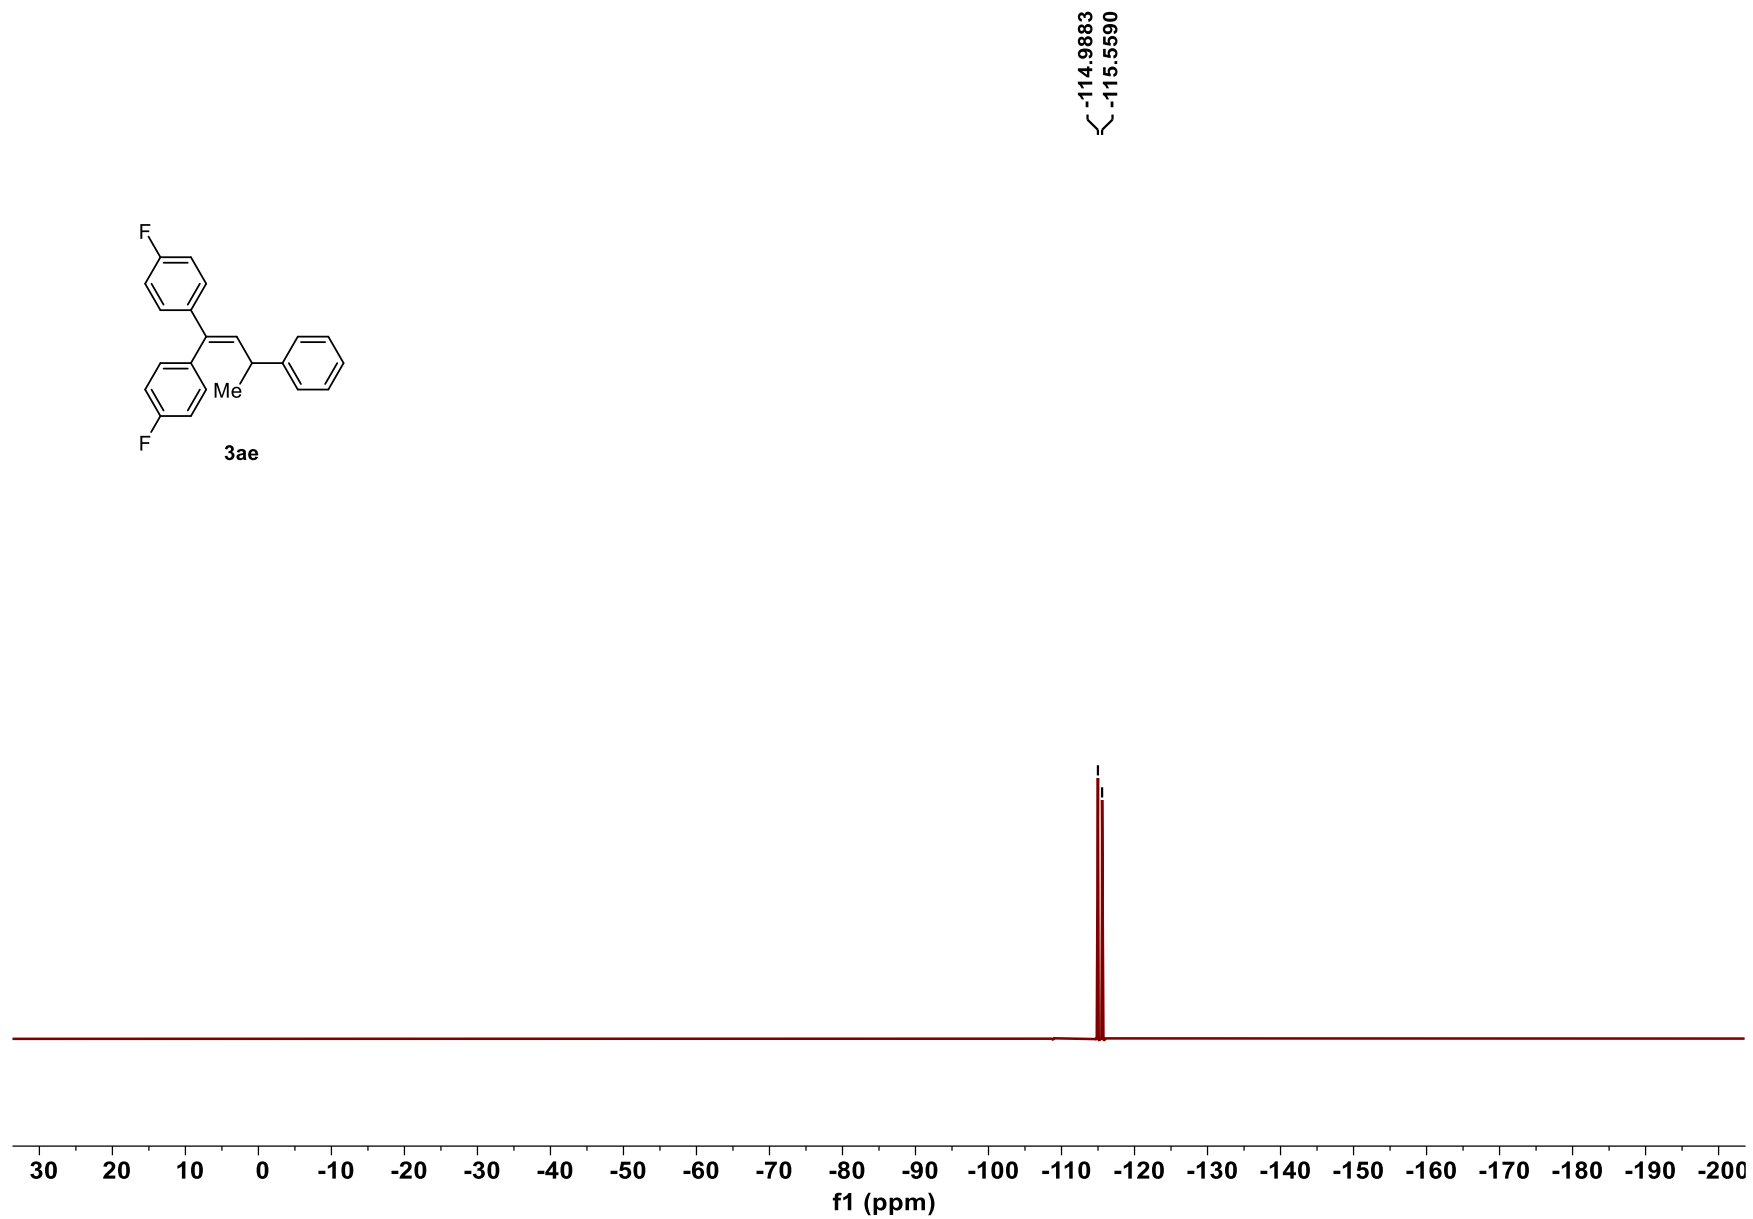



7.5182  
7.5135  
7.5026  
7.4976  
7.3659  
7.3608  
7.3495  
7.3445  
7.3097  
7.2919  
7.2768  
7.2727  
7.2222  
7.2072  
7.2037  
7.1890  
7.1802  
7.1761  
7.1705  
7.1592  
7.0535  
7.0485  
7.0328  
7.0178  
7.0128  
6.2248  
6.1987

3.5773  
3.5600  
3.5512  
3.5428  
3.5340  
3.5255  
3.5171  
3.4998

1.3794  
1.3622

0.0000

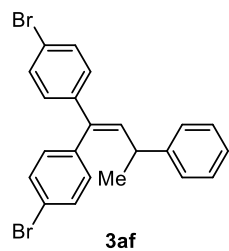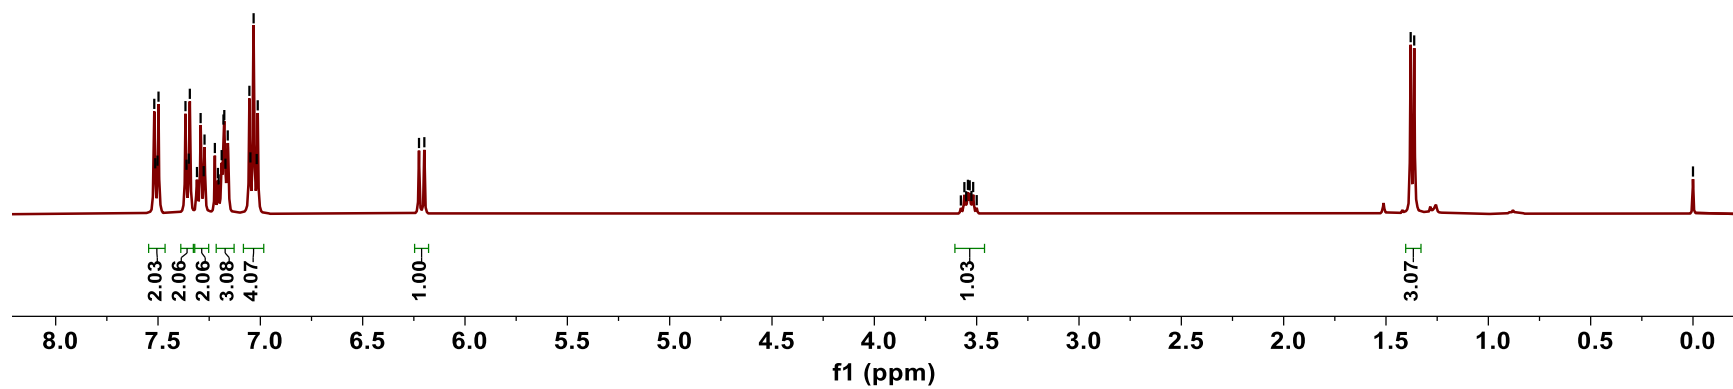



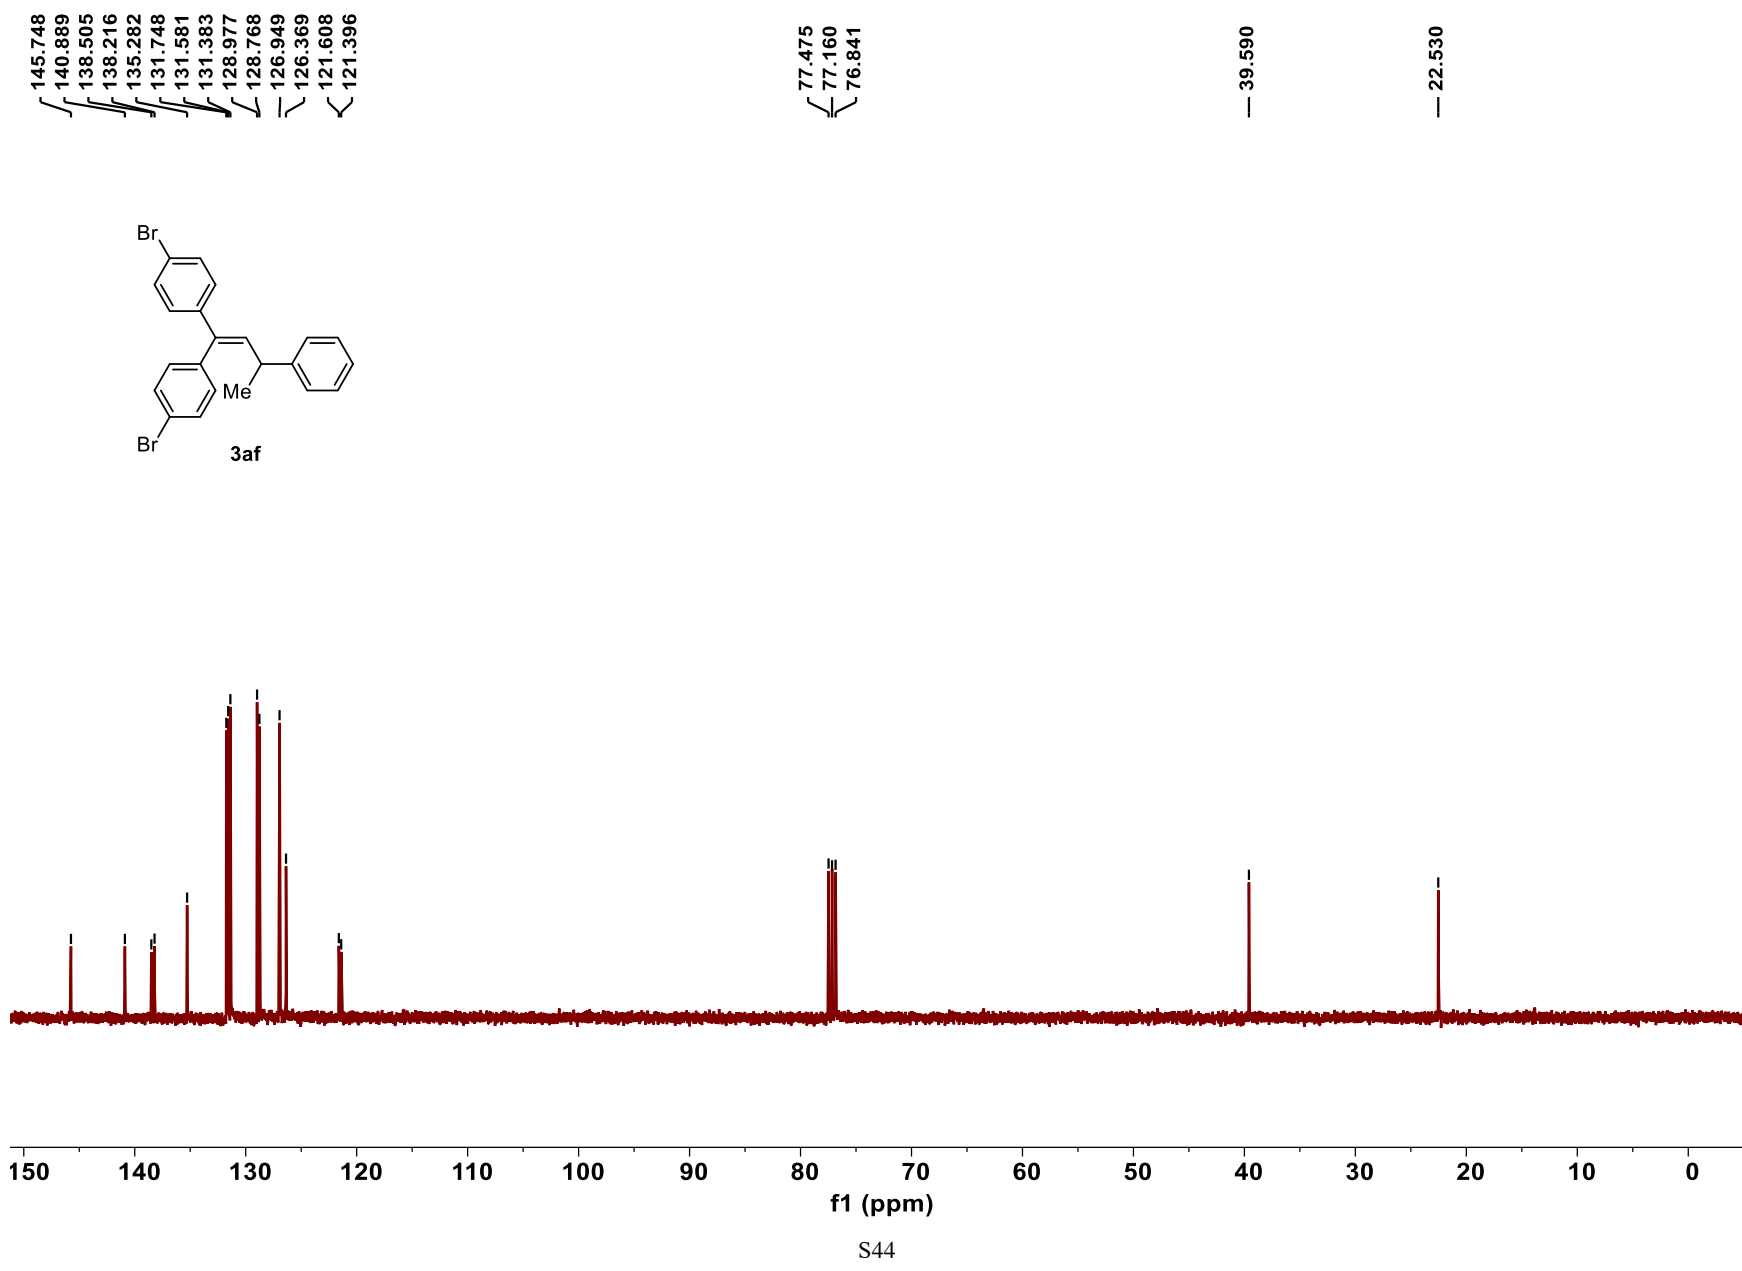



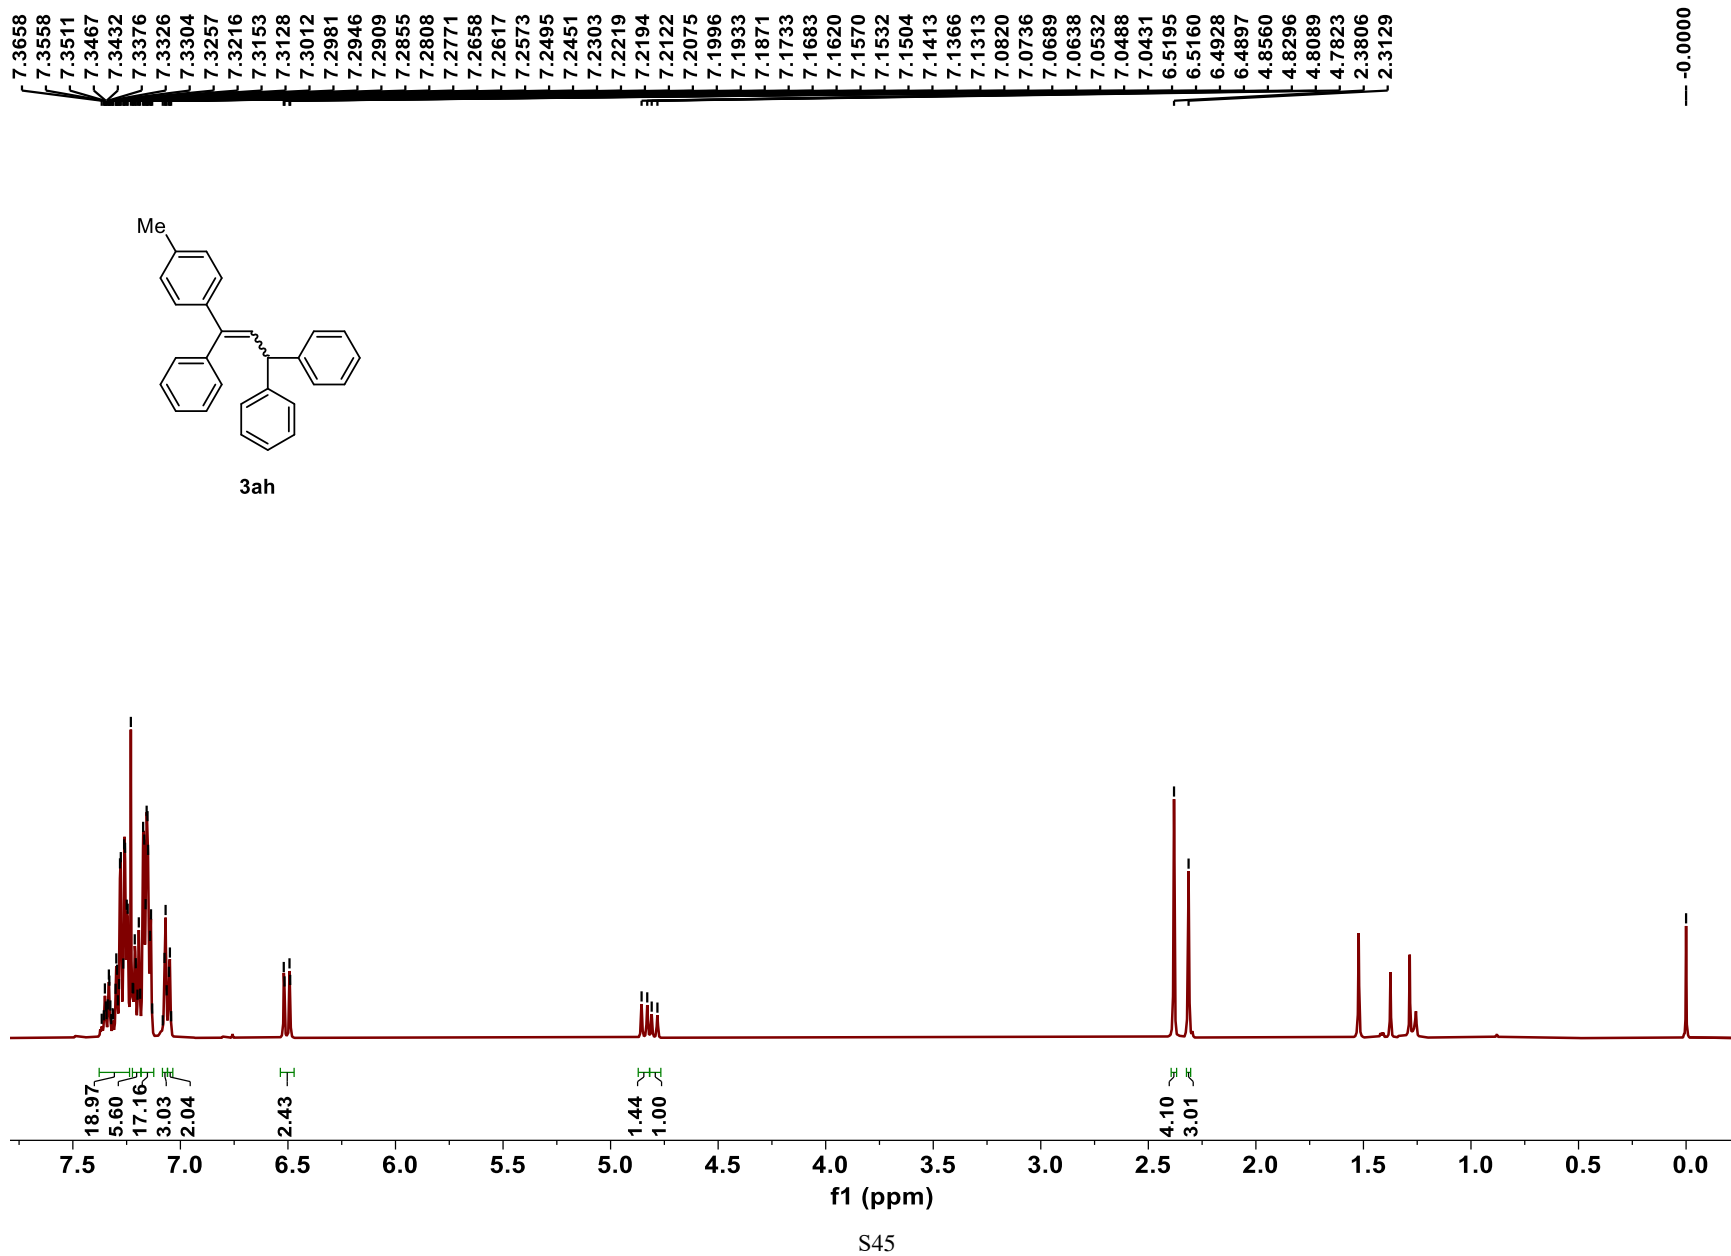



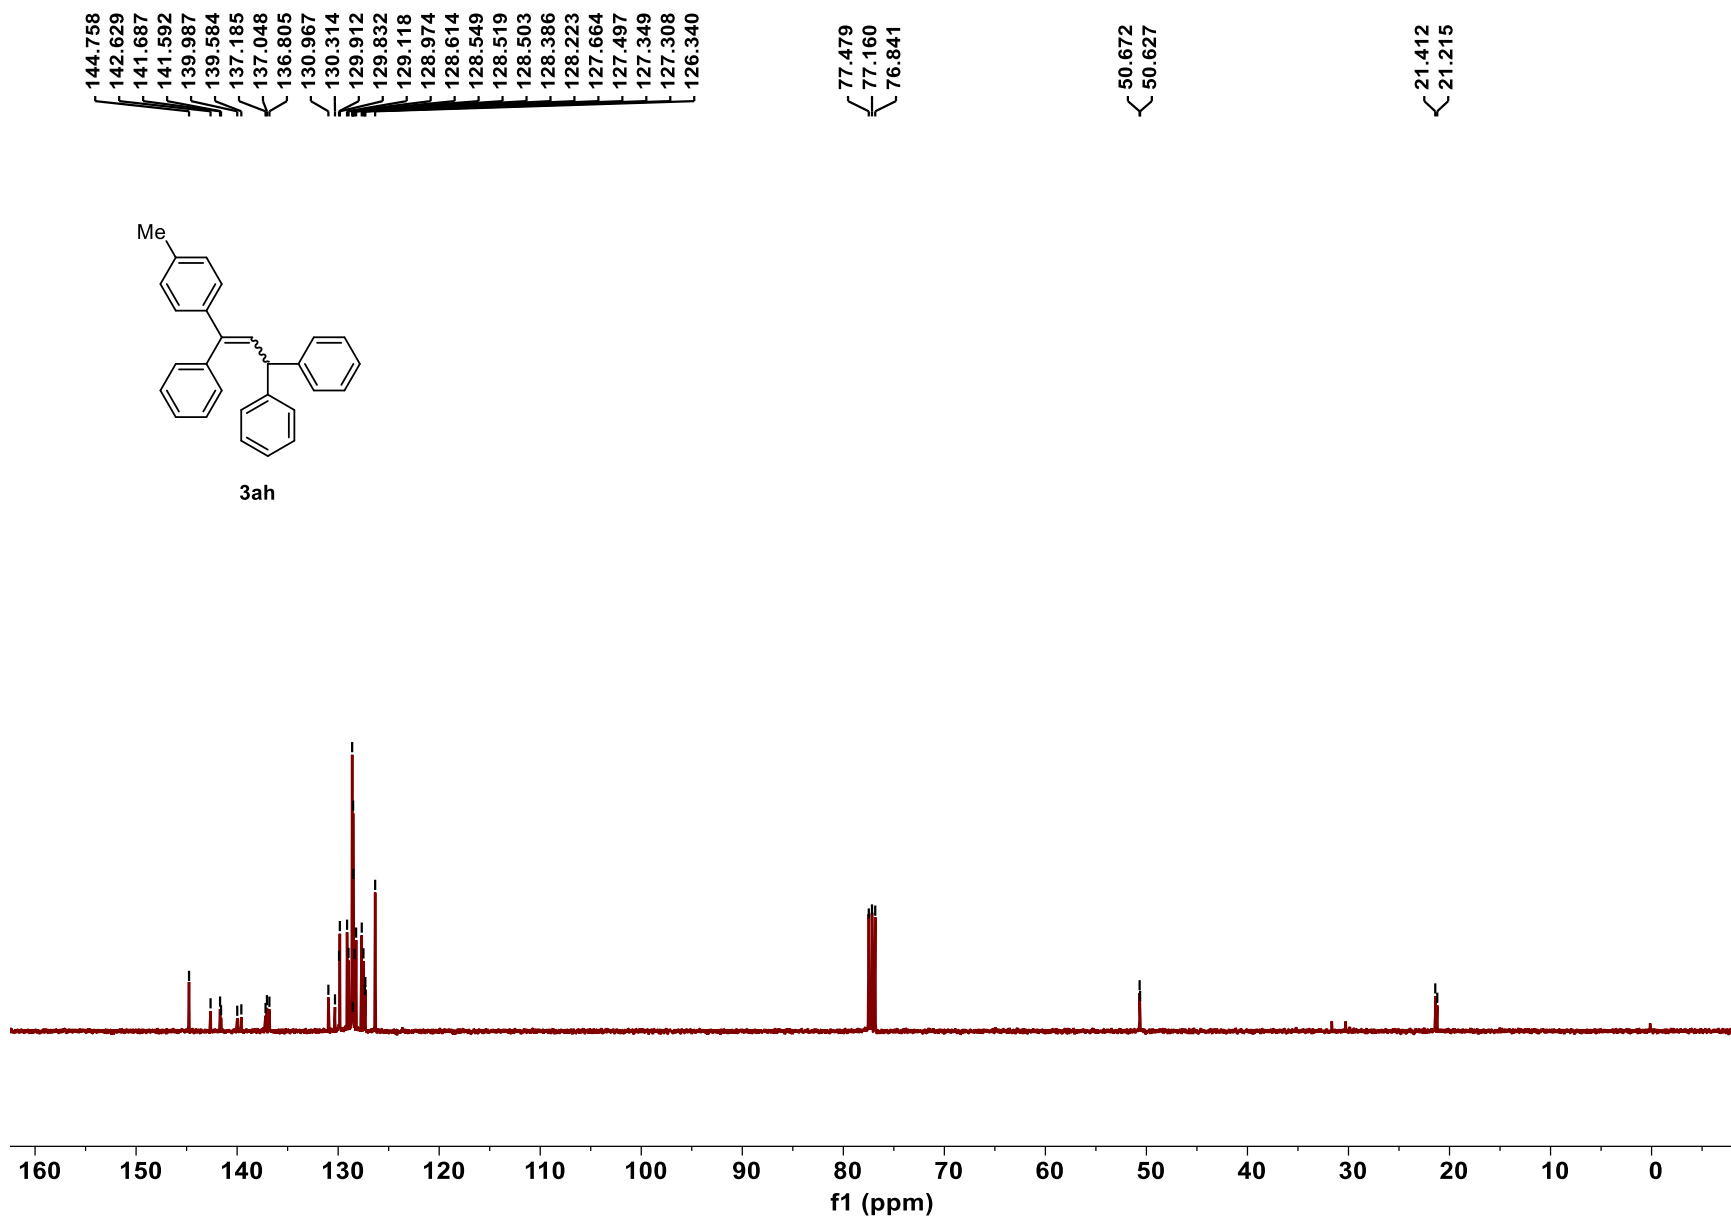



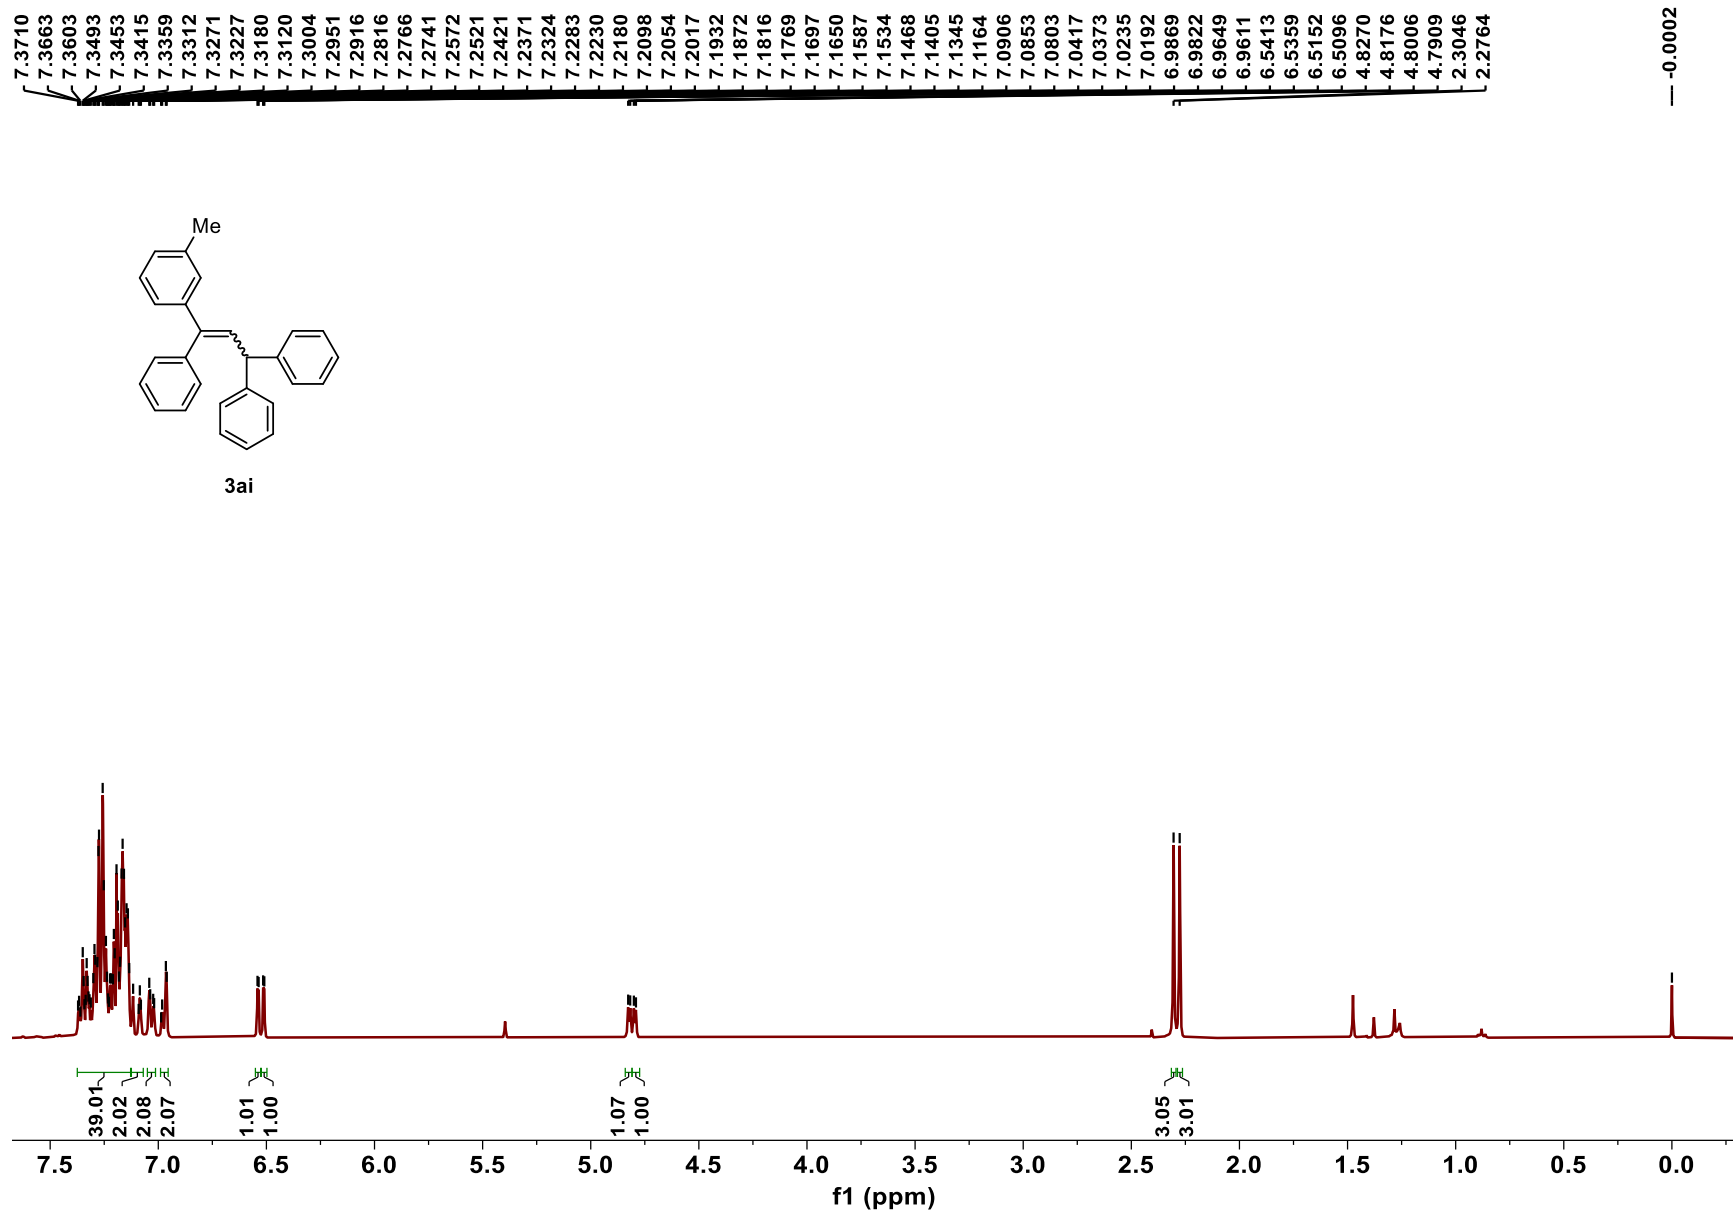



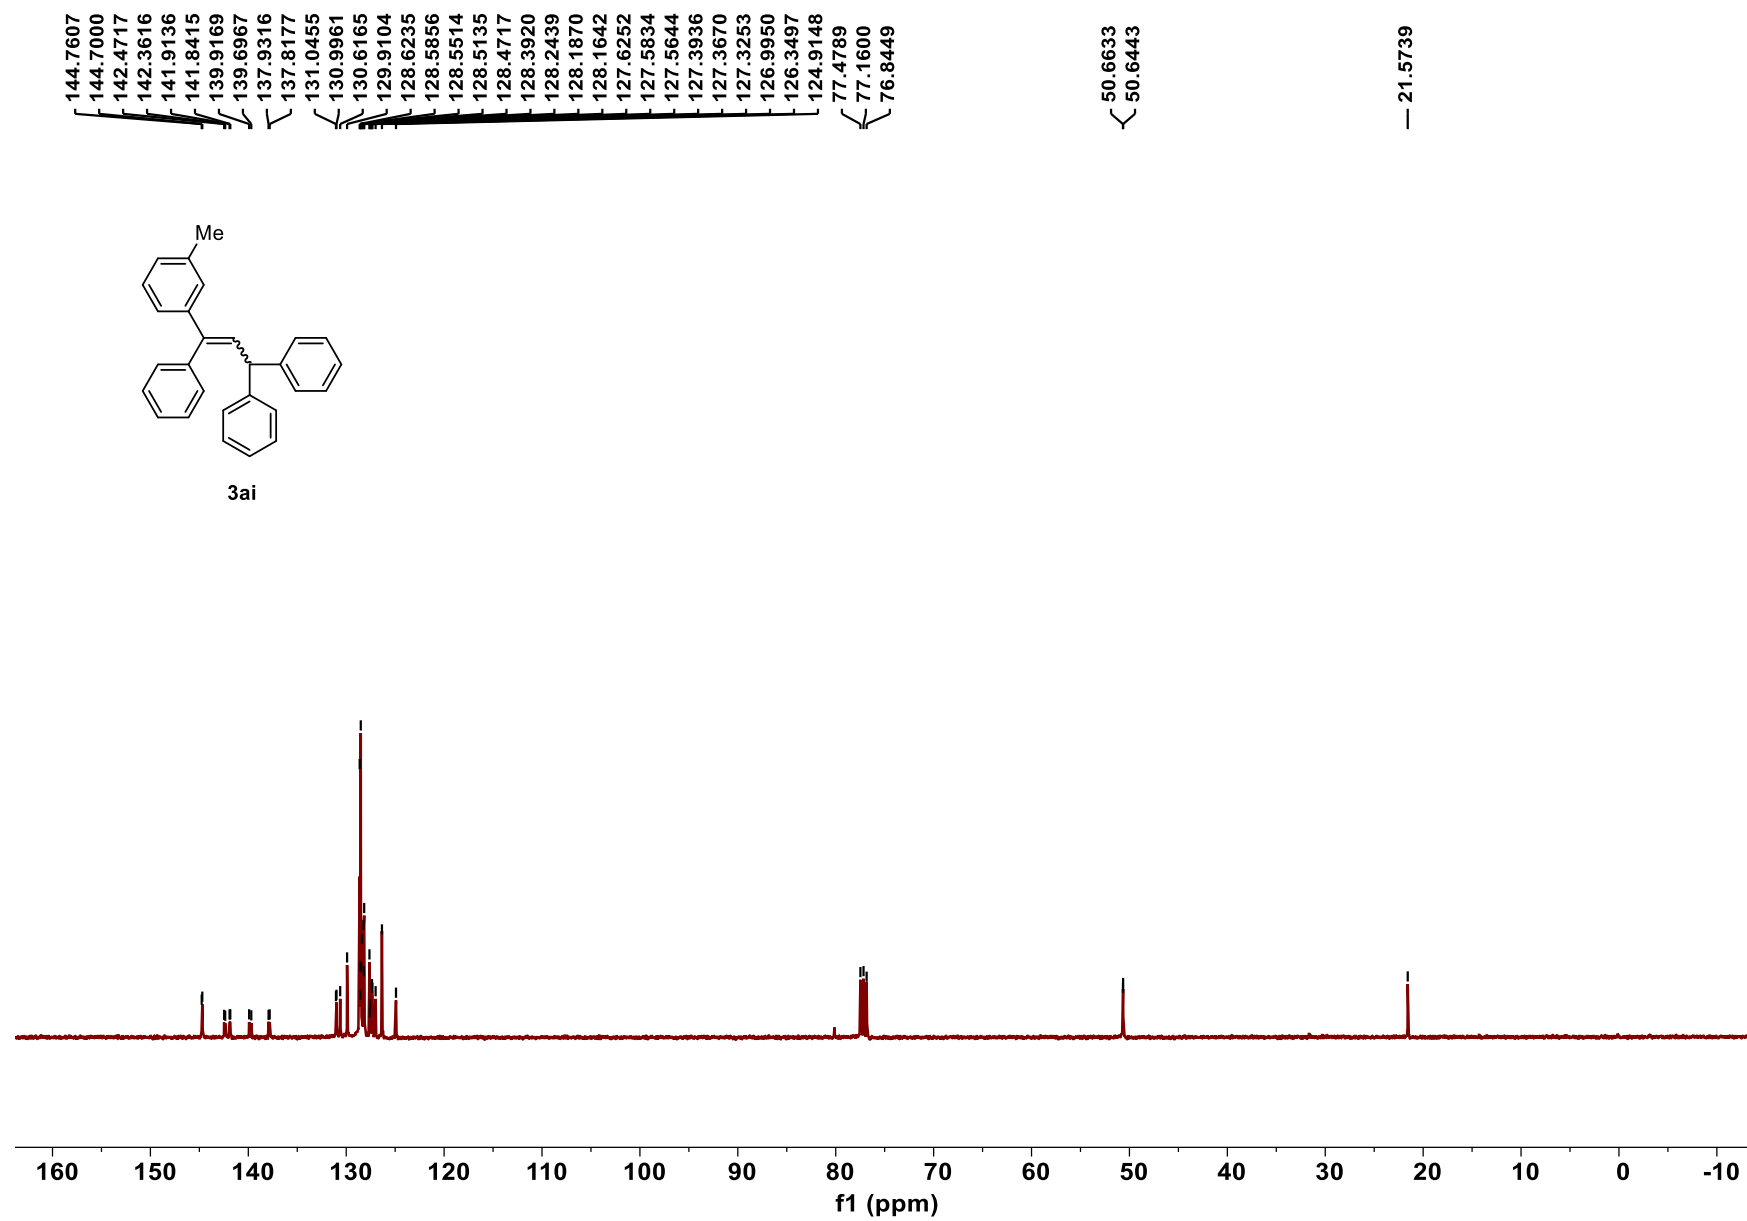



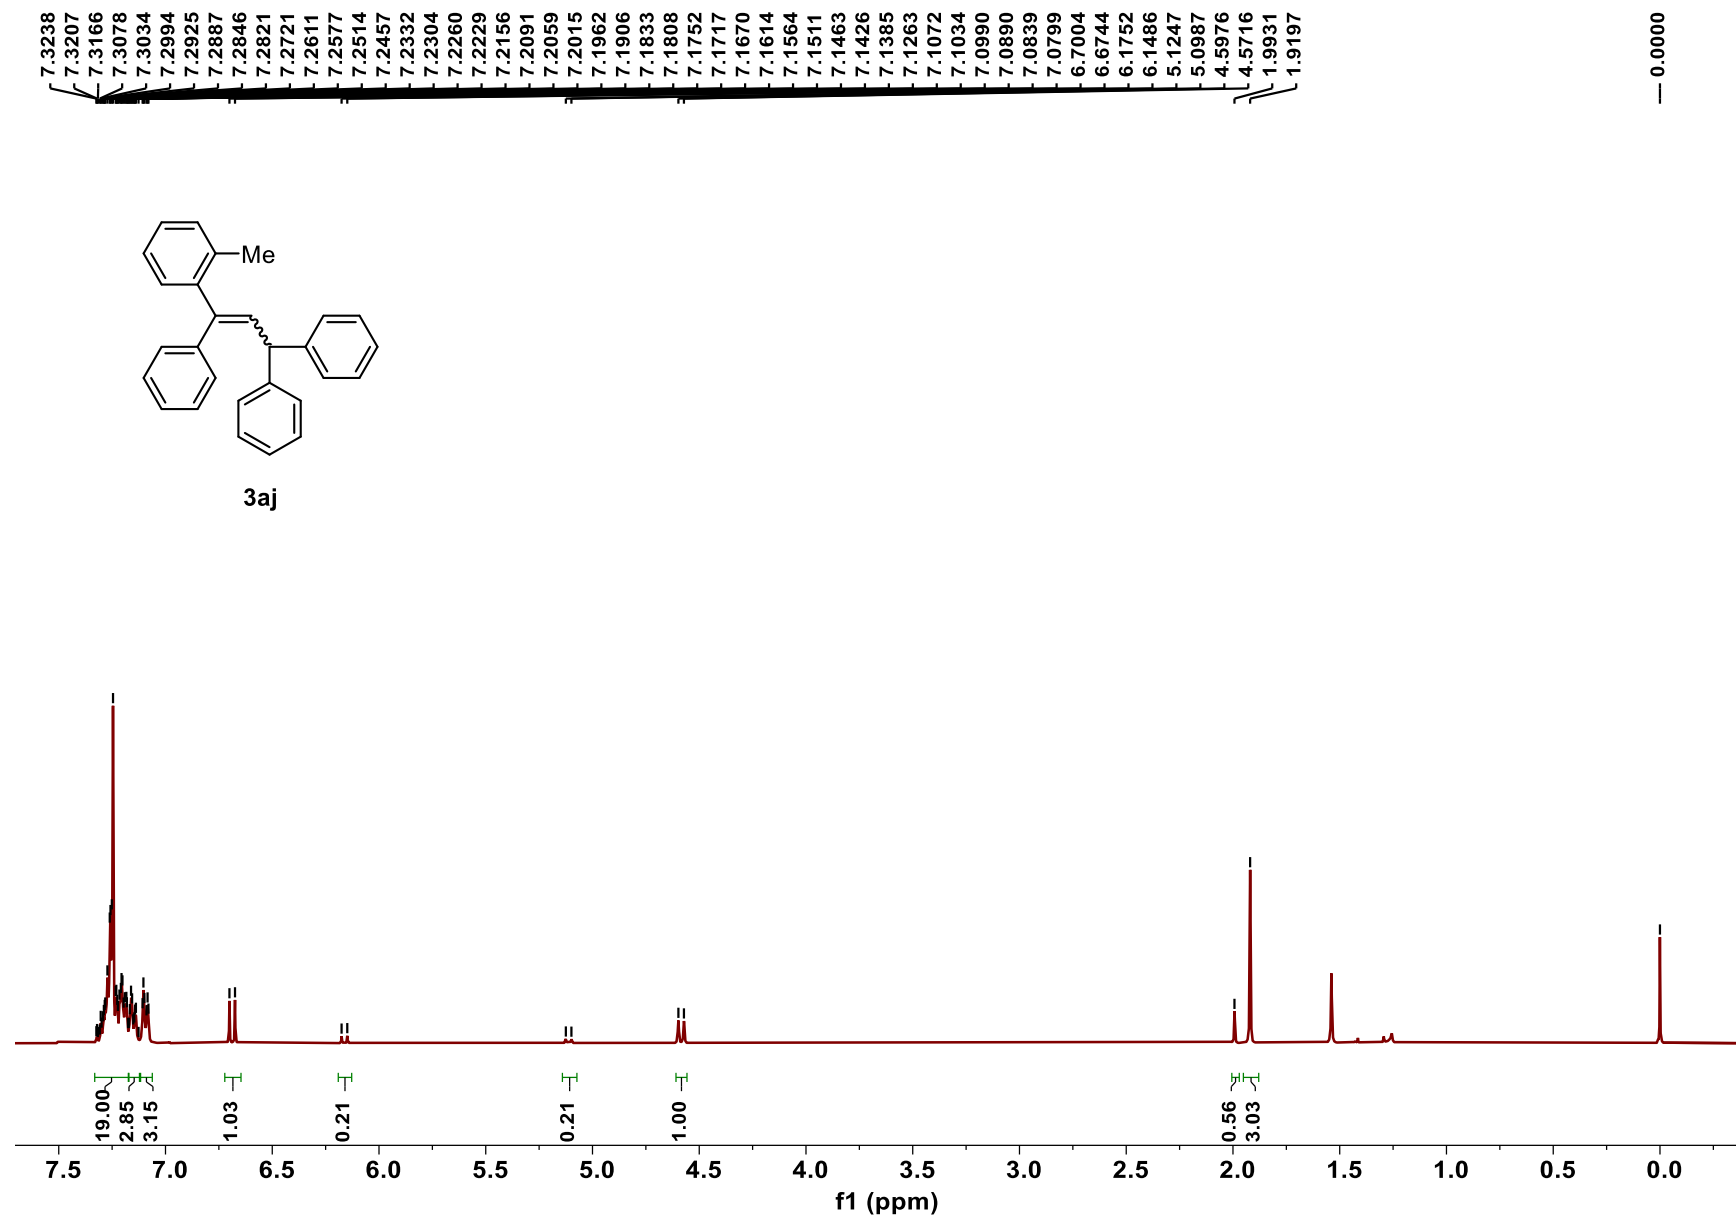







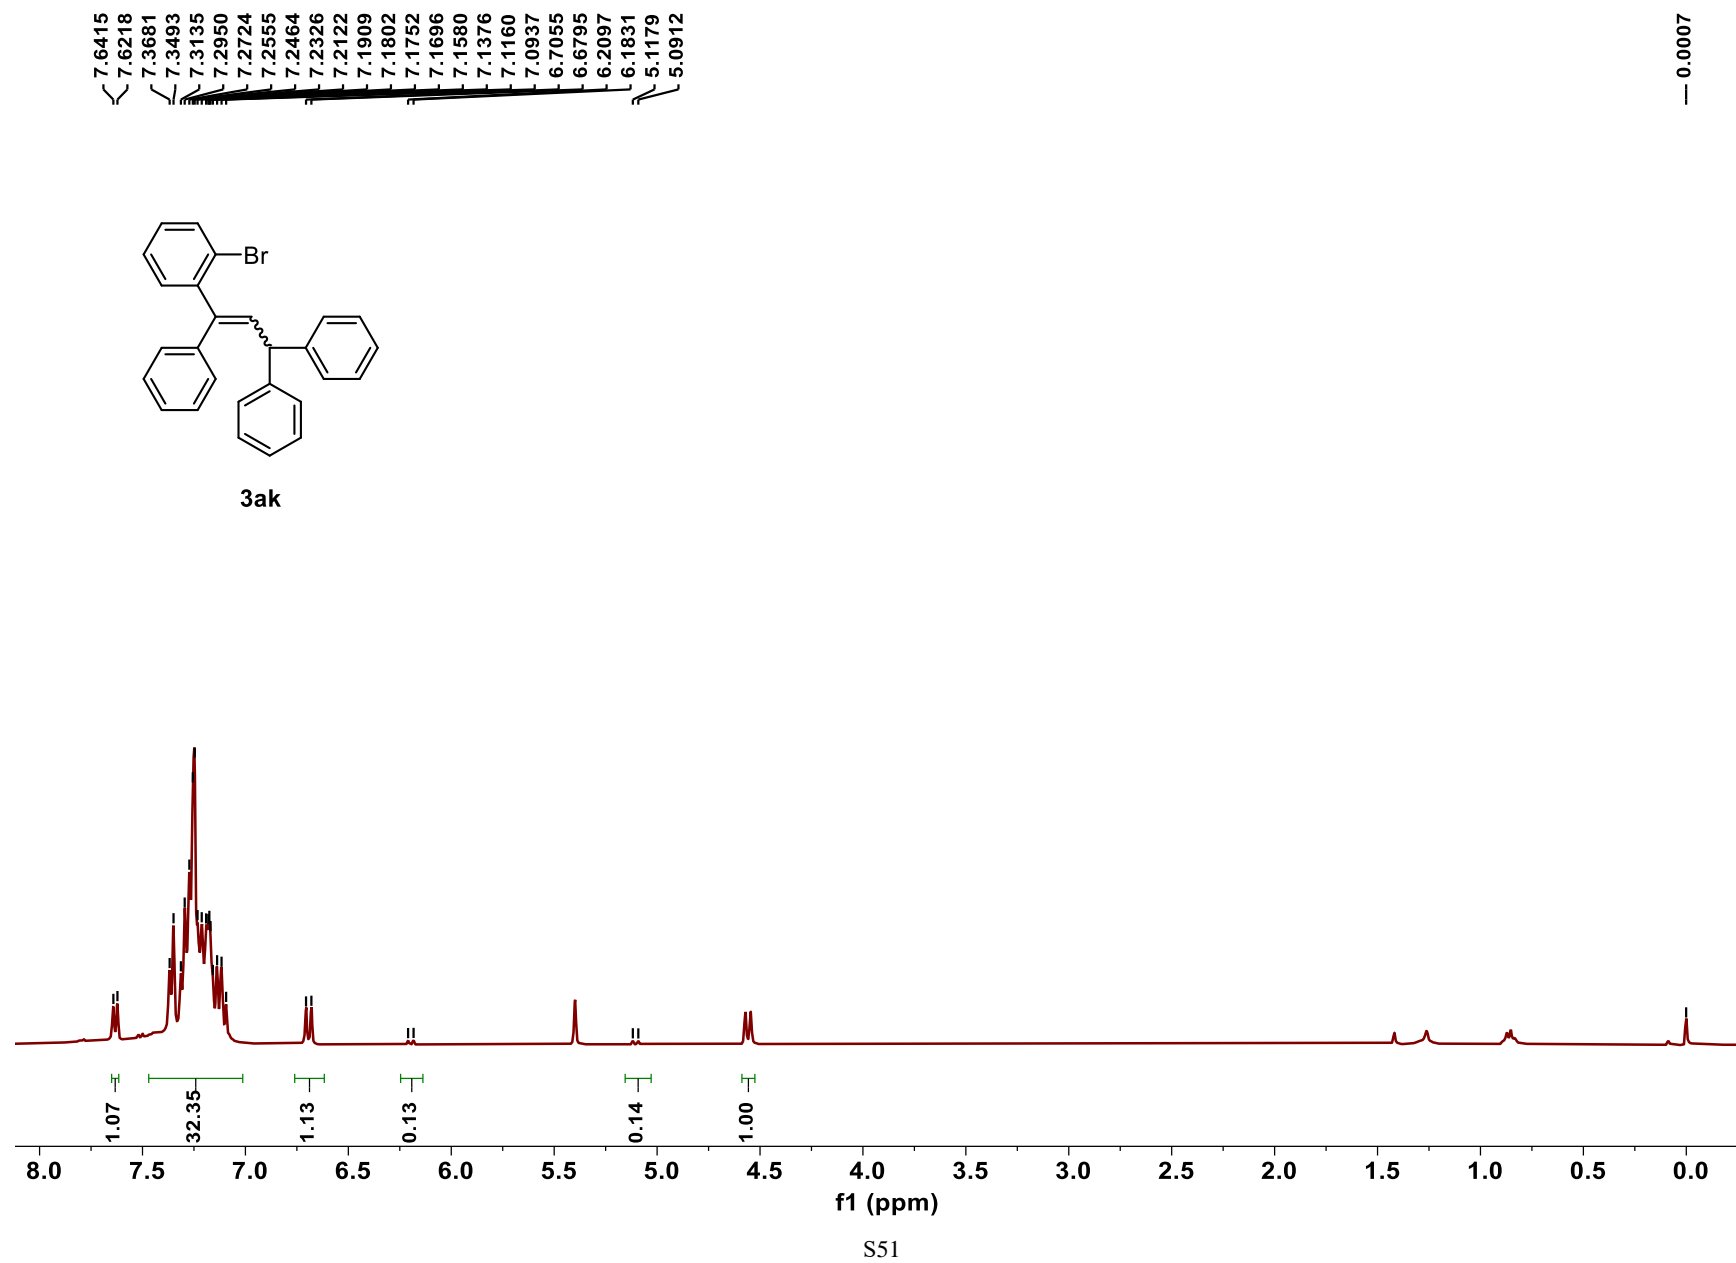



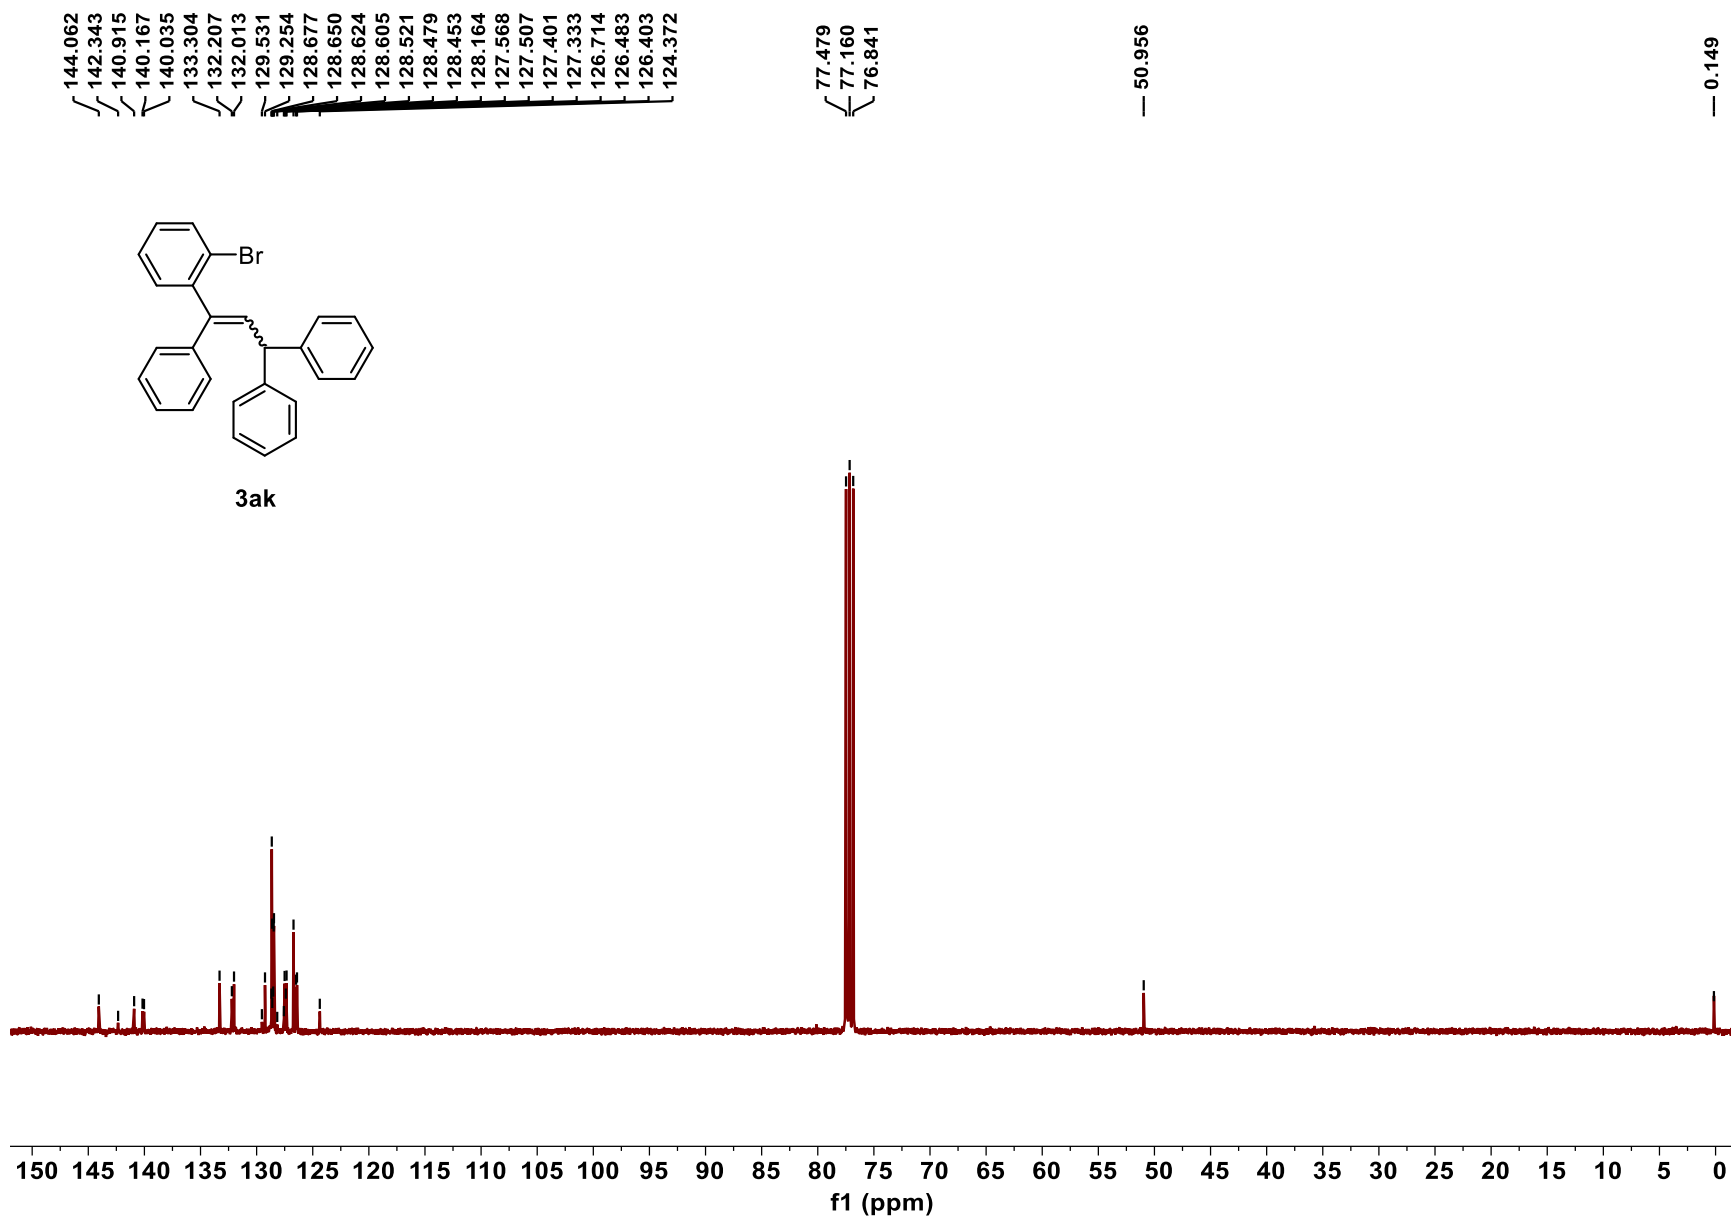



7.5801  
7.5758  
7.5707  
7.5596  
7.5562  
7.3513  
7.3393  
7.3353  
7.3293  
7.3209  
7.3109  
7.3075  
7.3028  
7.2920  
7.2690  
7.2512  
7.2445  
7.2370  
7.2311  
7.2226  
7.2193  
6.6845  
6.6610  
5.3745  
5.3510

— 0.0000

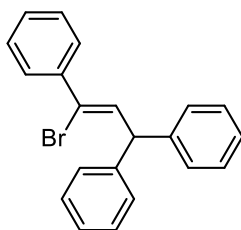

3al

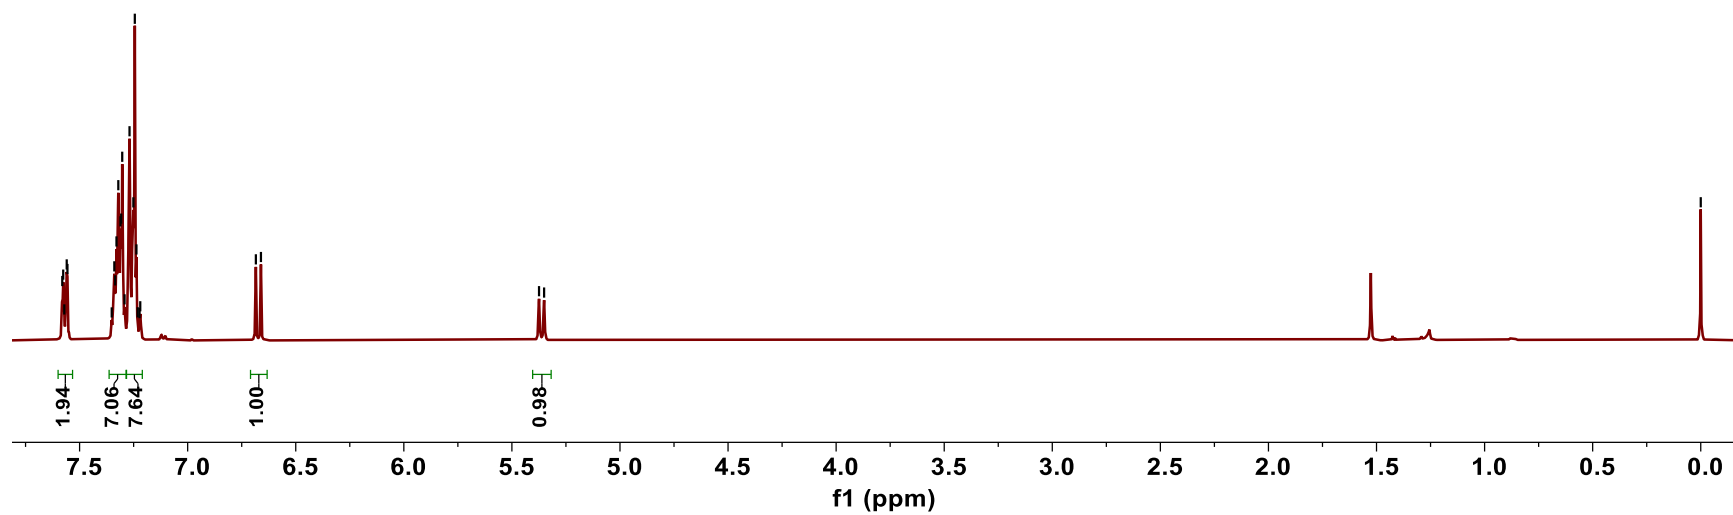



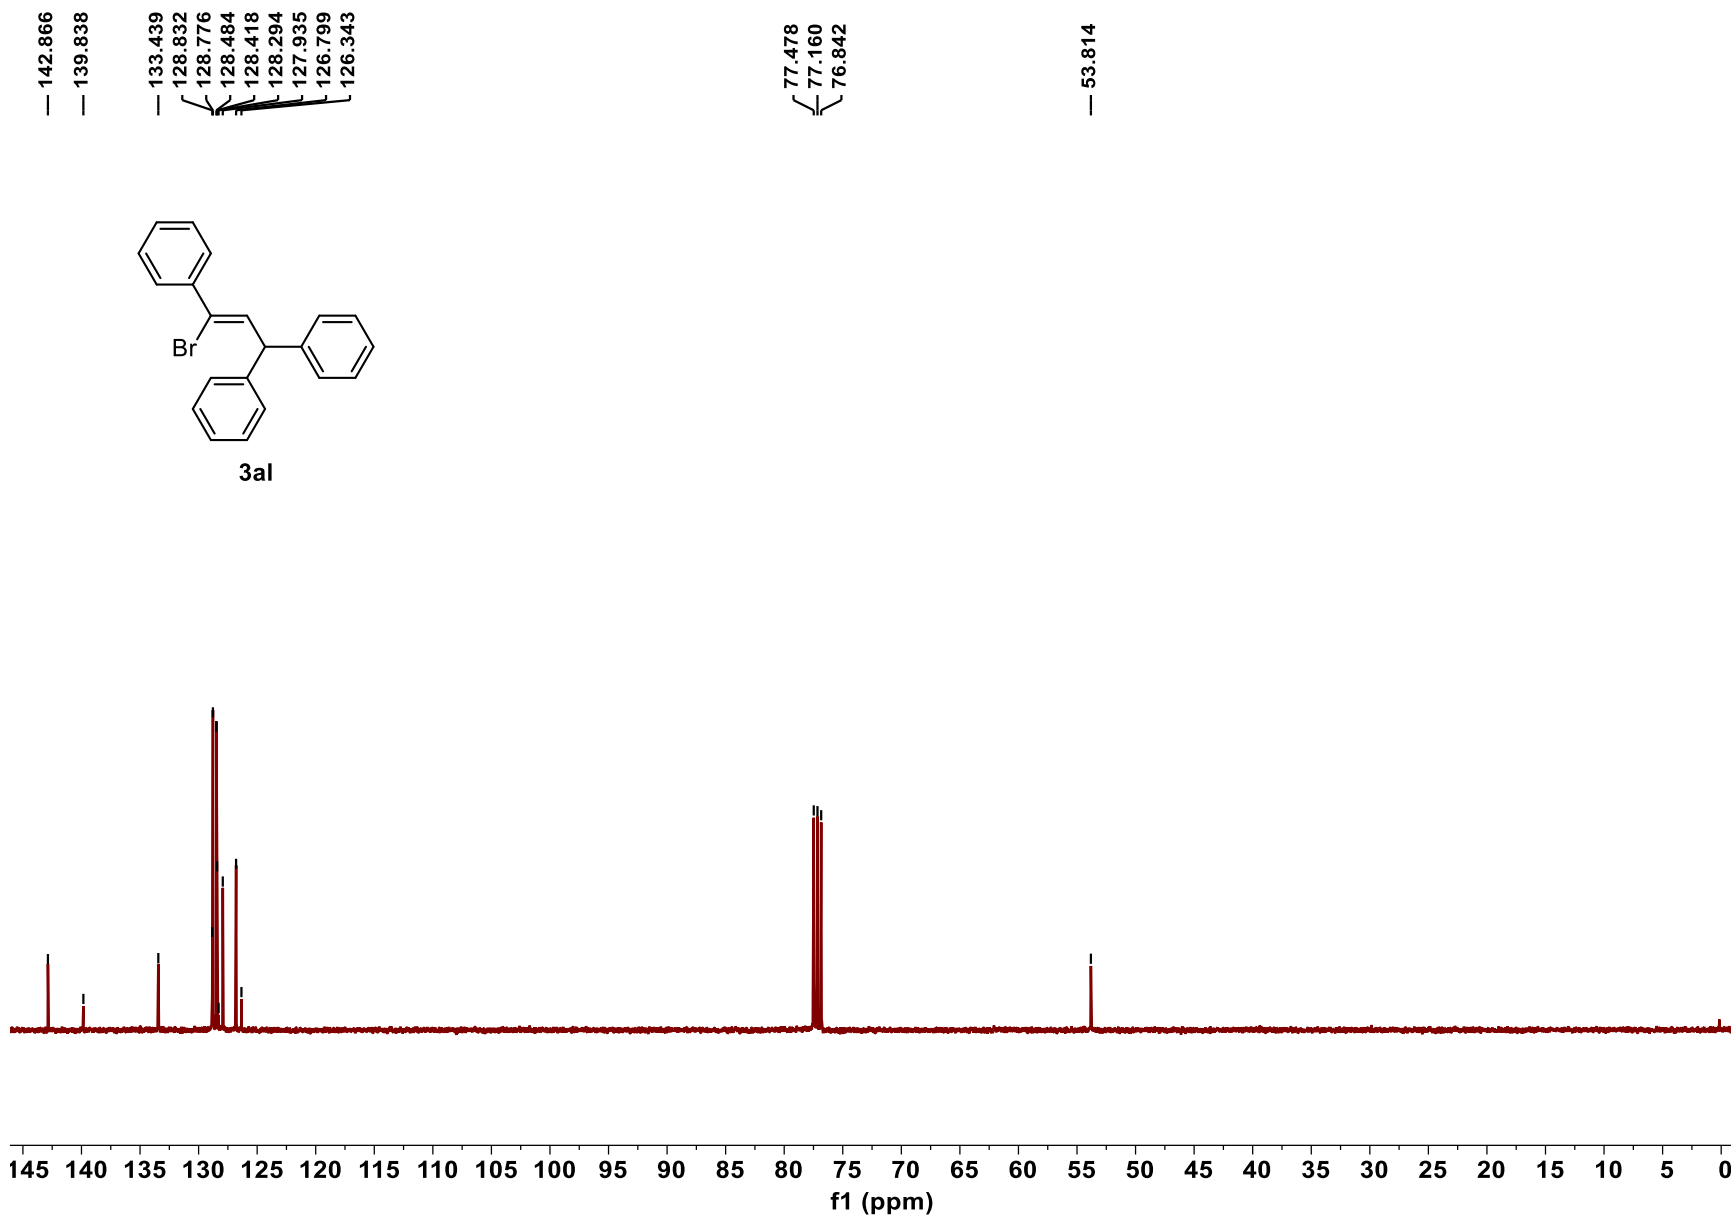



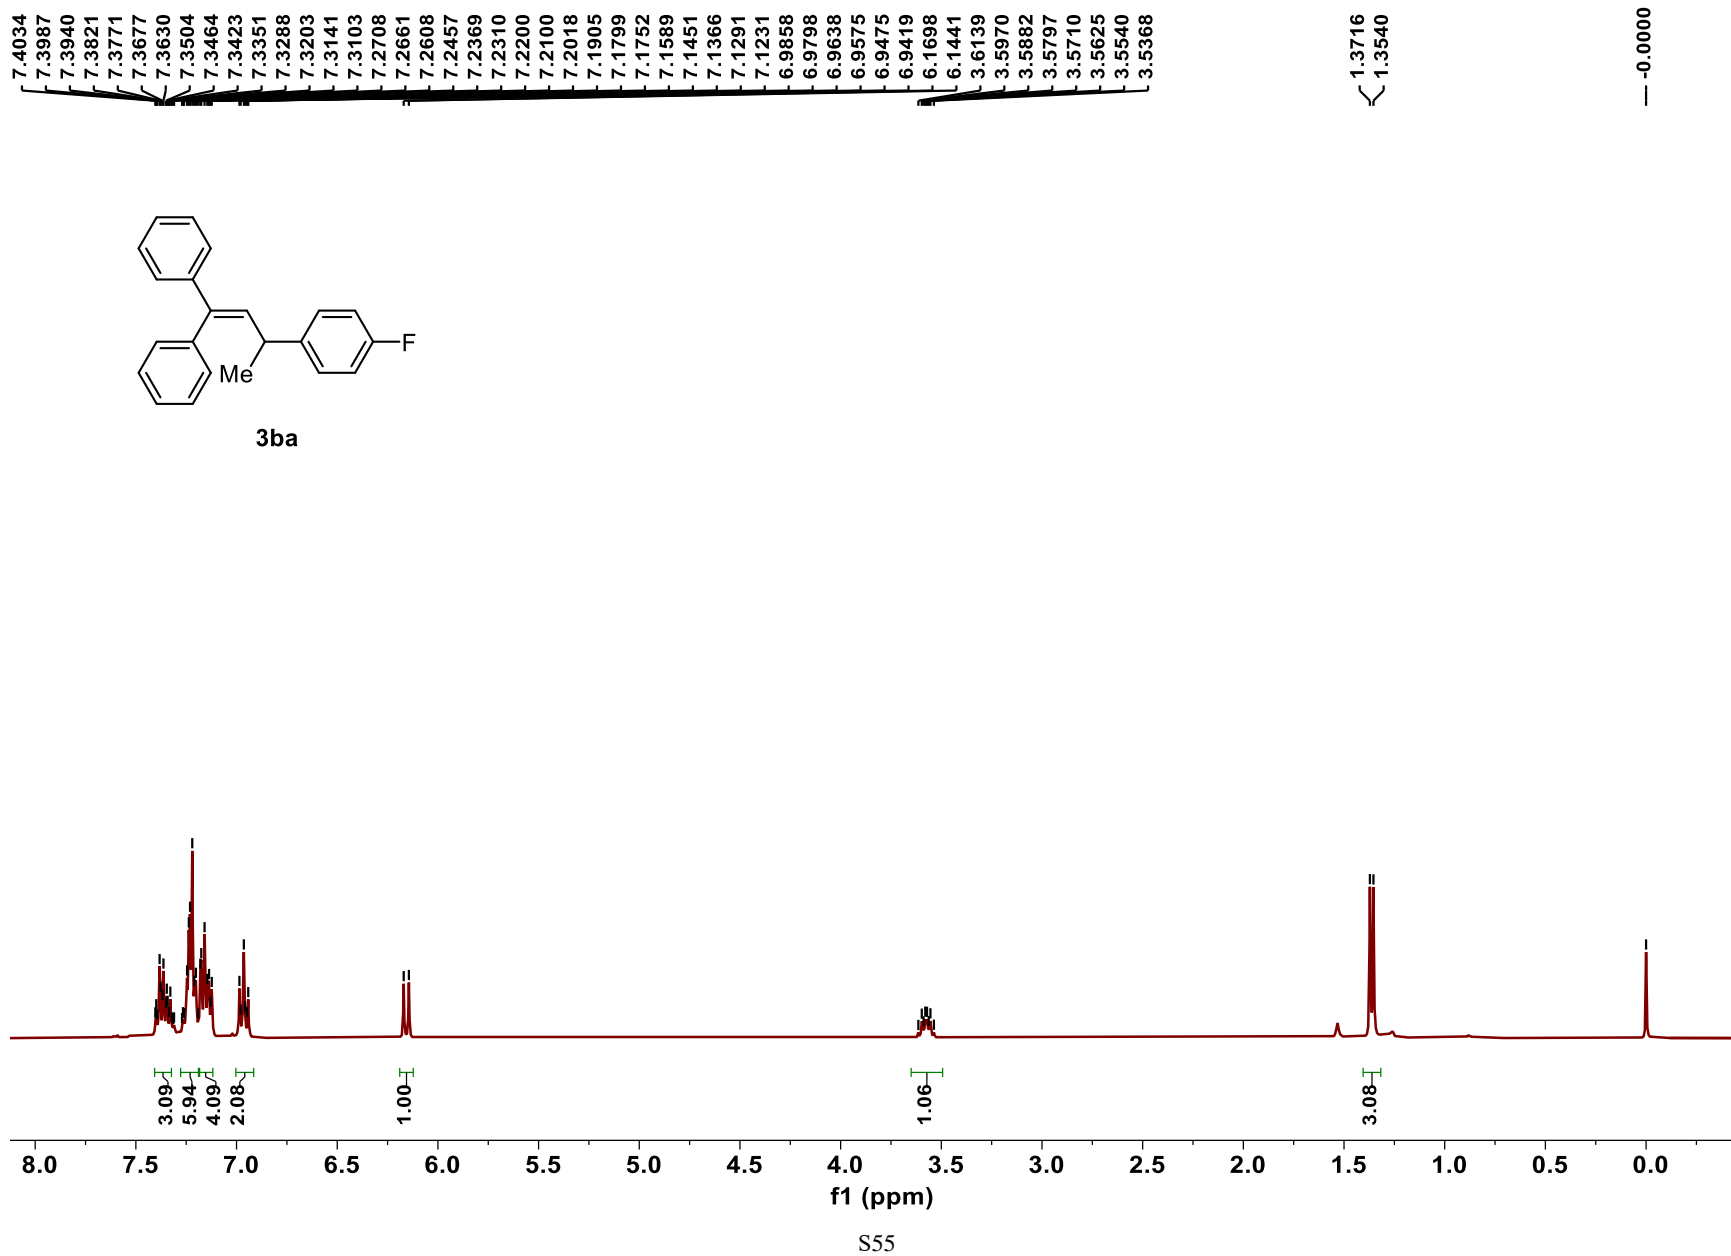



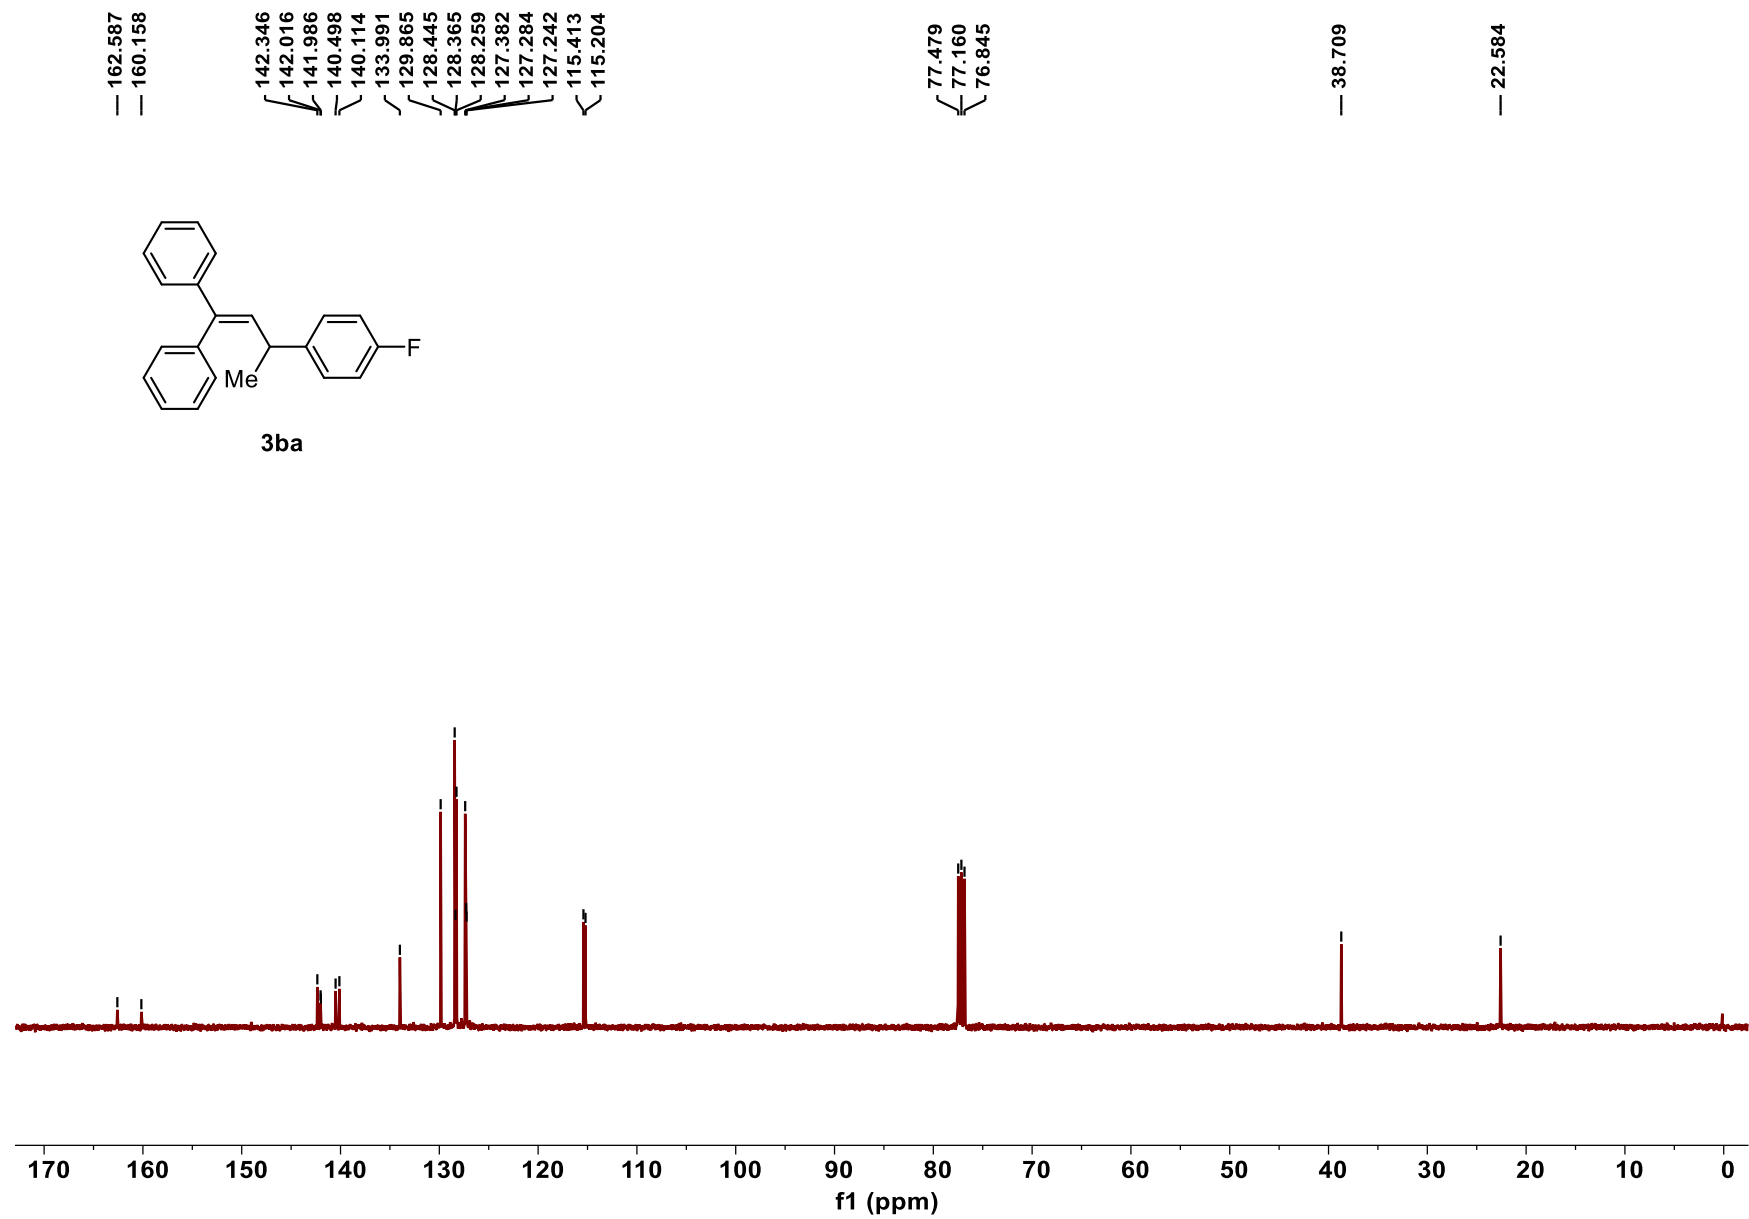



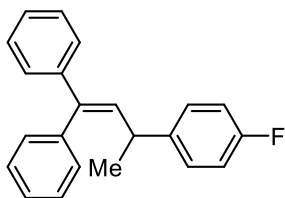

**3ba**

— -117.4574

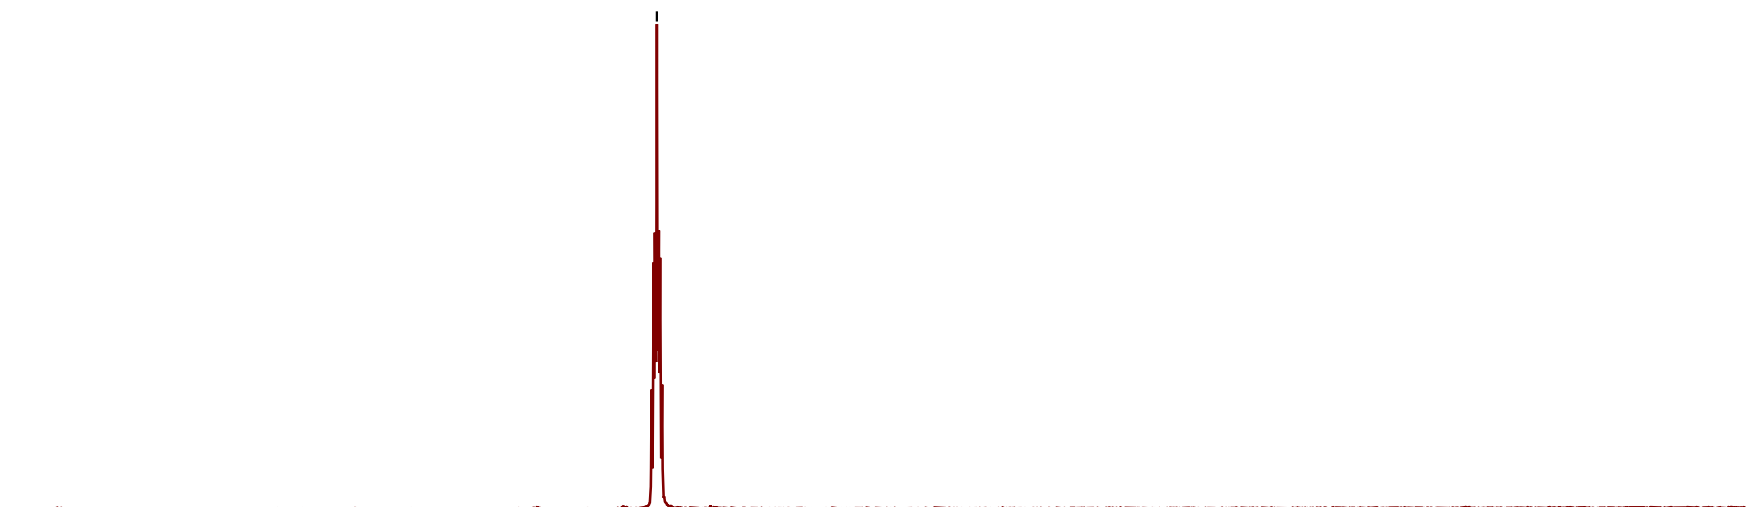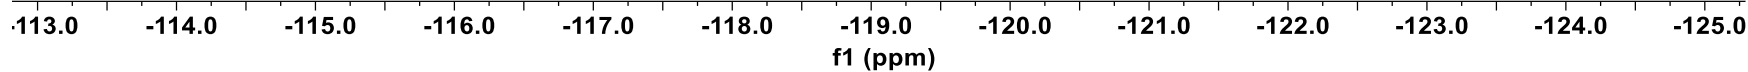



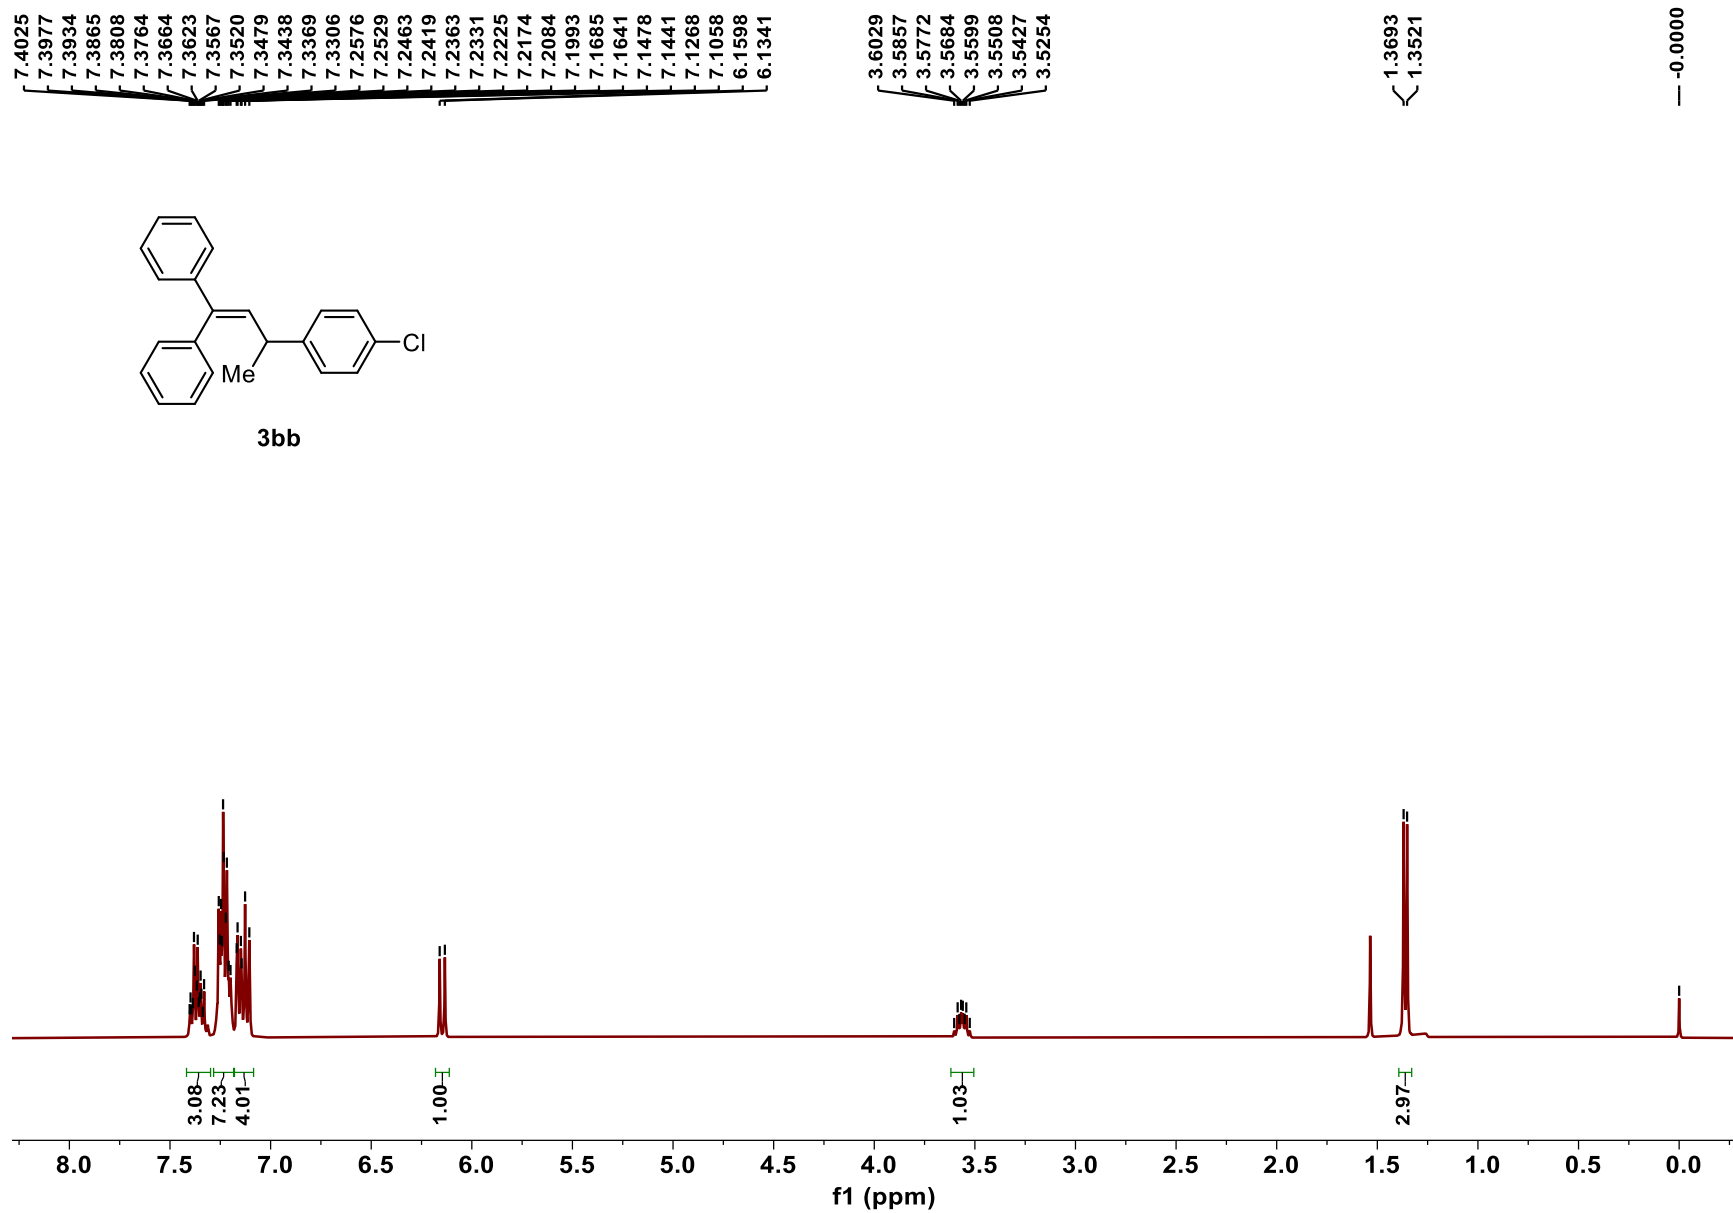



144.863  
142.278  
140.805  
140.054  
133.566  
131.774  
129.838  
128.703  
128.460  
128.438  
128.271  
127.390  
127.325  
127.291

77.479  
77.160  
76.845

38.895

22.466

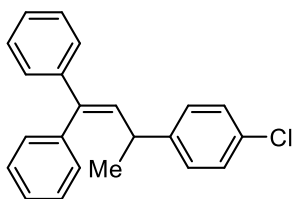

3bb

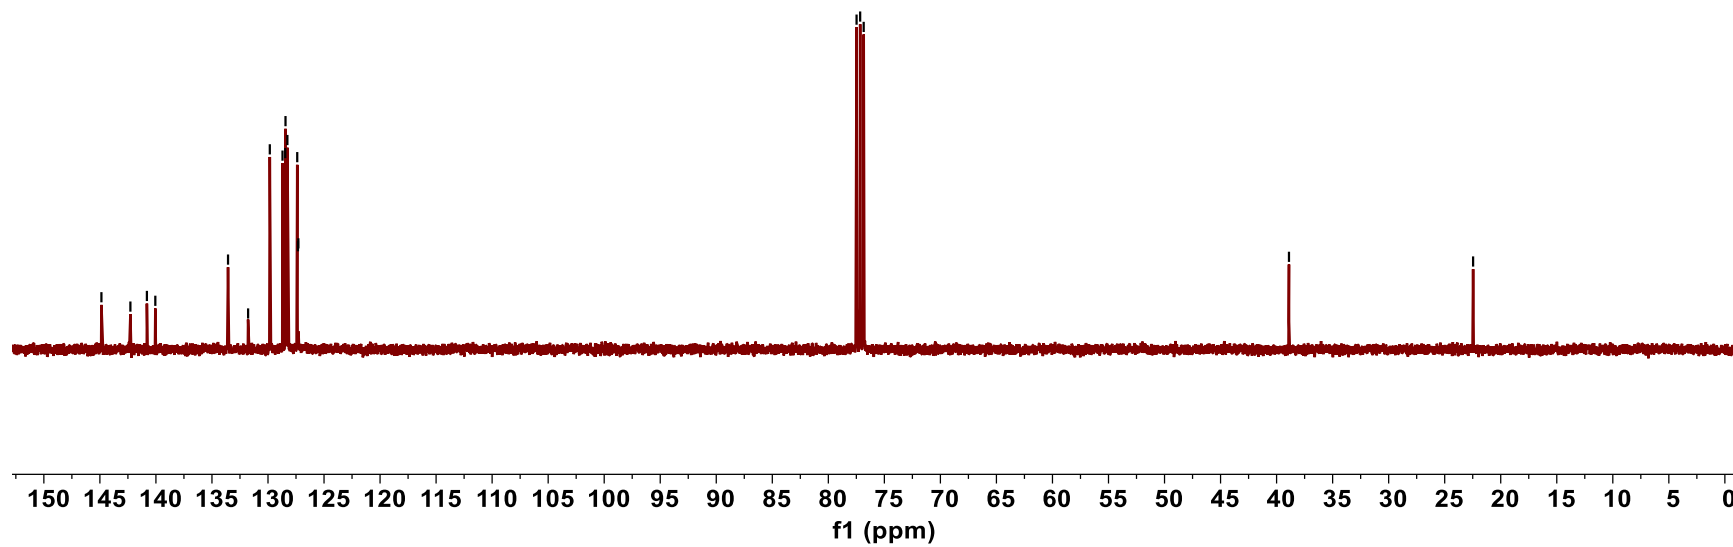



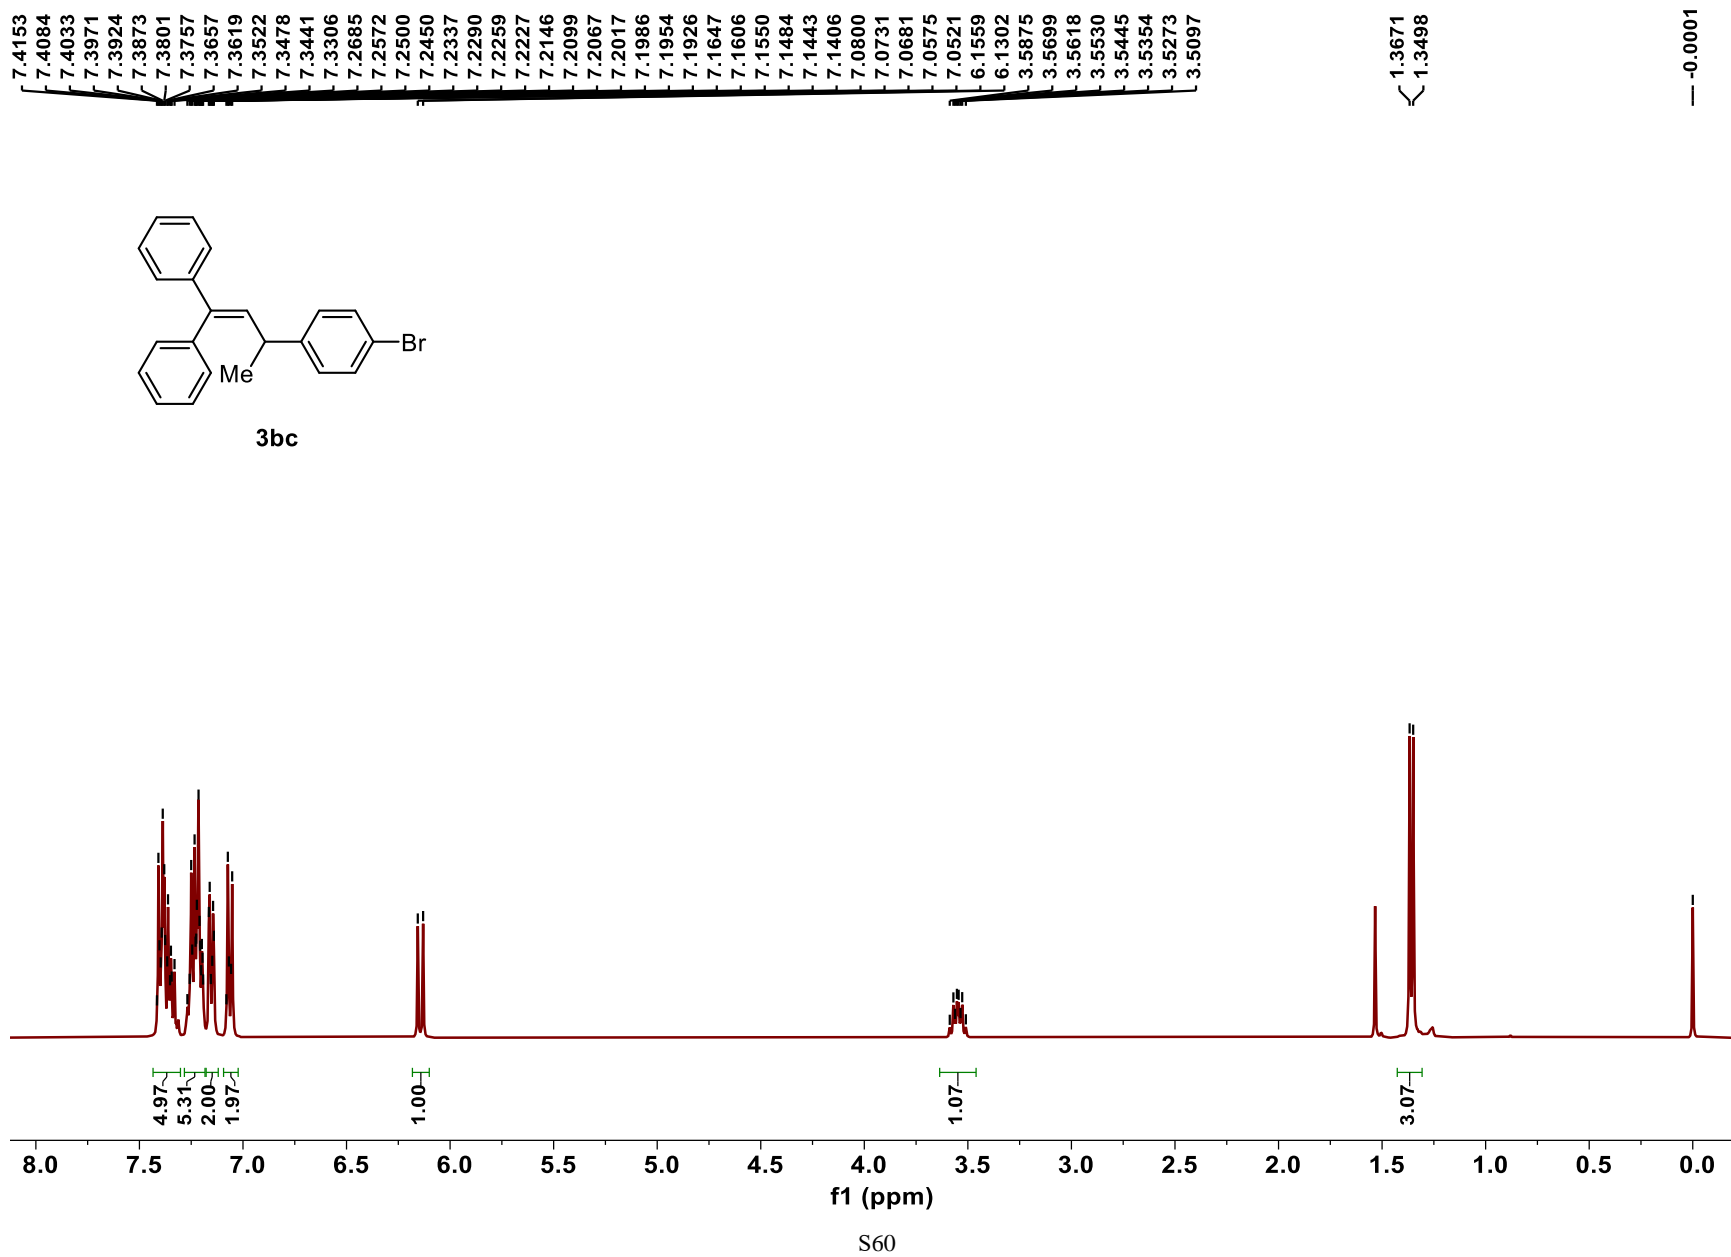



145.402  
142.263  
140.866  
140.039  
133.456  
131.653  
129.831  
128.859  
128.464  
128.271  
127.390  
127.329  
127.299  
— 119.836

77.479  
77.160  
76.841

— 38.967

— 22.424

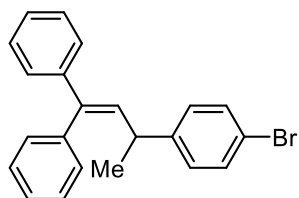

**3bc**

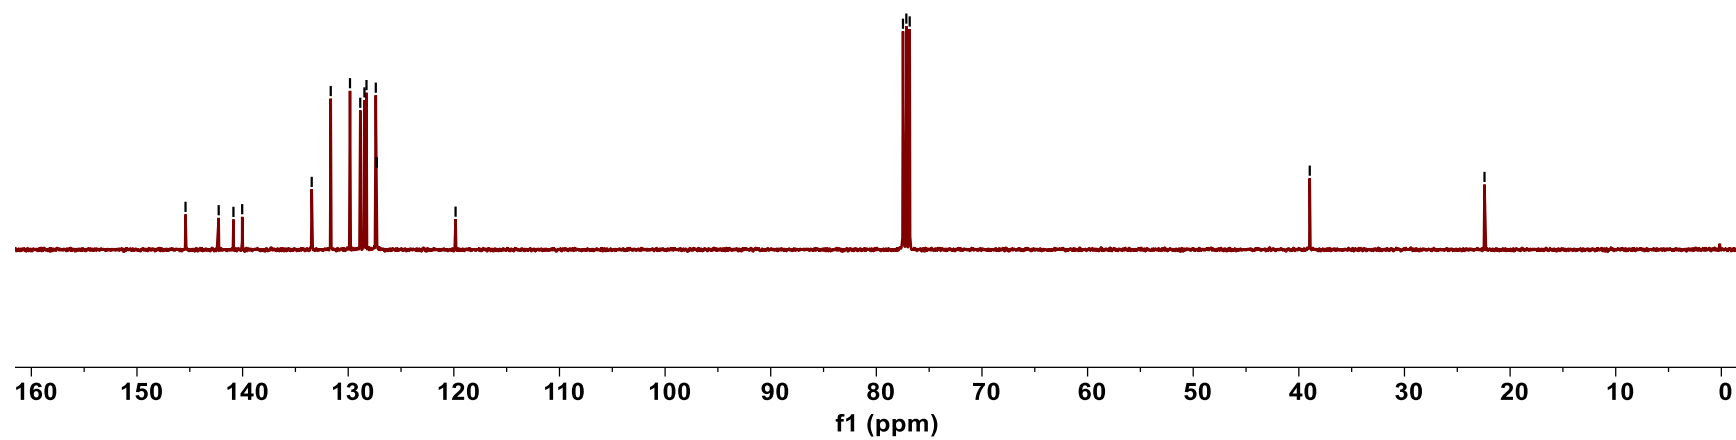



7.3918  
7.3802  
7.3749  
7.3705  
7.3601  
7.3564  
7.3504  
7.3398  
7.3357  
7.3316  
7.3178  
7.2391  
7.2331  
7.2231  
7.2171  
7.2071  
7.2030  
7.1983  
7.1943  
7.1880  
7.1817  
7.1776  
7.1742  
7.0999  
6.2087  
6.1827

3.6004  
3.5832  
3.5744  
3.5659  
3.5571  
3.5487  
3.5399  
3.5226

2.3126

1.3703  
1.3530

-0.0000

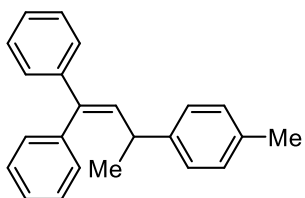

**3bd**

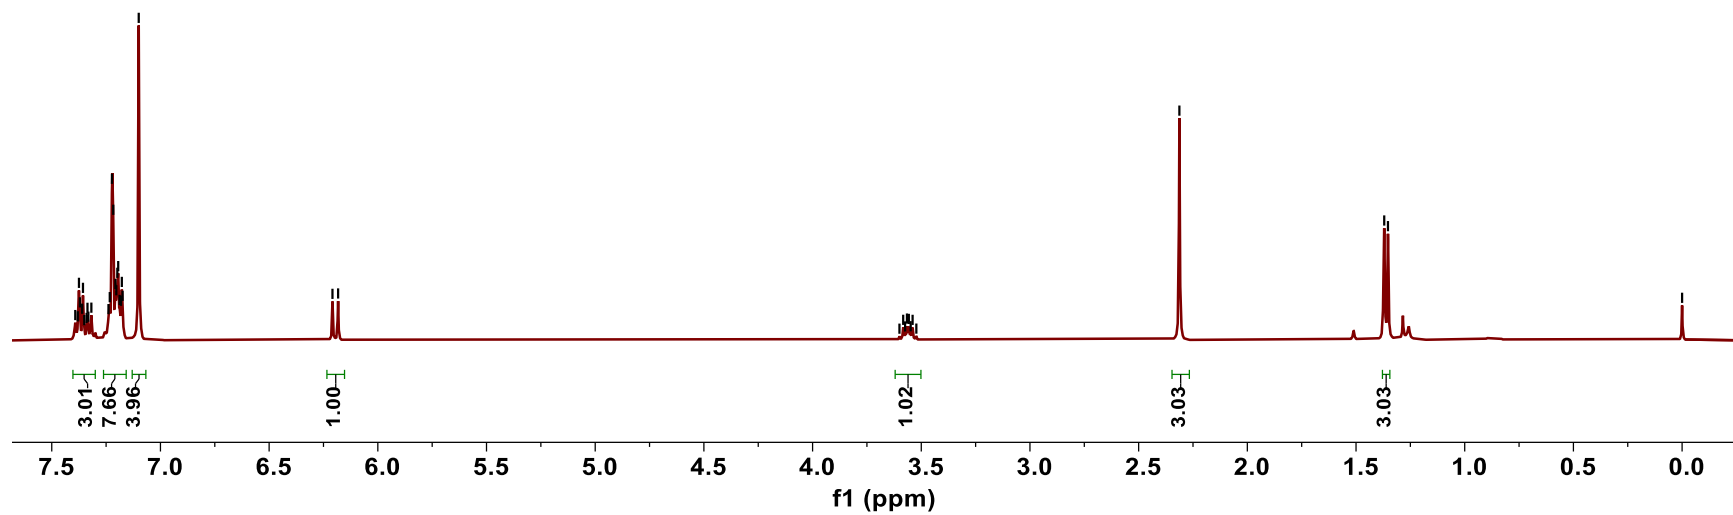



143.315  
142.563  
140.259  
140.031  
135.612  
134.511  
129.971  
129.315  
128.373  
128.195  
127.405  
127.162  
127.079  
126.934

77.479  
77.160  
76.845

39.013

22.580  
21.145

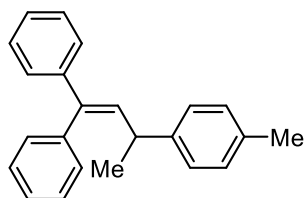

3bd

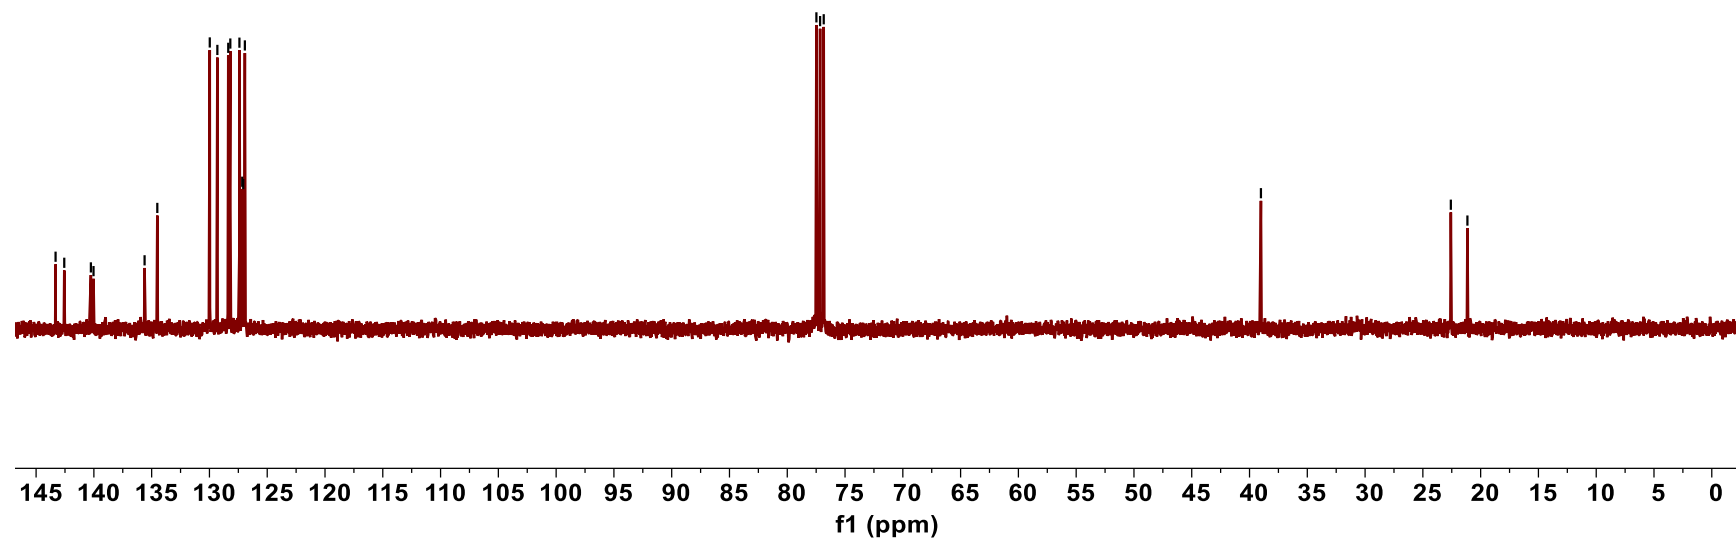



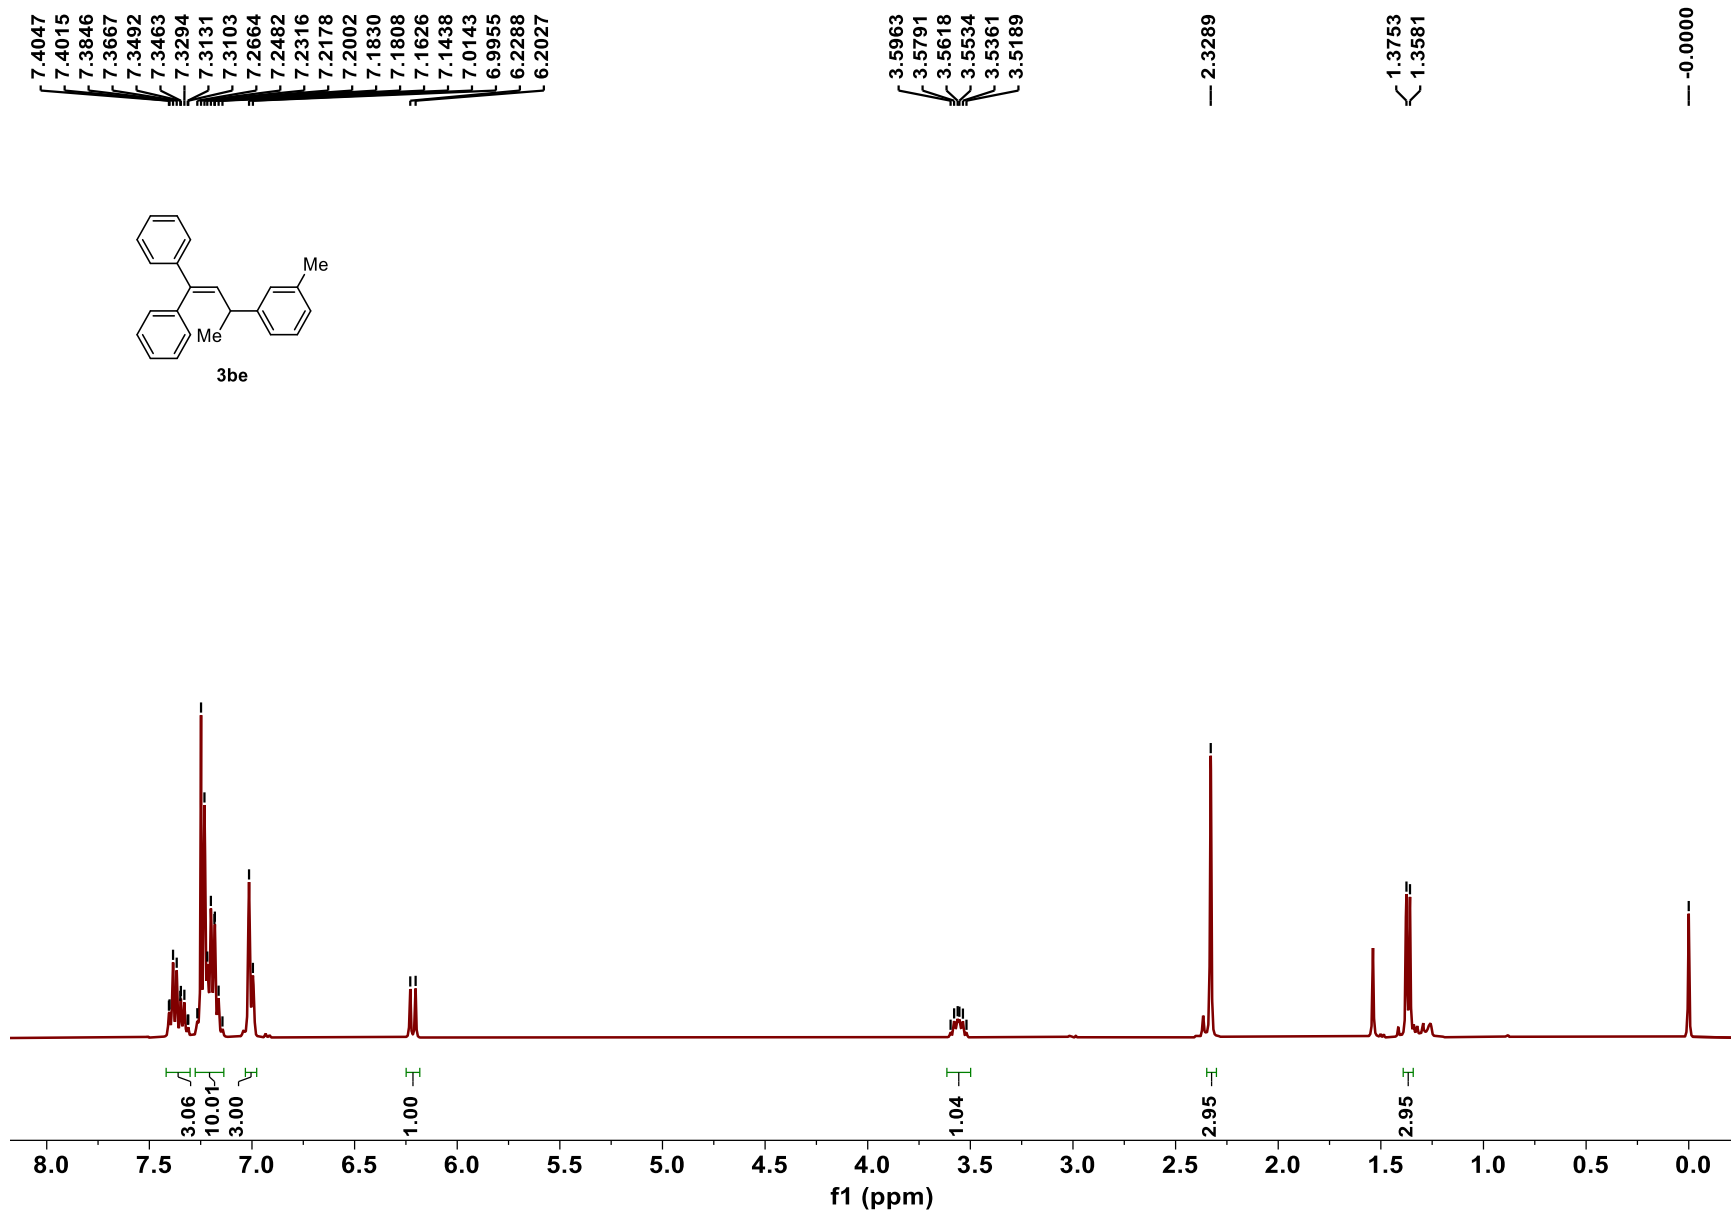



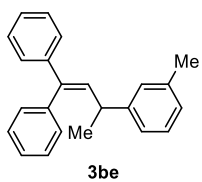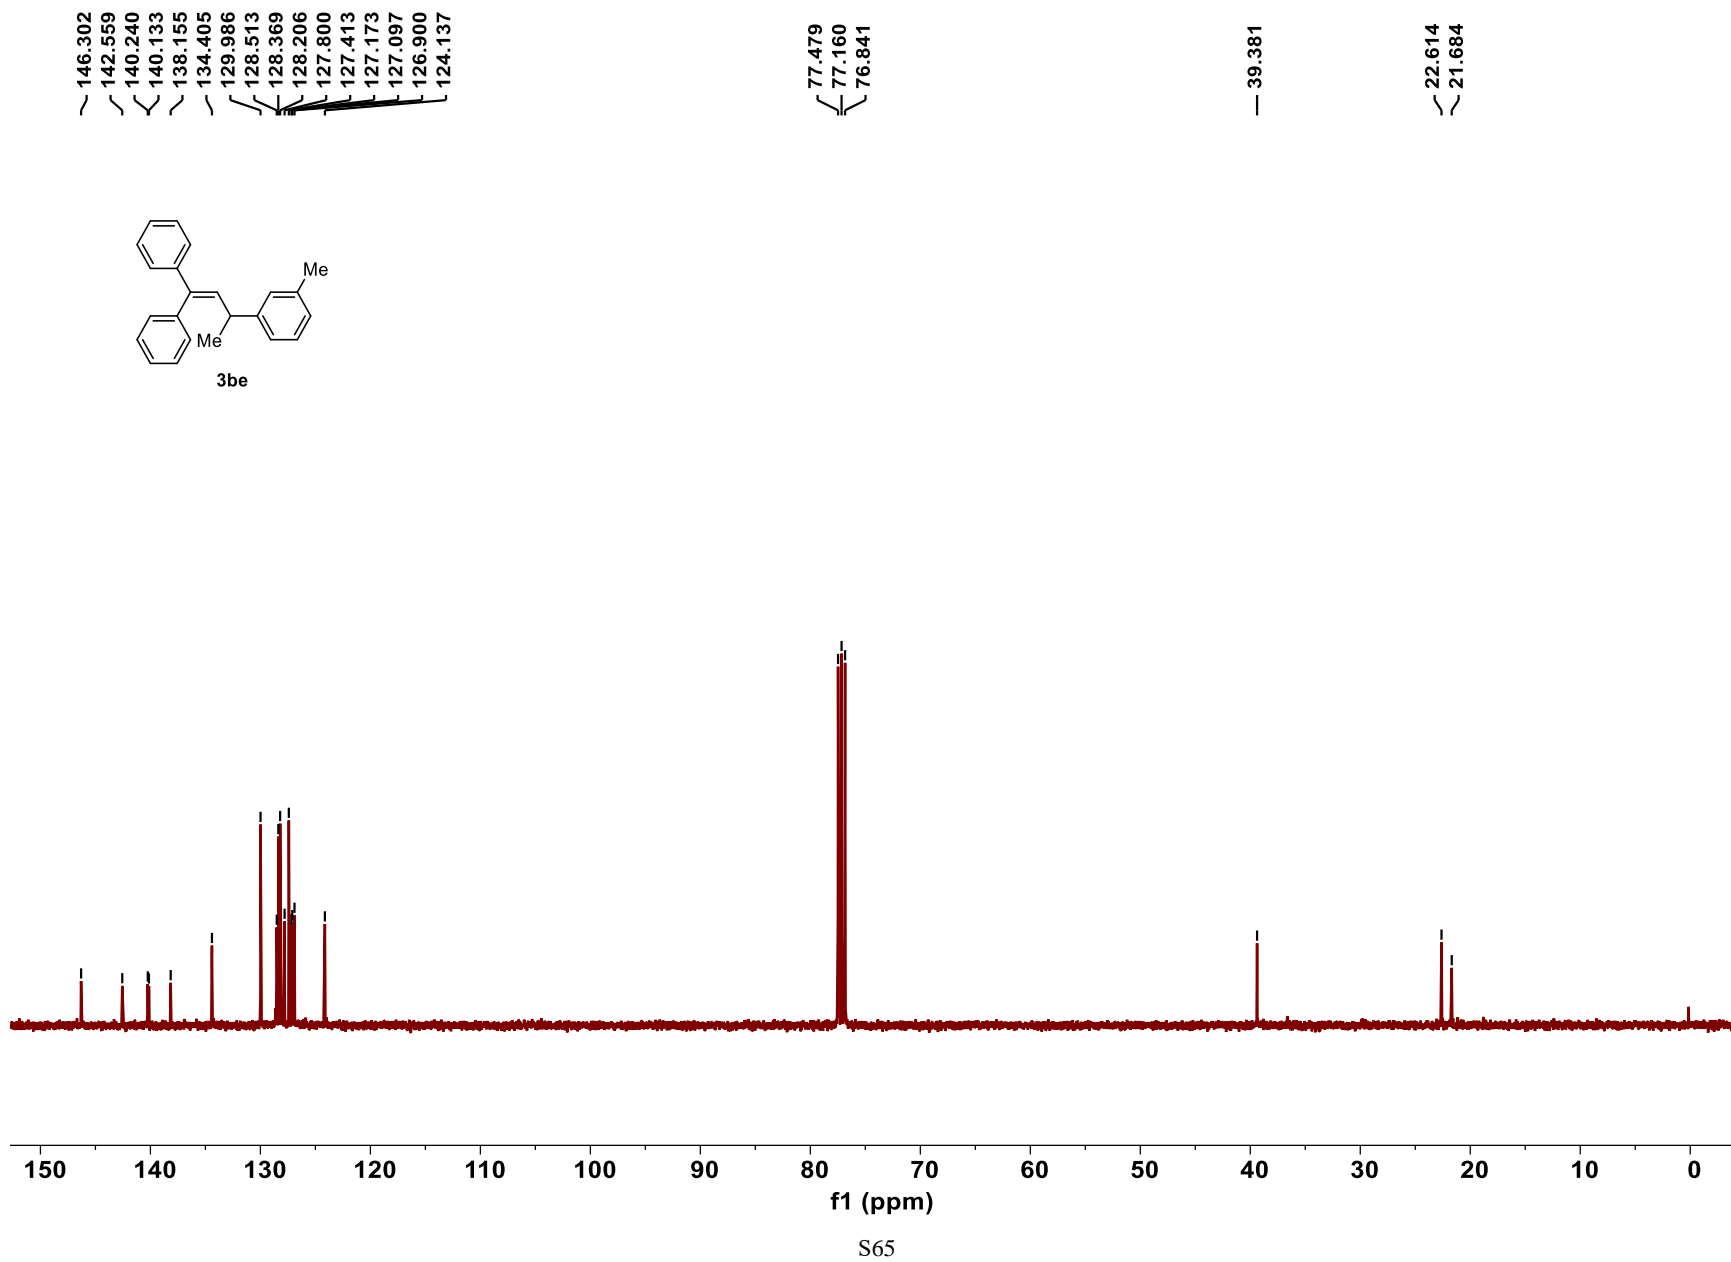



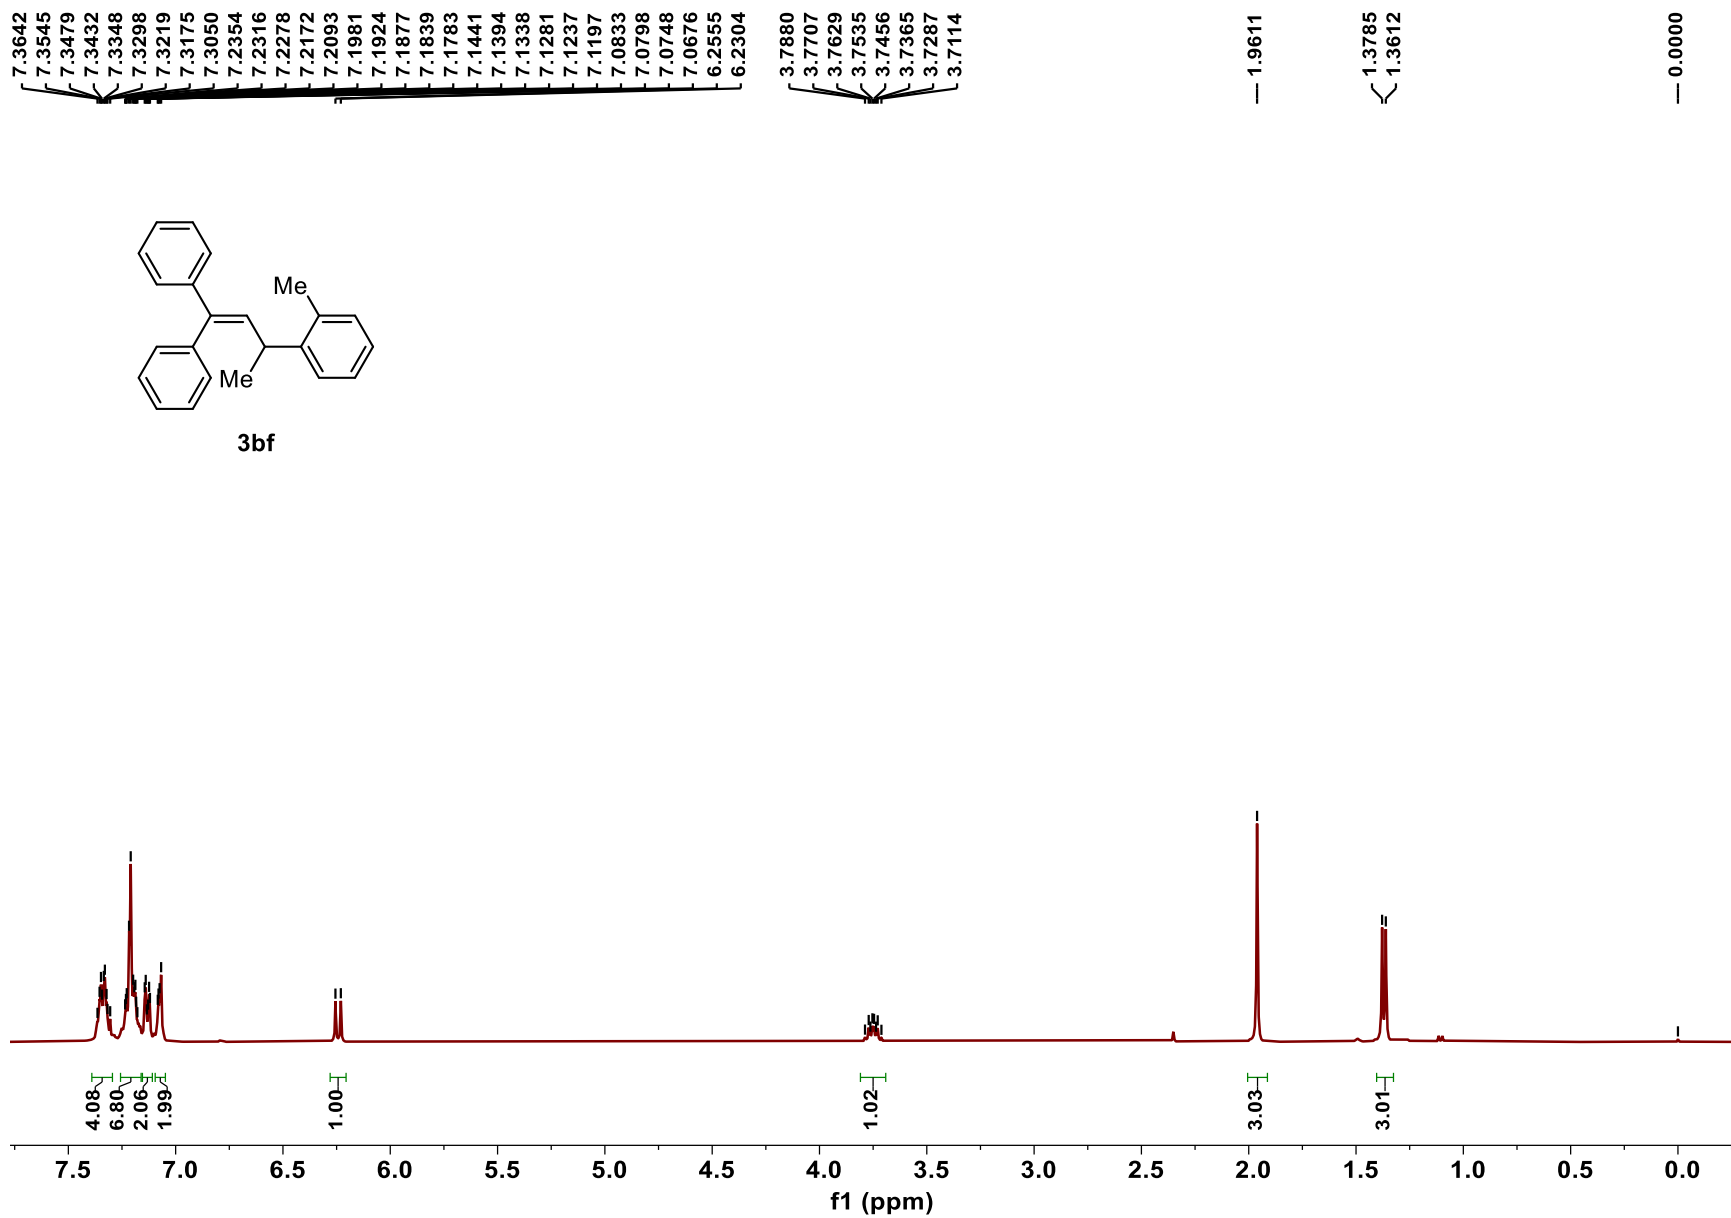



145.118  
142.601  
140.471  
140.293  
135.385  
134.276  
130.469  
129.873  
128.309  
128.199  
127.474  
127.212  
127.117  
126.399  
126.080  
125.872

77.475  
77.160  
76.841

35.483

22.834  
19.349

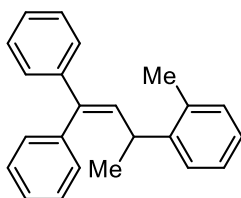

**3bf**

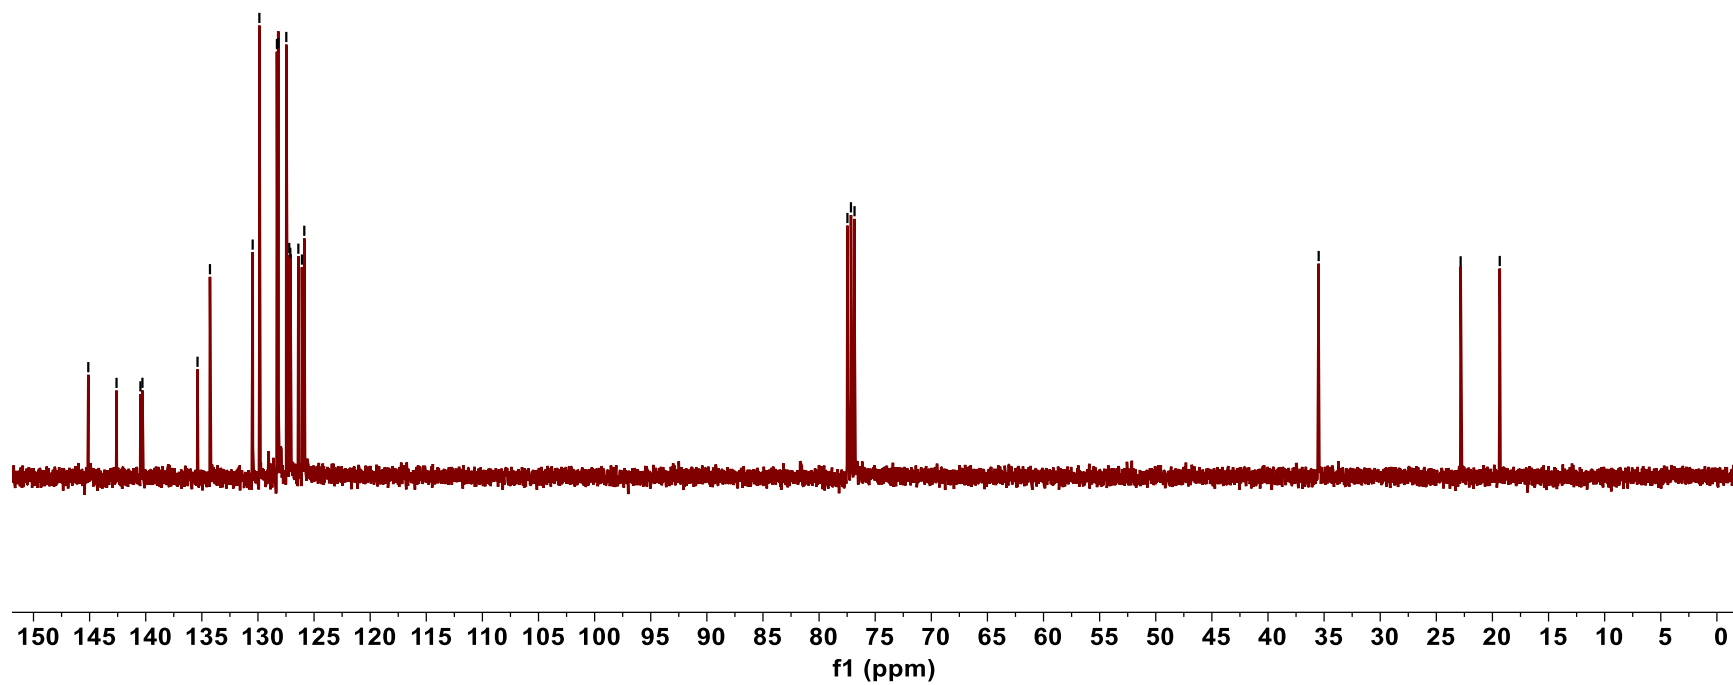



7.3830  
7.3789  
7.3636  
7.3601  
7.3548  
7.3504  
7.3391  
7.3354  
7.3206  
7.3156  
7.3115  
7.3065  
7.3034  
7.3002  
7.2868  
7.2839  
7.2770  
7.2736  
7.2563  
7.2491  
7.2381  
7.2350  
7.2309  
7.2240  
7.2187  
7.2099  
7.1996  
7.1964  
7.1275  
7.1196  
7.1152  
7.1090  
7.1039  
7.0999  
7.0961  
7.0895  
7.0854  
6.2692  
6.2444  
4.0911  
4.0739  
4.0664  
4.0566  
4.0491  
4.0394  
4.0319  
4.0149

1.3668  
1.3496

-0.0000

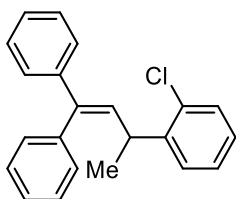

**3bg**

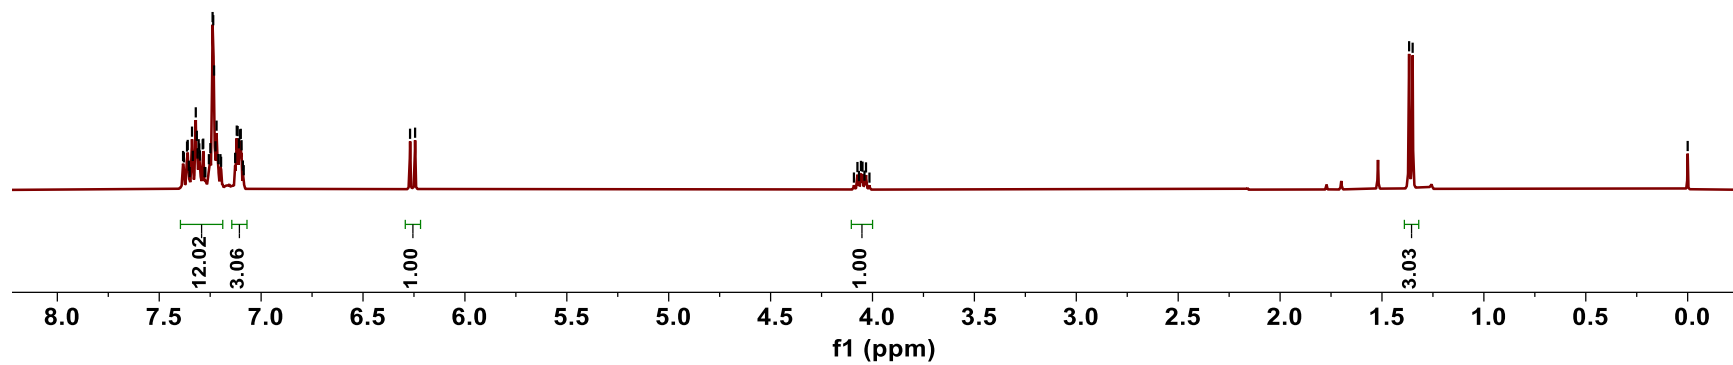



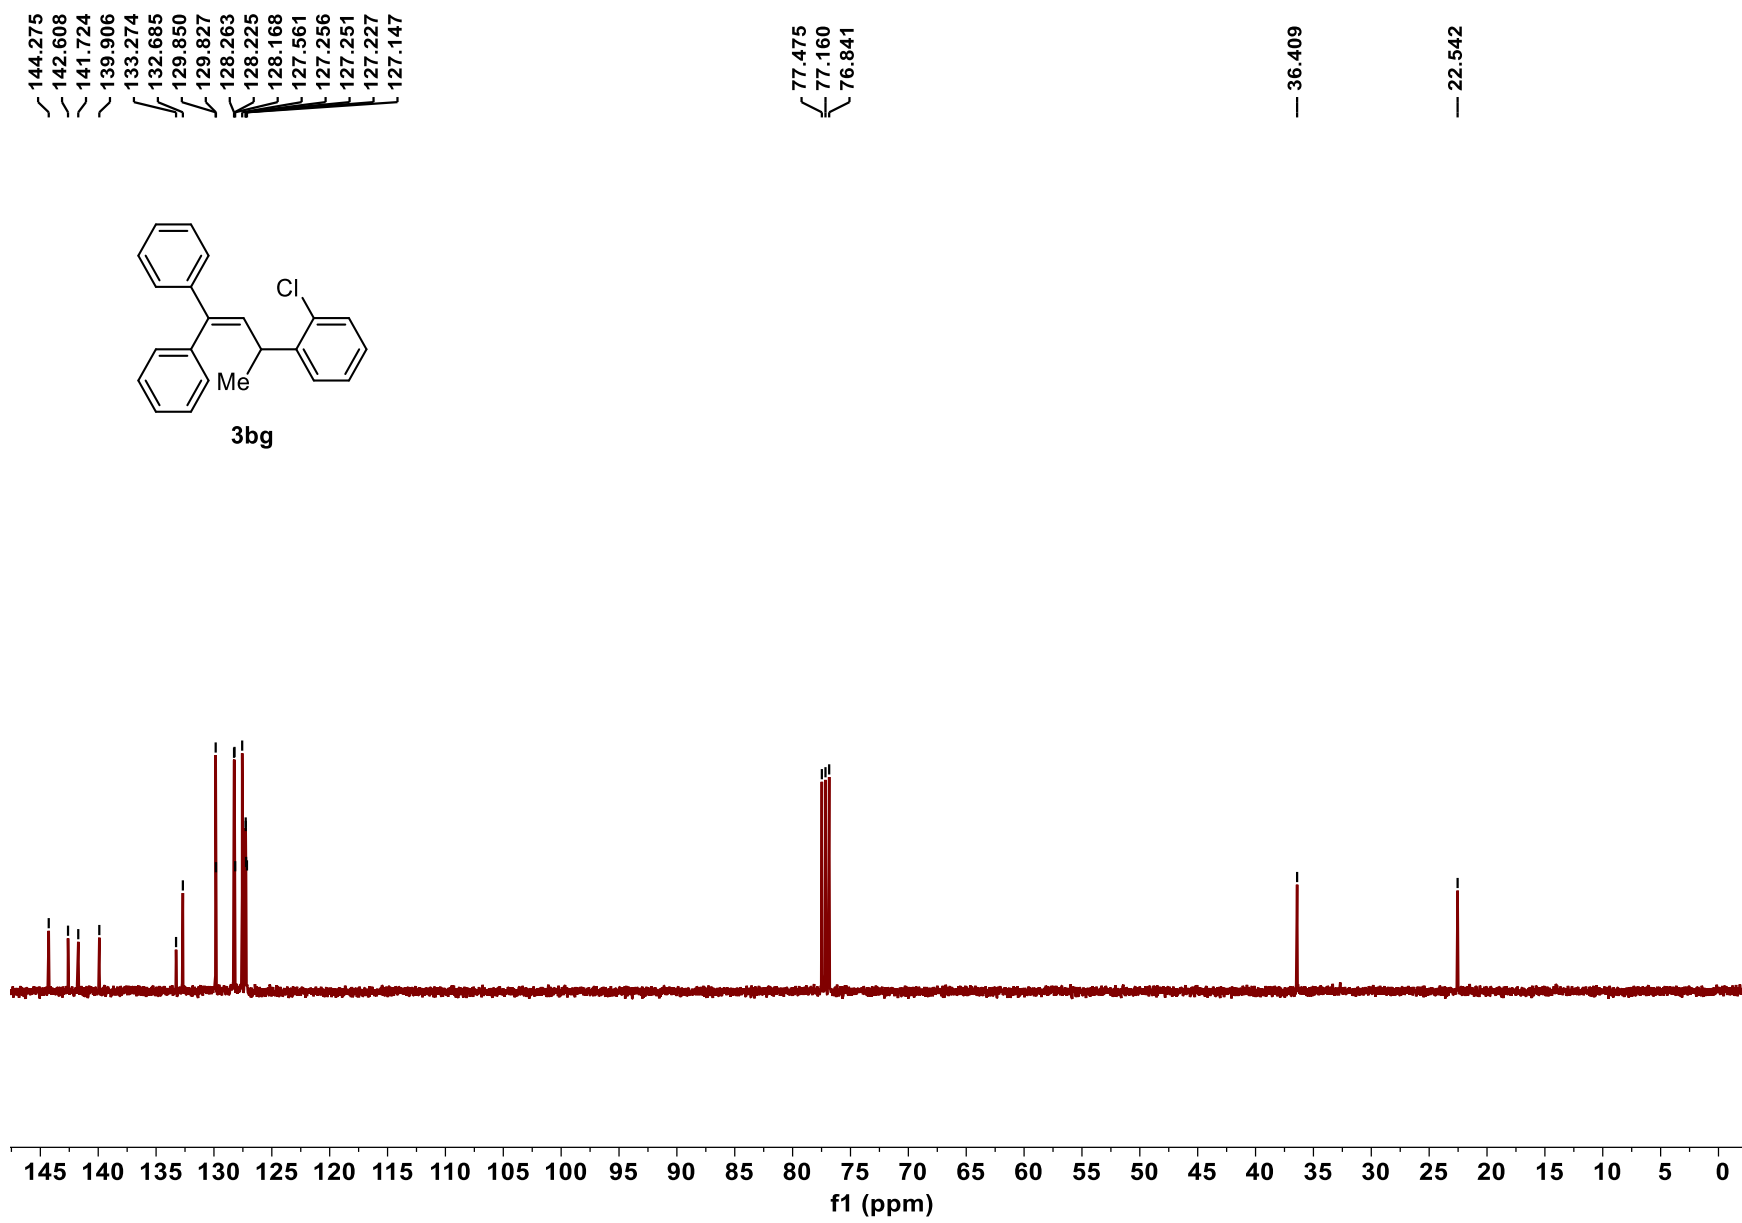



7.4523  
7.4476  
7.4351  
7.4200  
7.4109  
7.3940  
7.3752  
7.3620  
7.3579  
7.3517  
7.3448  
7.2780  
7.2692  
7.2629  
7.2573  
7.2501  
7.2438  
7.2331  
7.2291  
7.2193  
7.2112  
7.1695  
7.1645  
7.1485  
6.1968  
6.1714

3.6860  
3.6688  
3.6606  
3.6515  
3.6431  
3.6343  
3.6258  
3.6086

1.4161  
1.3988

-0.0000

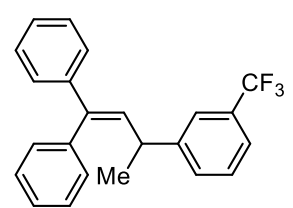

3bh

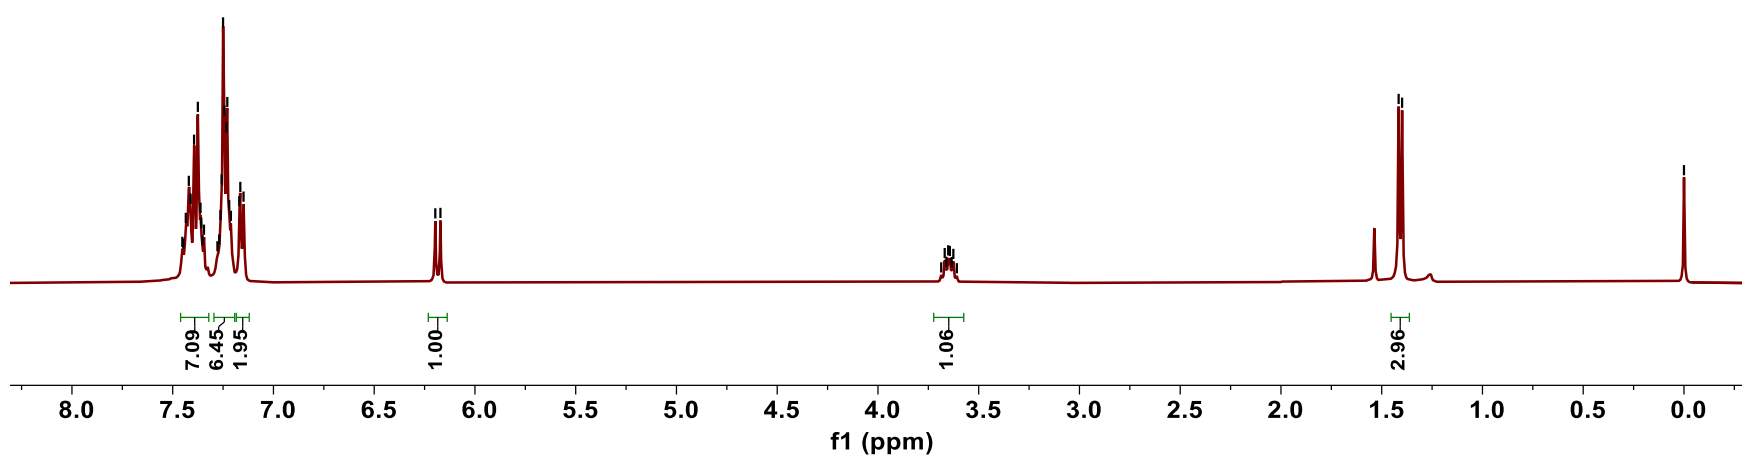



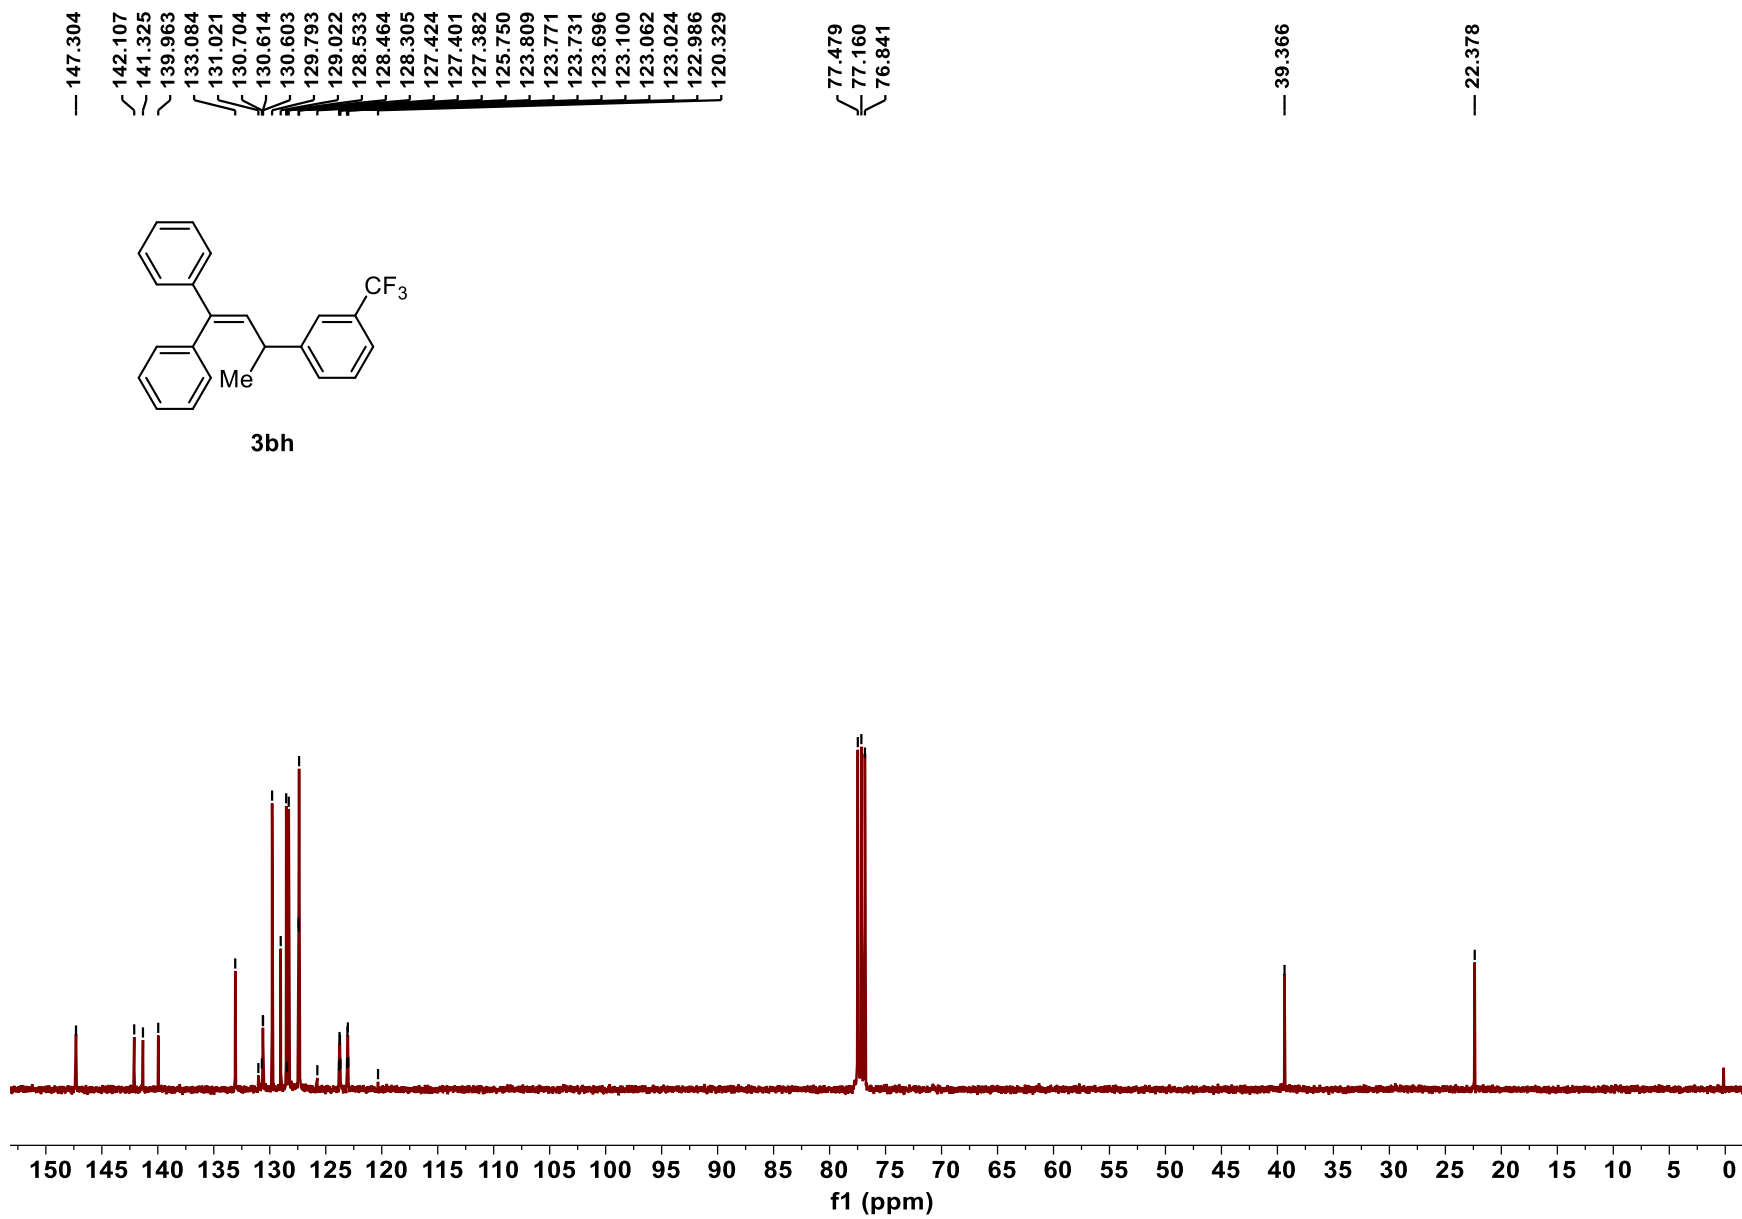



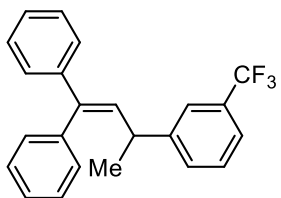

**3bh**

— -62.5184

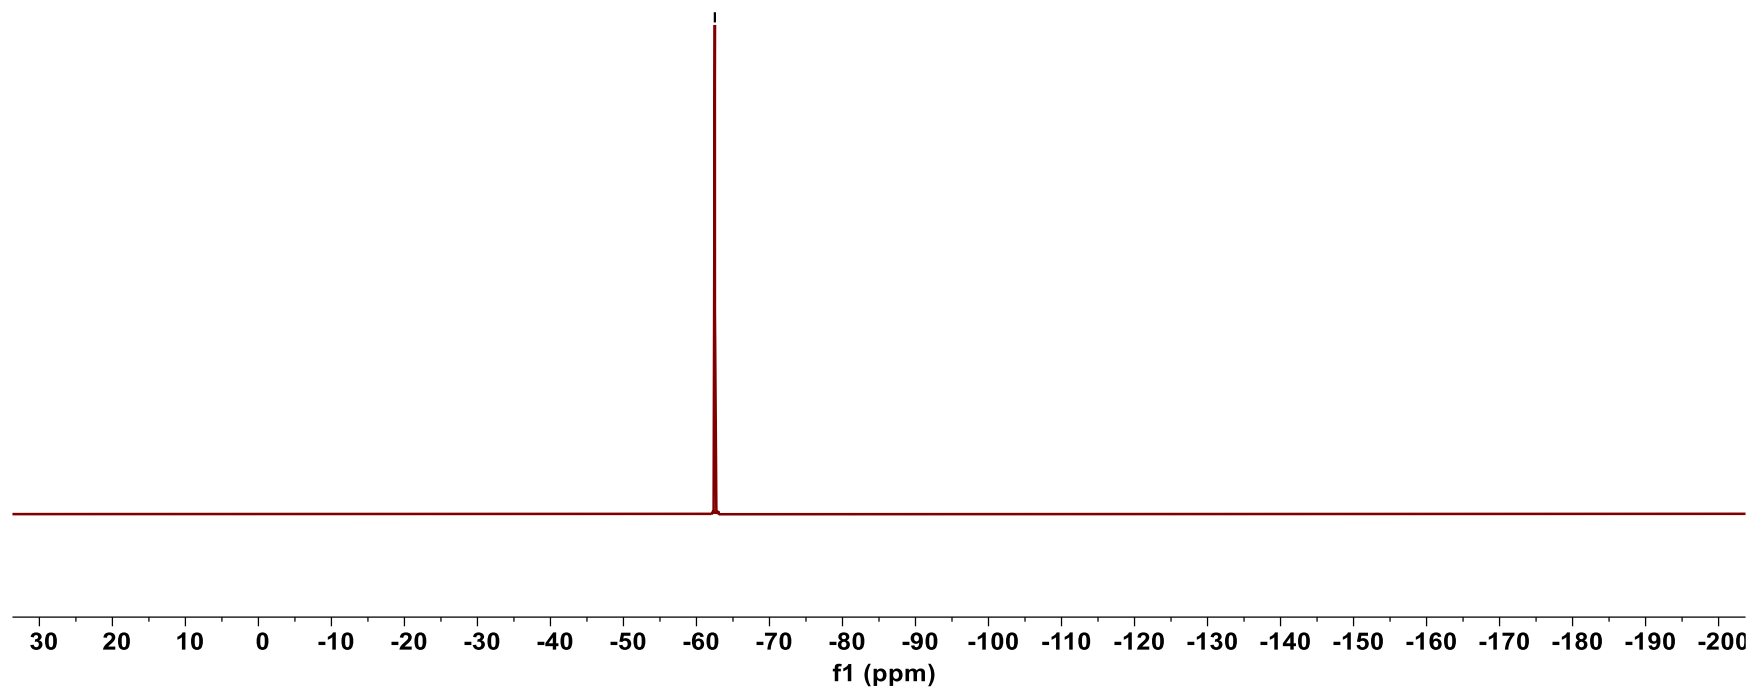



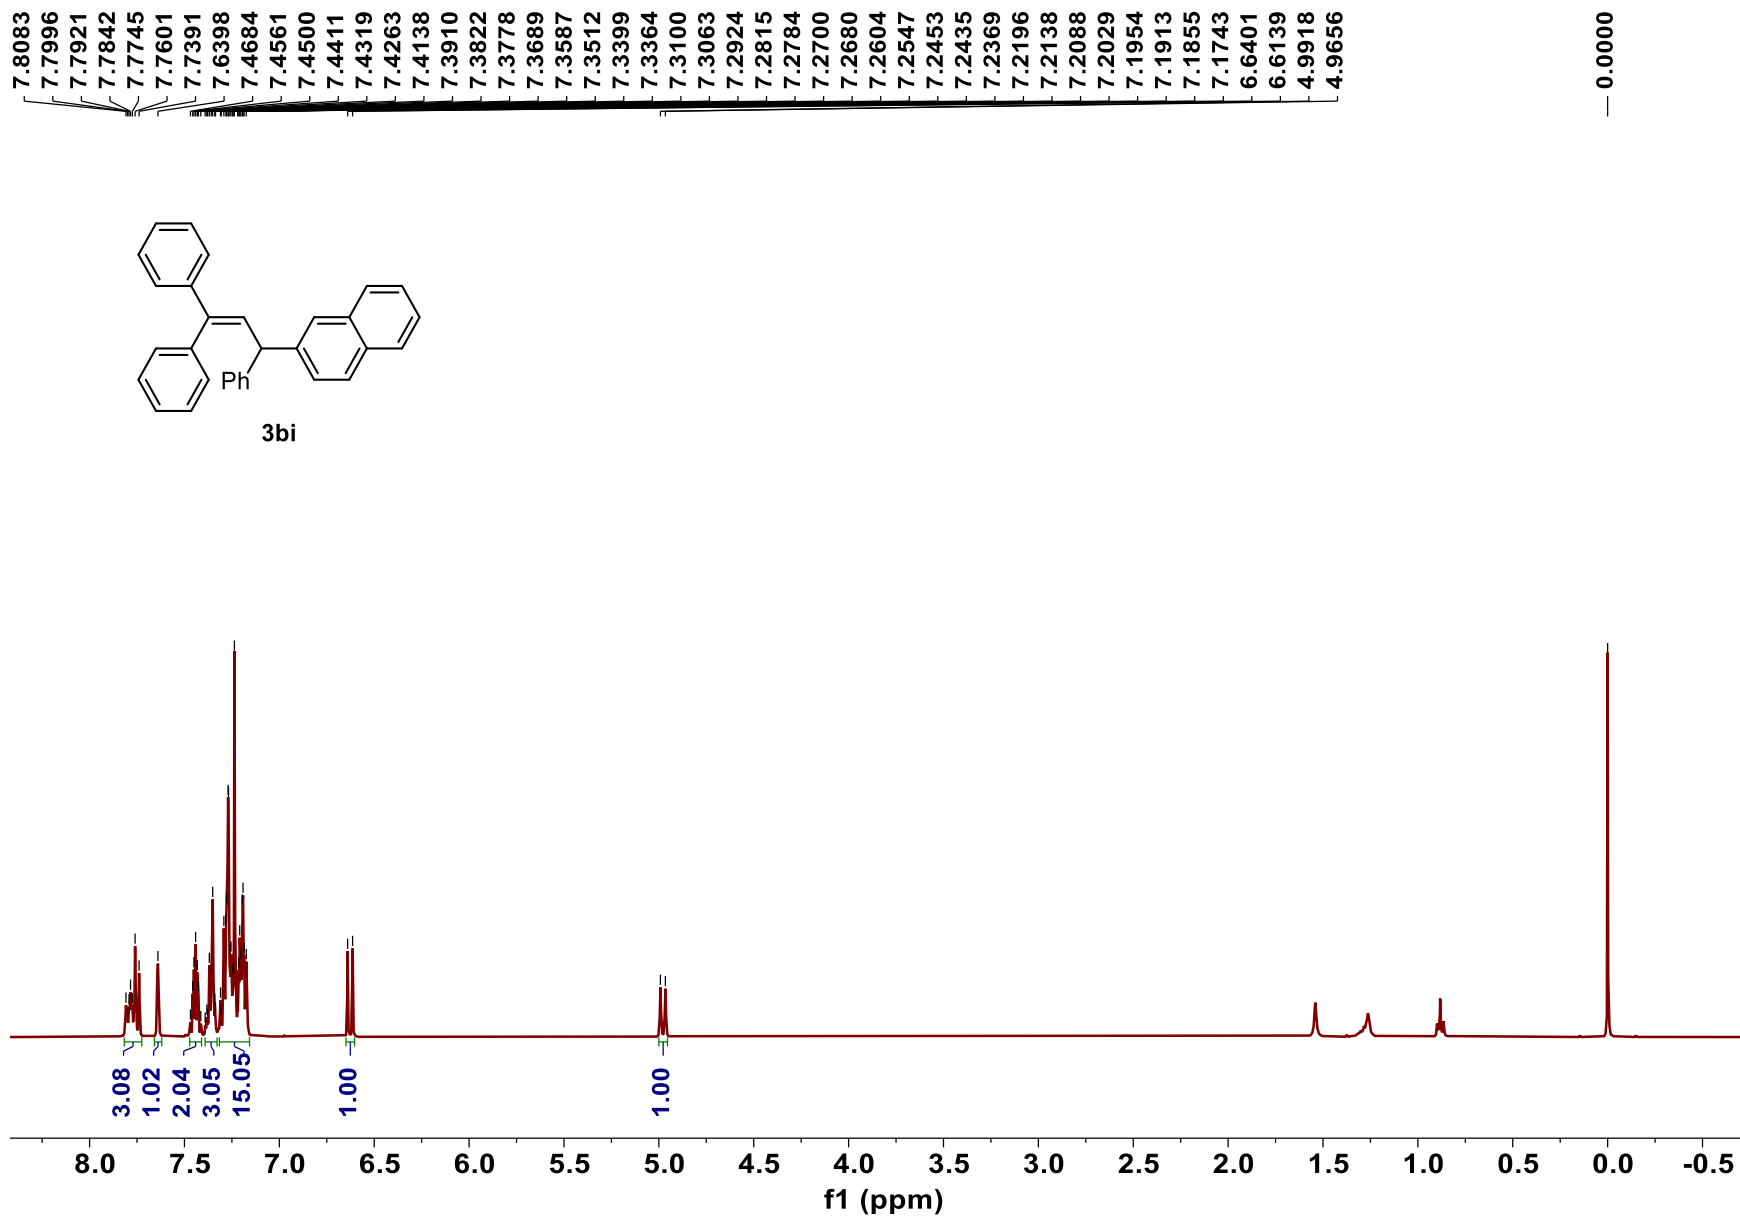



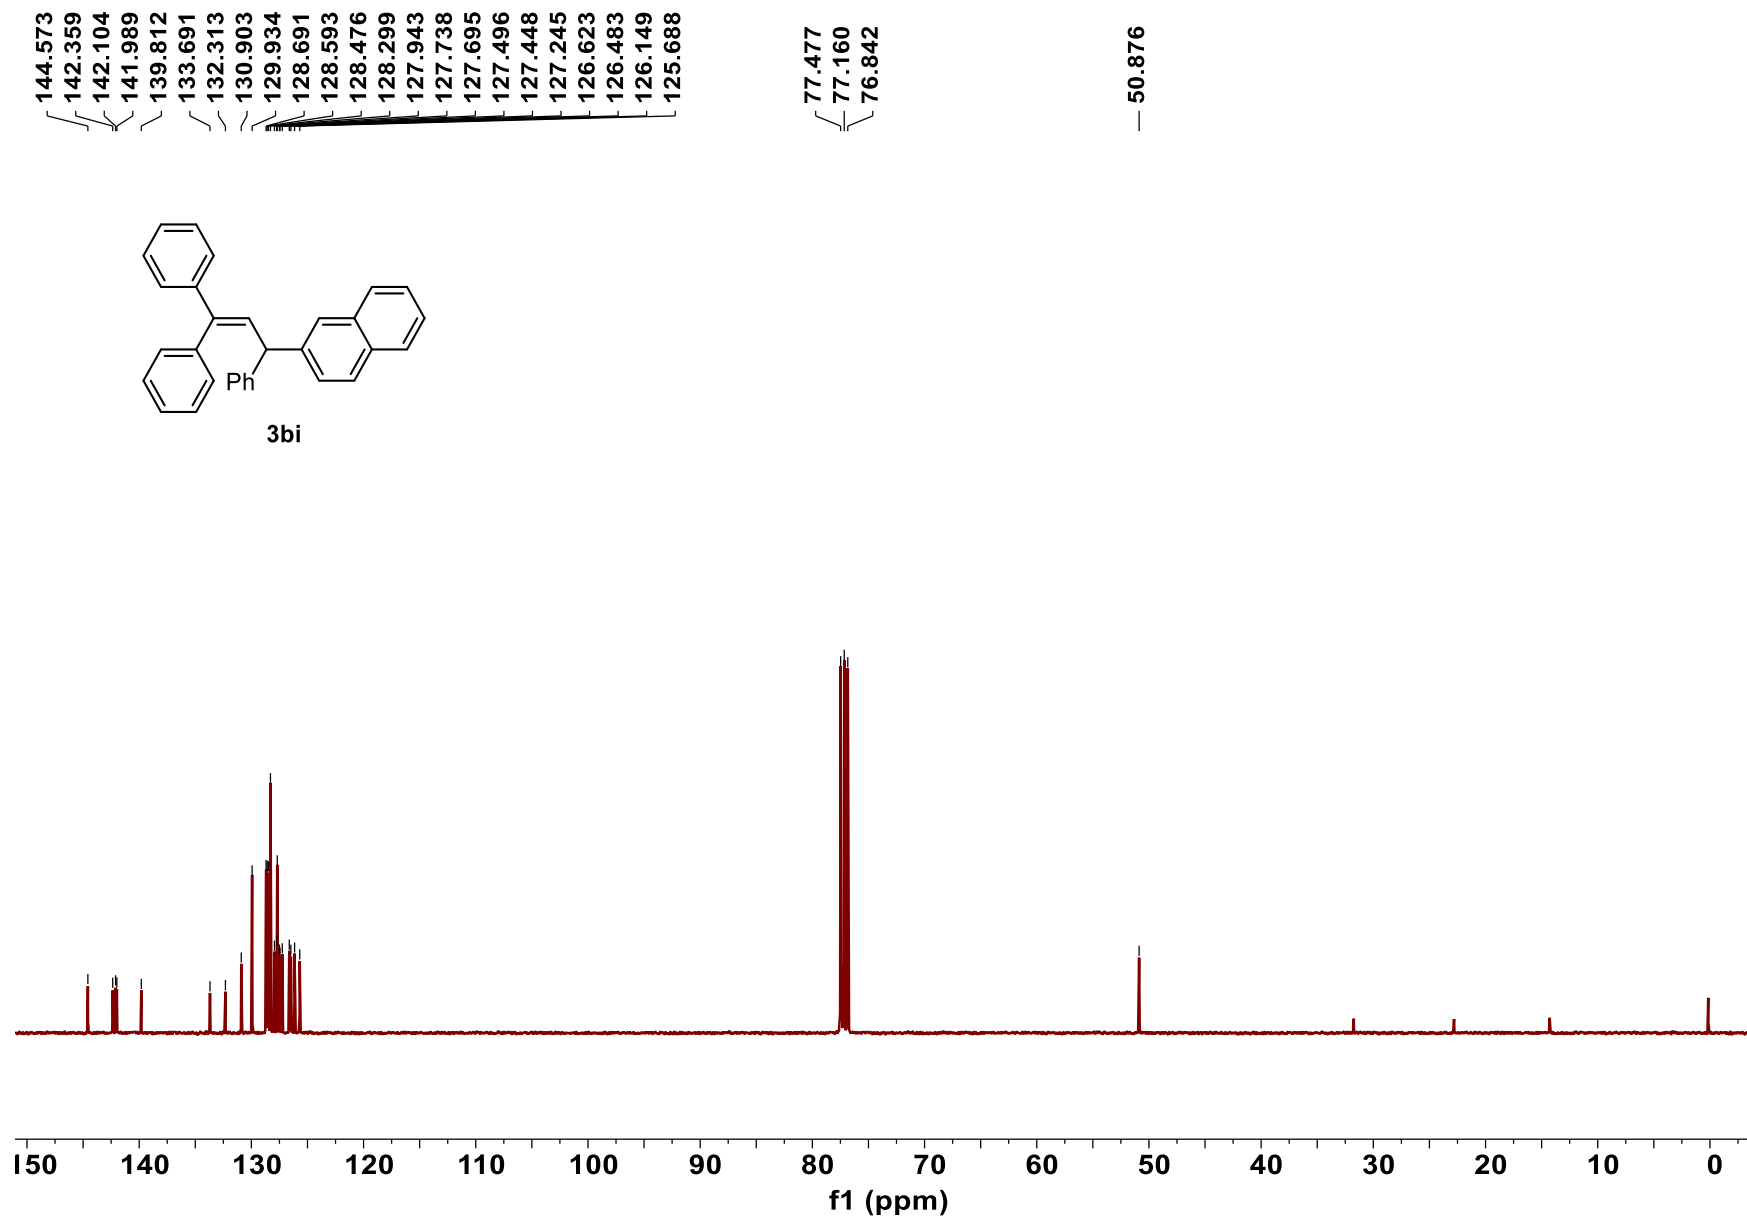



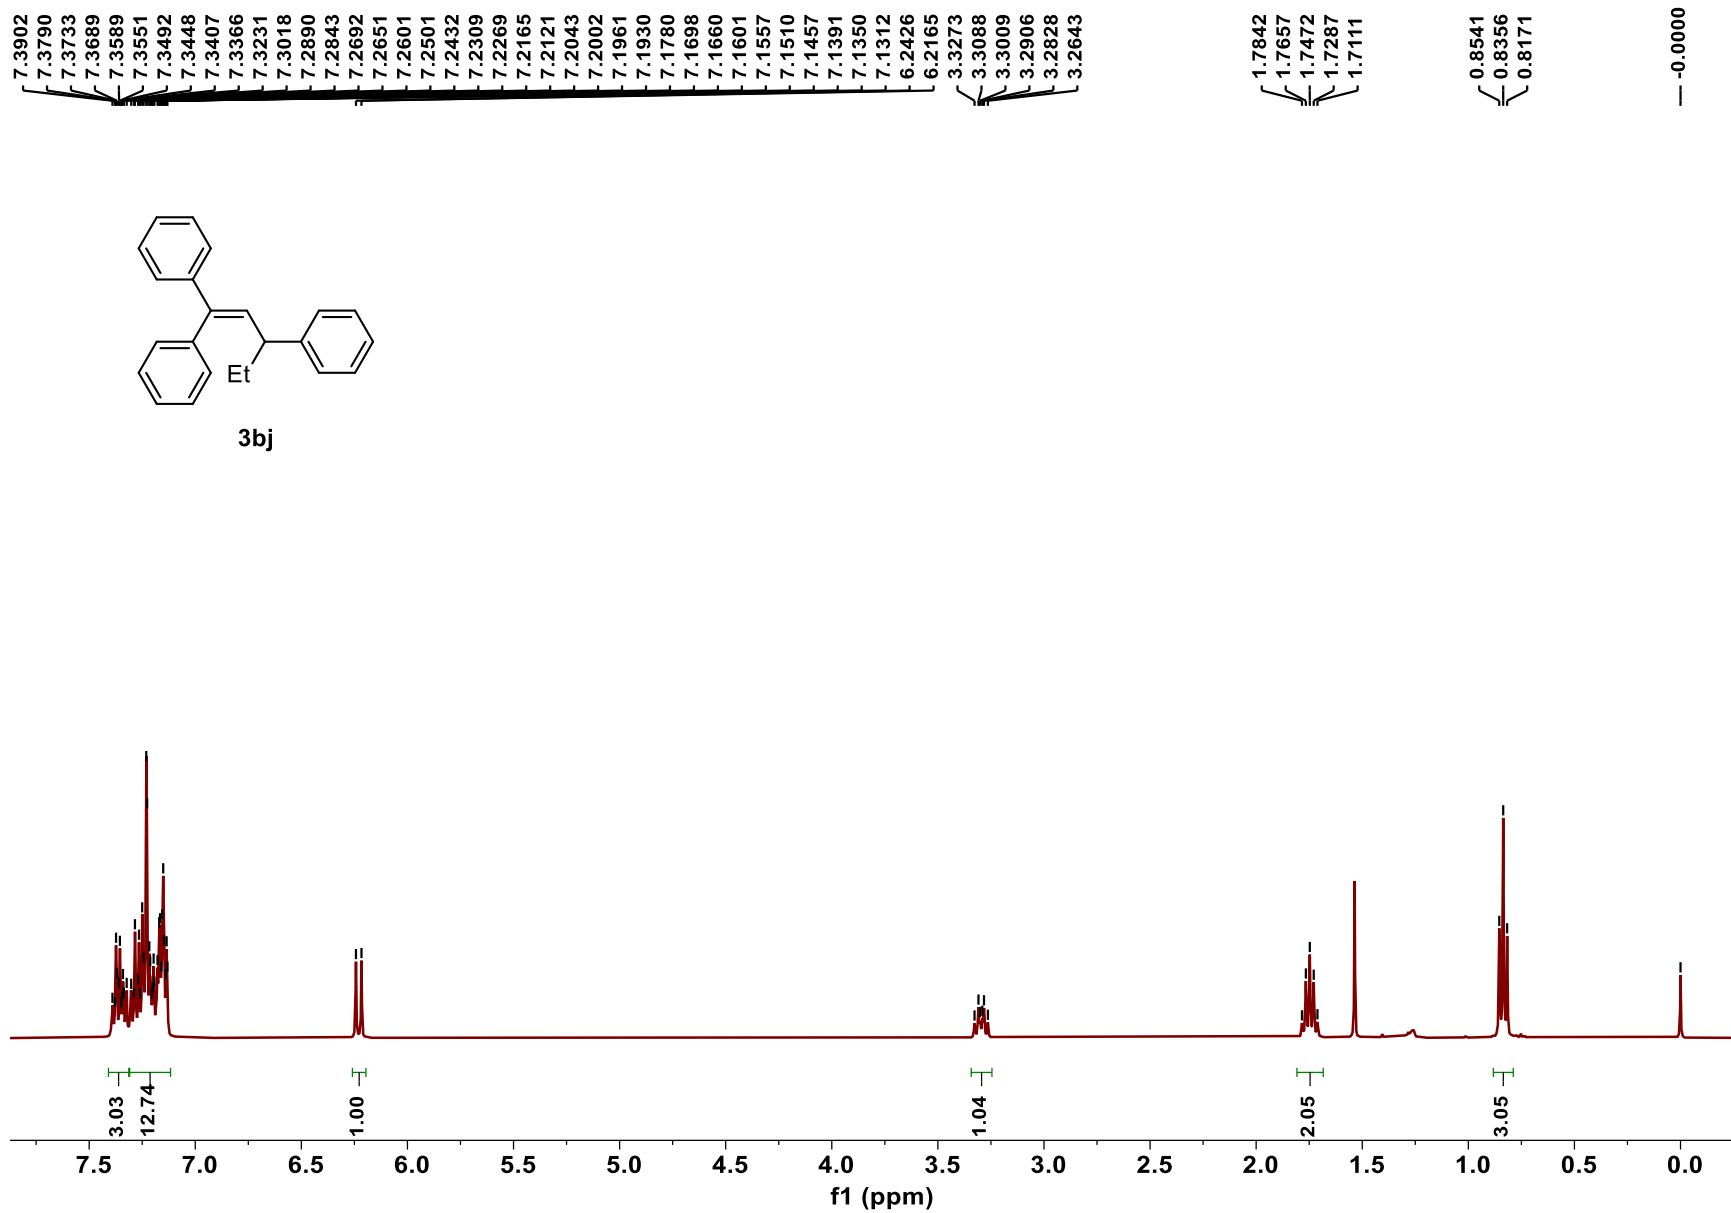



145.478  
142.650  
141.401  
140.346  
133.194  
130.081  
128.624  
128.297  
128.210  
127.534  
127.360  
127.113  
126.111

77.479  
77.160  
76.845

— 47.201

— 30.453

— 12.319

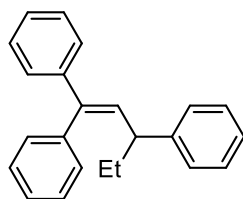

3bj

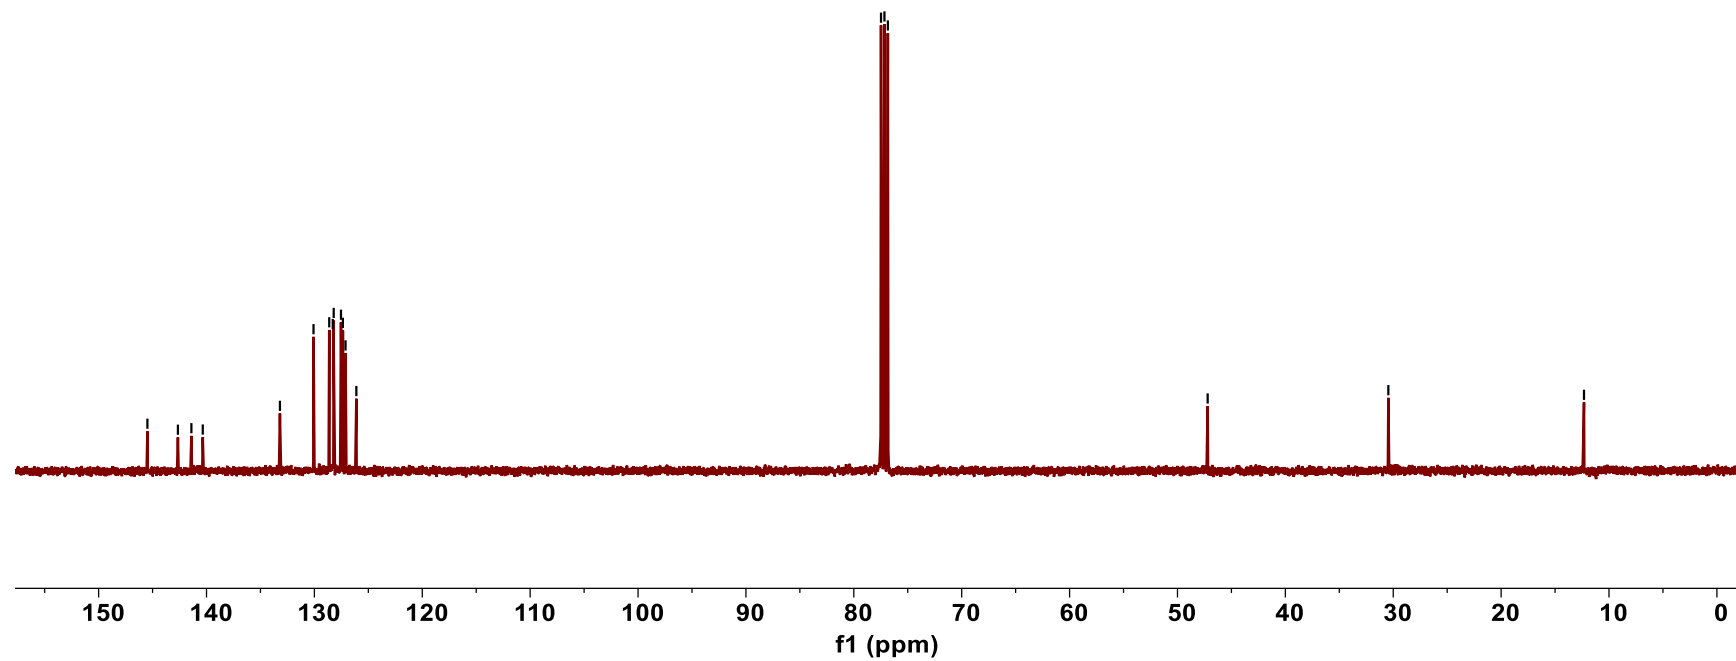



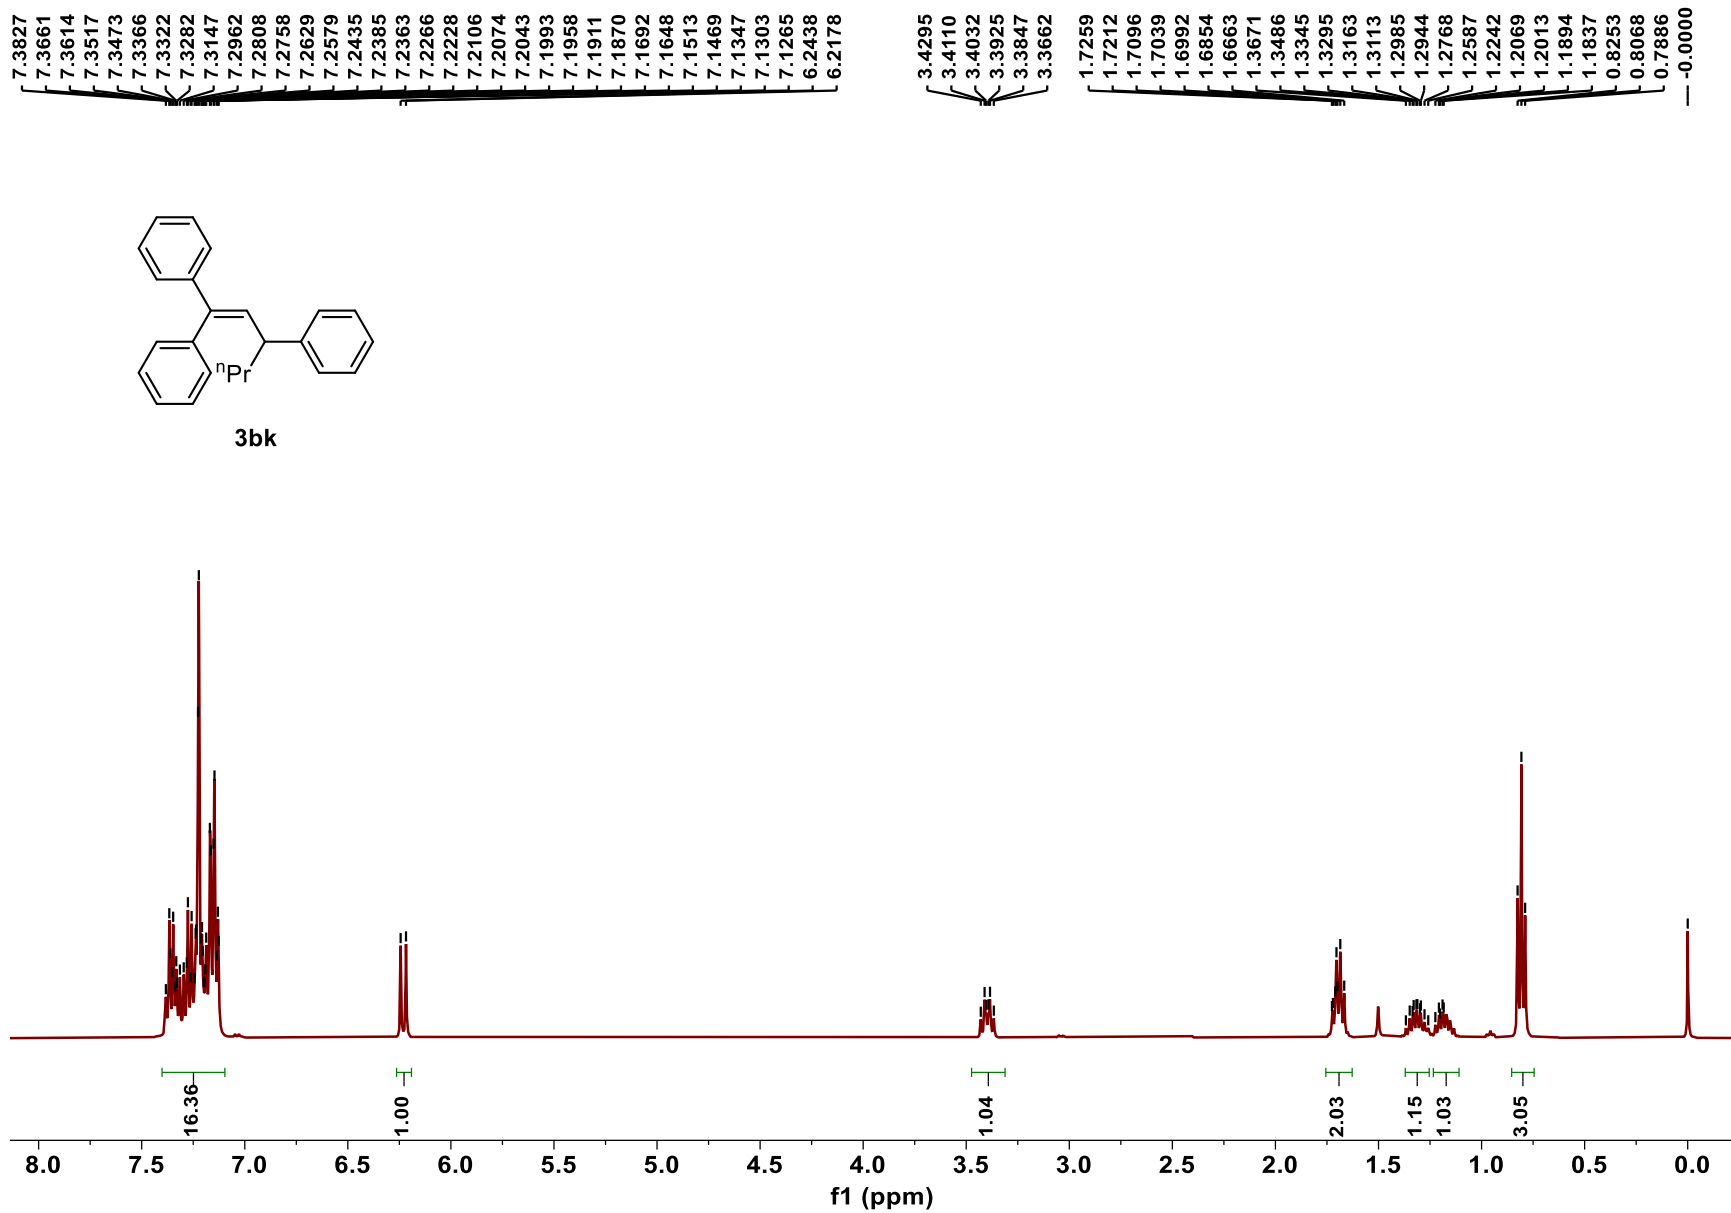



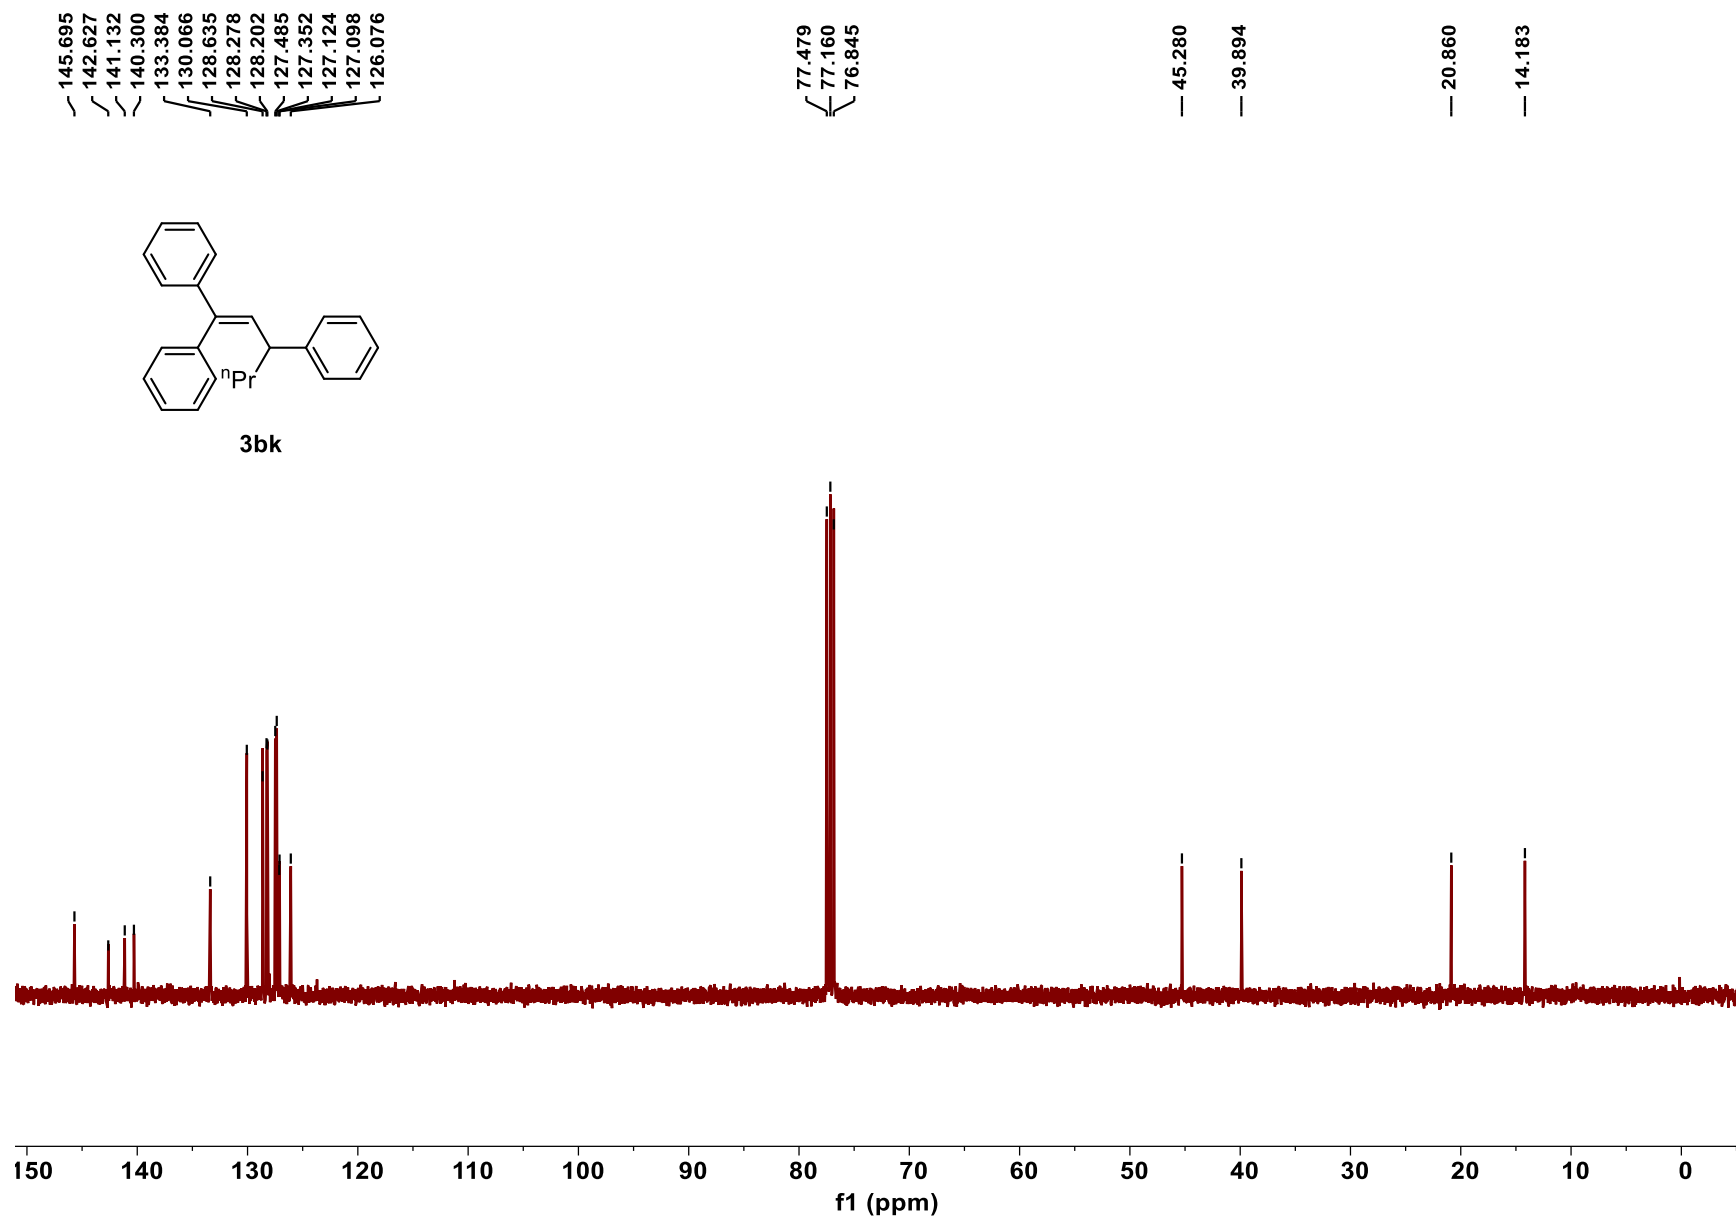



7.3670  
7.3492  
7.3382  
7.2748  
7.2711  
7.2557  
7.2501  
7.2403  
7.2278  
7.2228  
7.2112  
7.2071  
7.1892  
7.1701  
7.1193  
7.1155  
7.1112  
7.1071  
7.1017  
7.0983  
7.0952  
7.0908  
7.0873  
6.3376  
6.3106

3.0404  
3.0181  
3.0134  
2.9911

2.0288  
2.0118  
2.0062  
1.9952  
1.9893  
1.9786  
1.9726  
1.9620  
1.9560  
1.9394

0.9796  
0.9629

— -0.0000

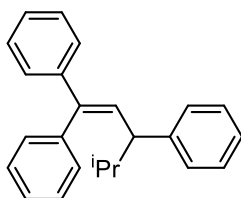

**3bl**

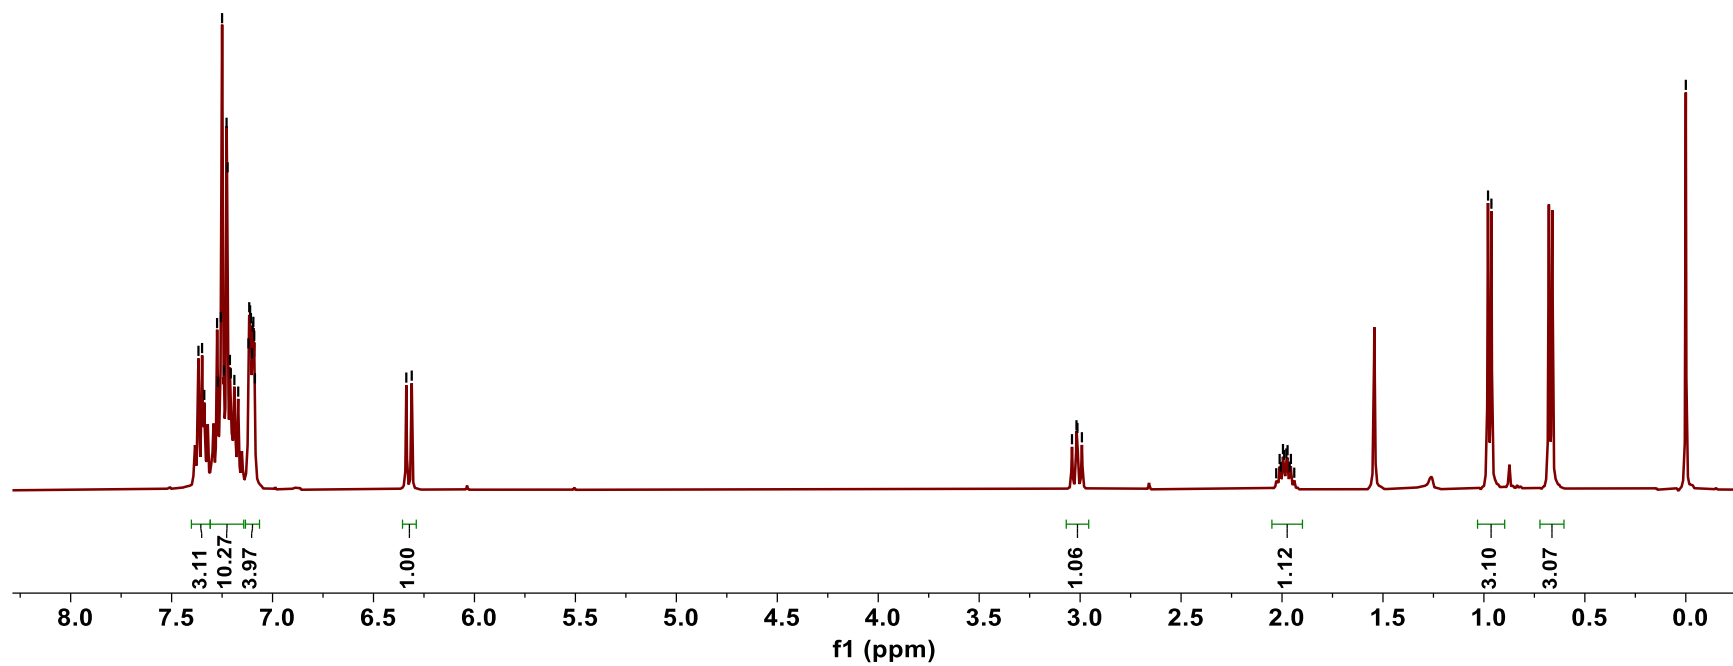



144.951  
142.787  
141.481  
140.433  
132.454  
130.135  
128.536  
128.236  
128.202  
128.035  
127.306  
127.063  
127.045  
126.004

77.479  
77.160  
76.841

53.176

34.564

21.084  
20.917

0.149



3bl

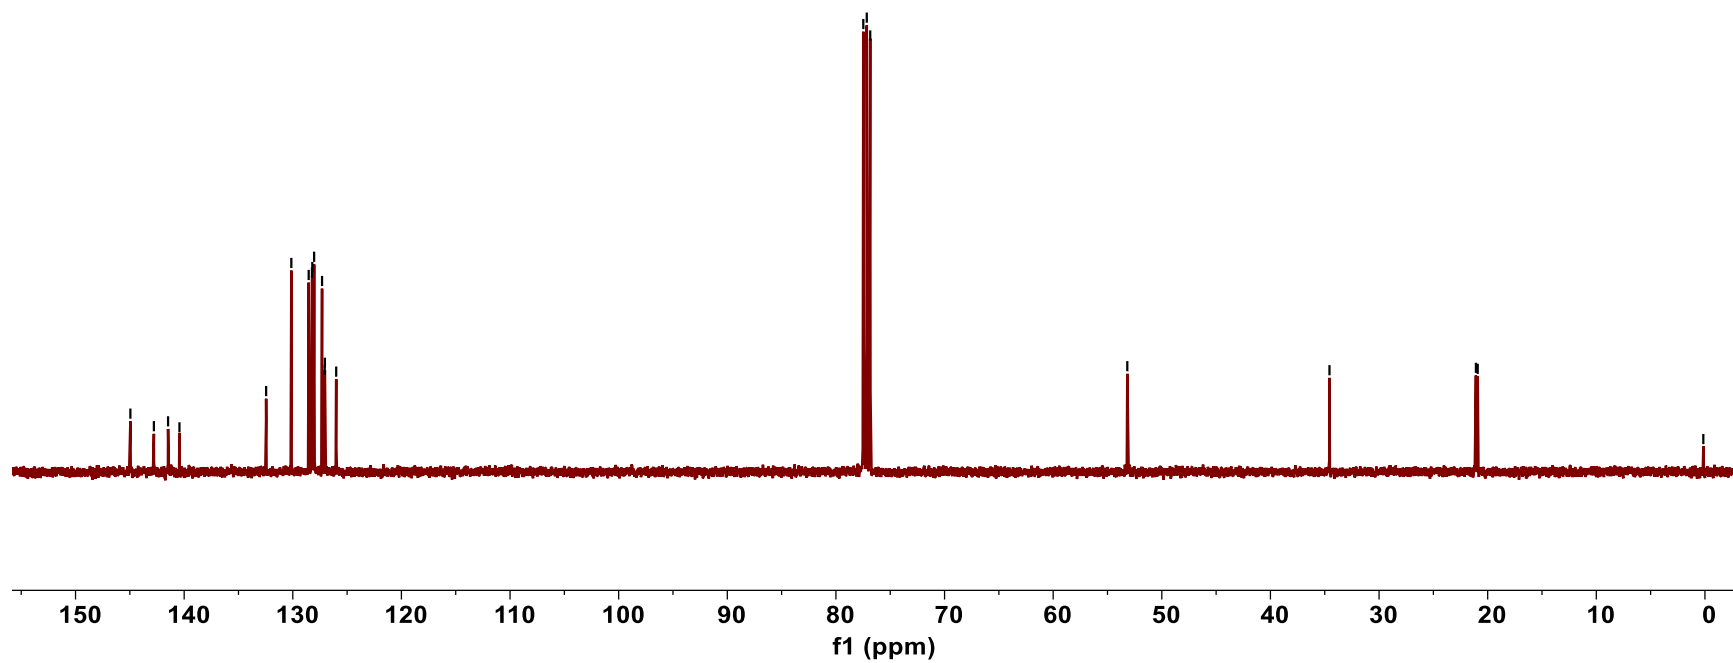

S80



7.3861  
7.3793  
7.3750  
7.3643  
7.3456  
7.3284  
7.3043  
7.2862  
7.2661  
7.2532  
7.2434  
7.2321  
7.2194  
7.2015  
7.1839  
7.1799  
7.1647  
7.1467  
6.5569  
6.5305

4.8263  
4.7999

0.0000

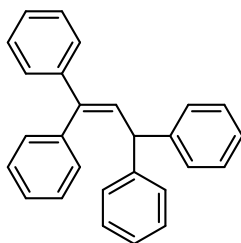

3bm

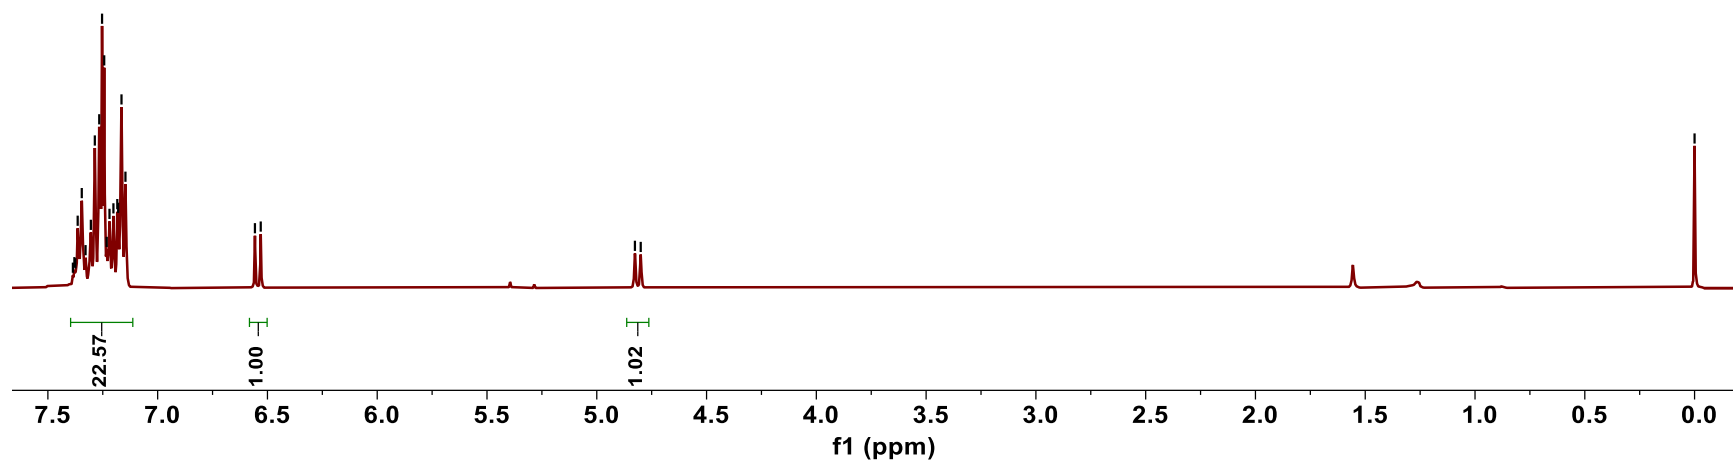



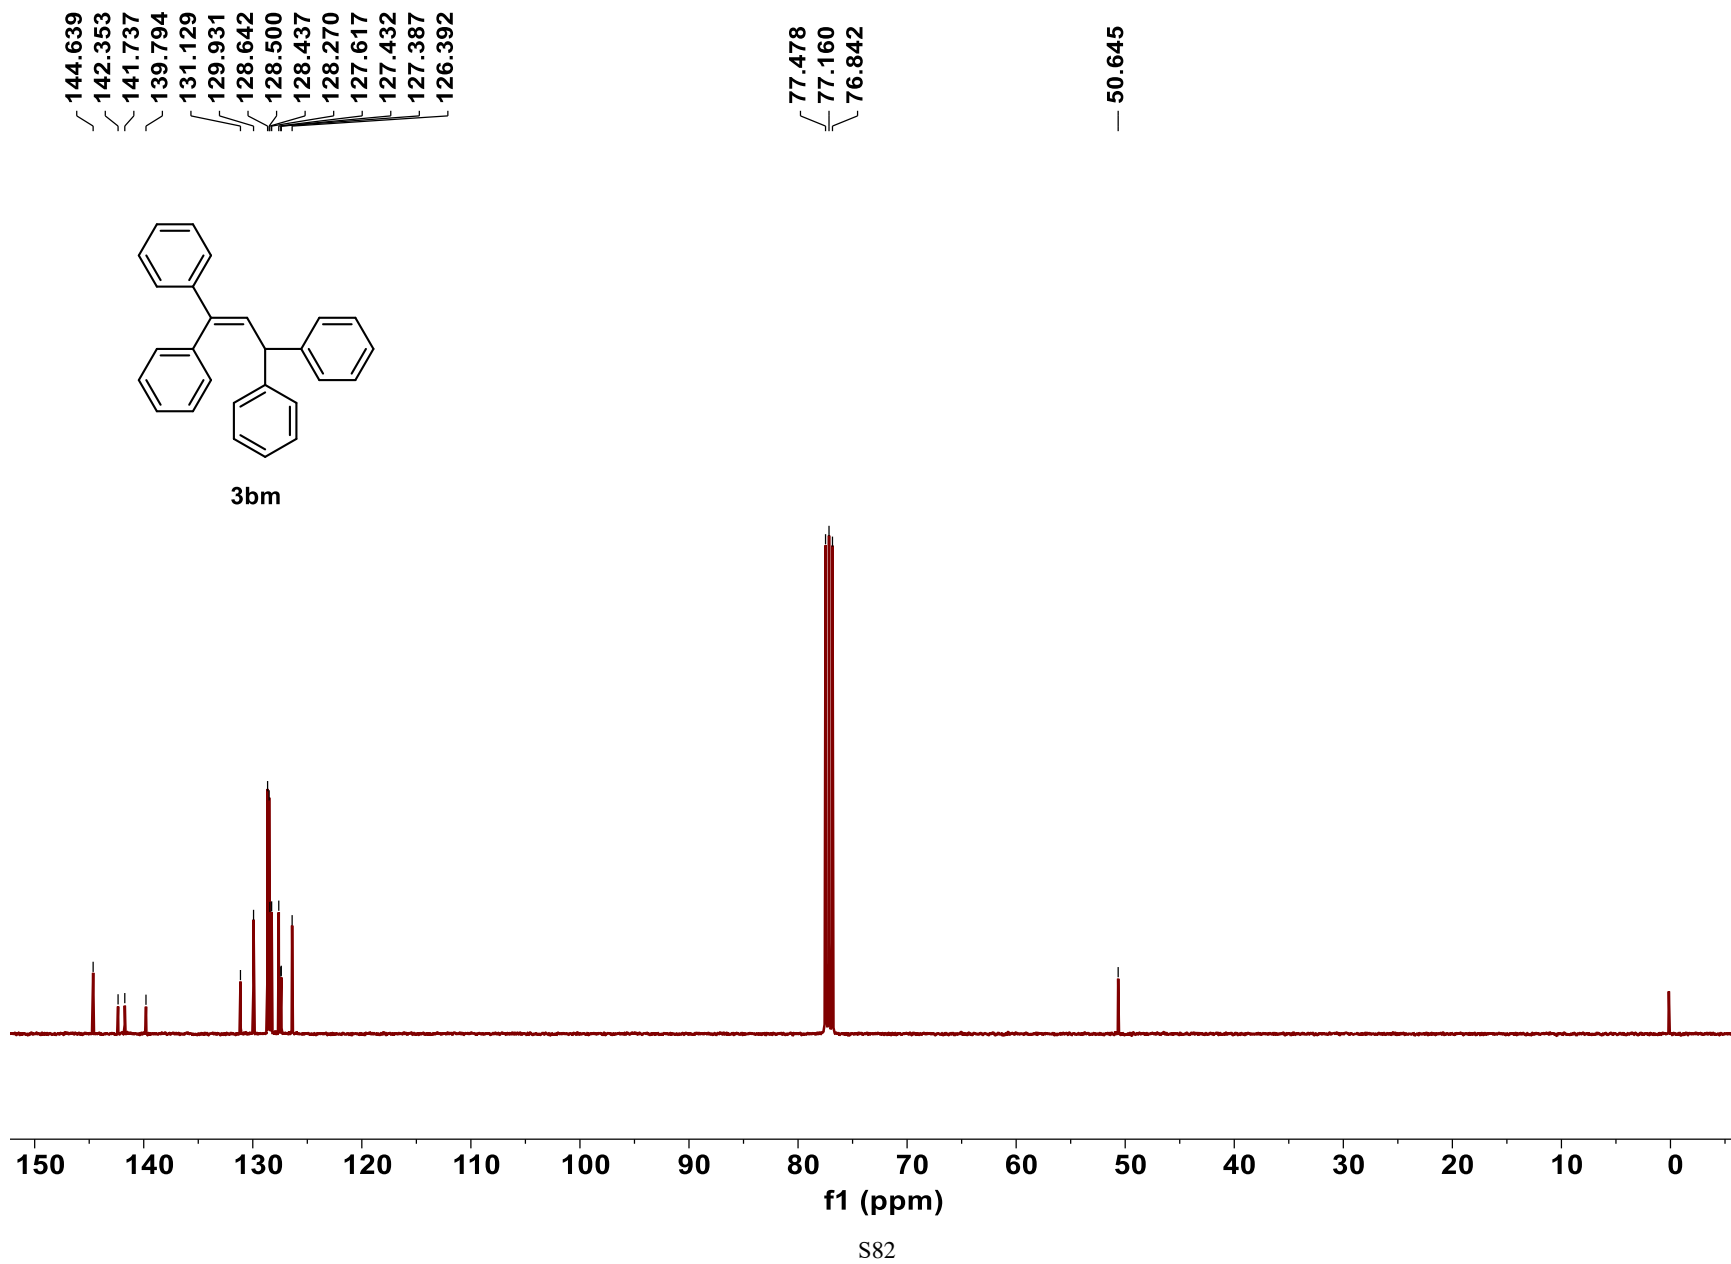



7.3814  
7.3674  
7.3542  
7.3494  
7.3451  
7.3357  
7.3328  
7.3101  
7.3061  
7.2923  
7.2734  
7.2612  
7.2504  
7.2400  
7.2330  
7.2139  
7.1589  
7.1538  
7.1488  
7.1389  
7.1352  
7.1161  
7.0892  
7.0684  
6.4860  
6.4597  
4.7871  
4.7608

— 0.0000

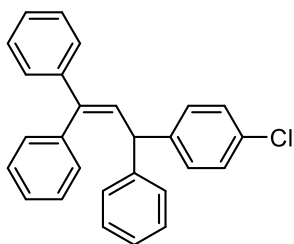

3bn

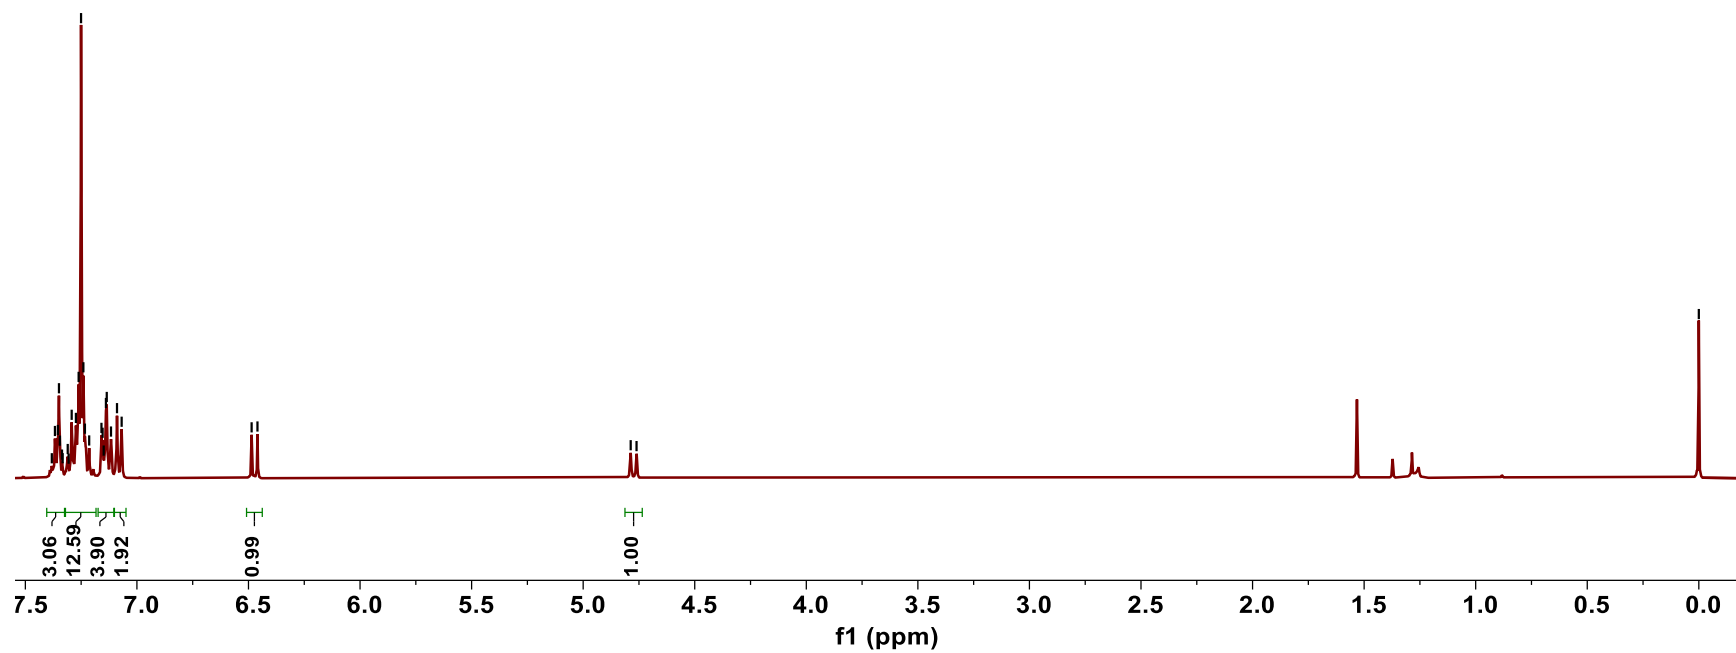



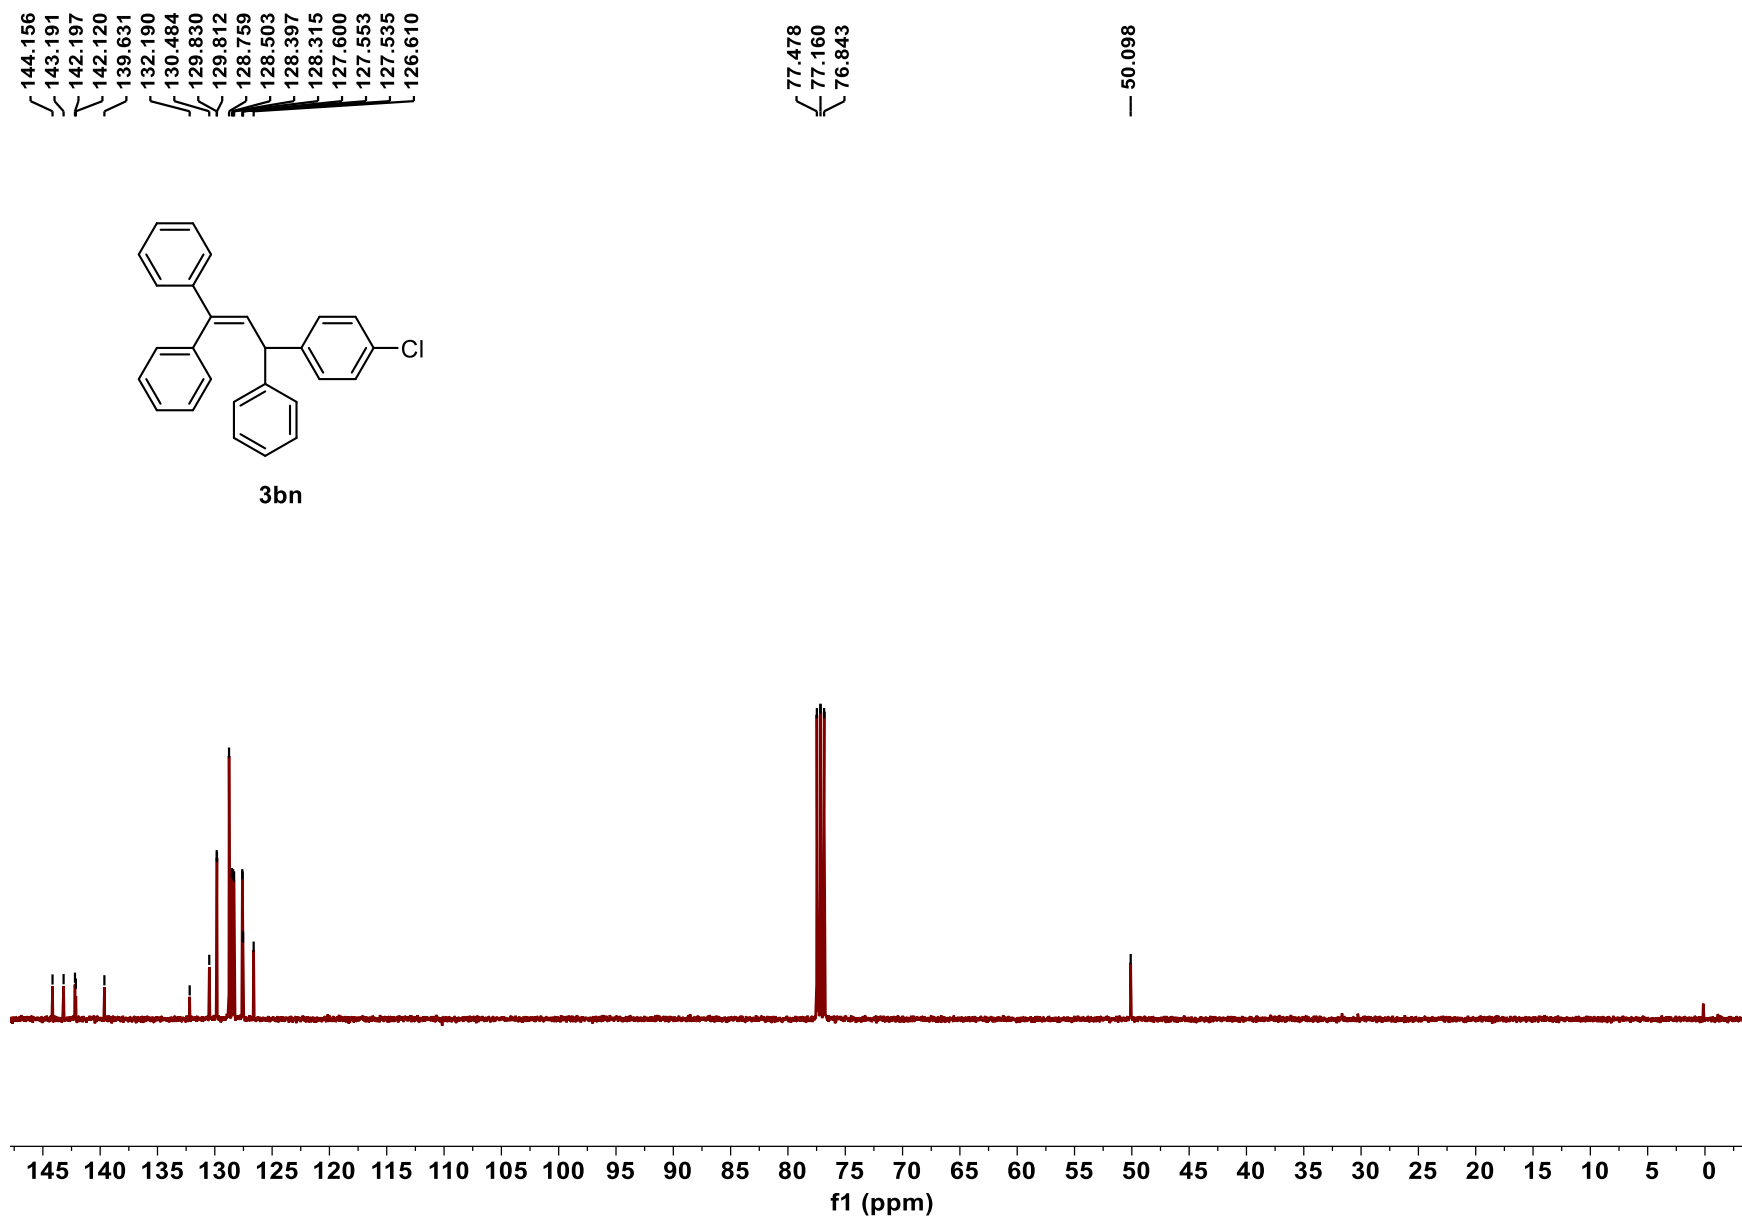



7.3680  
7.3630  
7.3589  
7.3548  
7.3492  
7.3445  
7.3423  
7.3360  
7.2617  
7.2573  
7.2498  
7.2451  
7.2373  
7.2316  
7.2269  
7.1507  
7.1451  
7.1404  
7.1357  
7.1313  
7.1269  
7.0993  
7.0936  
7.0858  
7.0773  
7.0698  
7.0639  
6.9942  
6.9886  
6.9804  
6.9779  
6.9726  
6.9666  
6.9560  
6.9507  
6.4477  
6.4213  
4.7729  
4.7466

— 0.0000

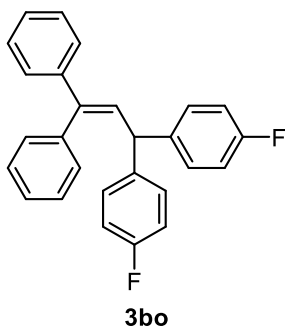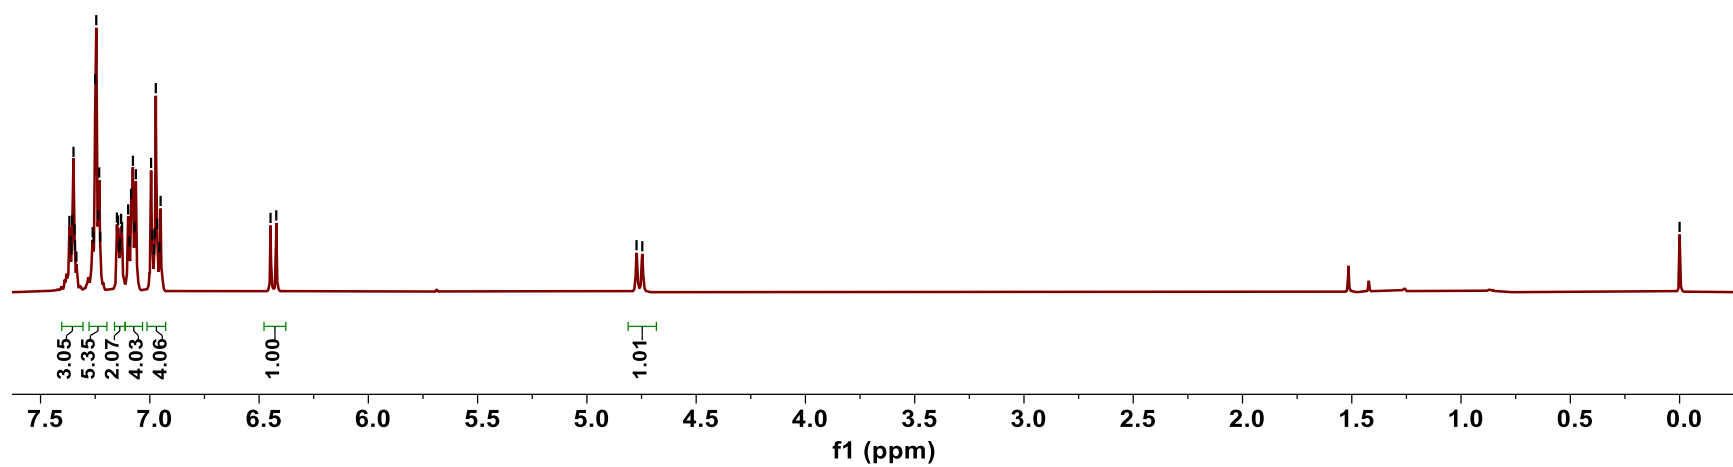



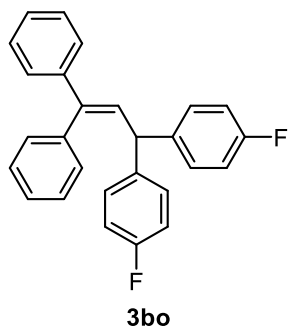

— 162.819  
— 160.382

142.100  
142.027  
140.190  
140.156  
139.579  
130.586  
129.846  
129.755  
128.536  
128.346  
127.602  
127.583  
115.618  
115.405

77.475  
77.160  
76.841

— 49.179

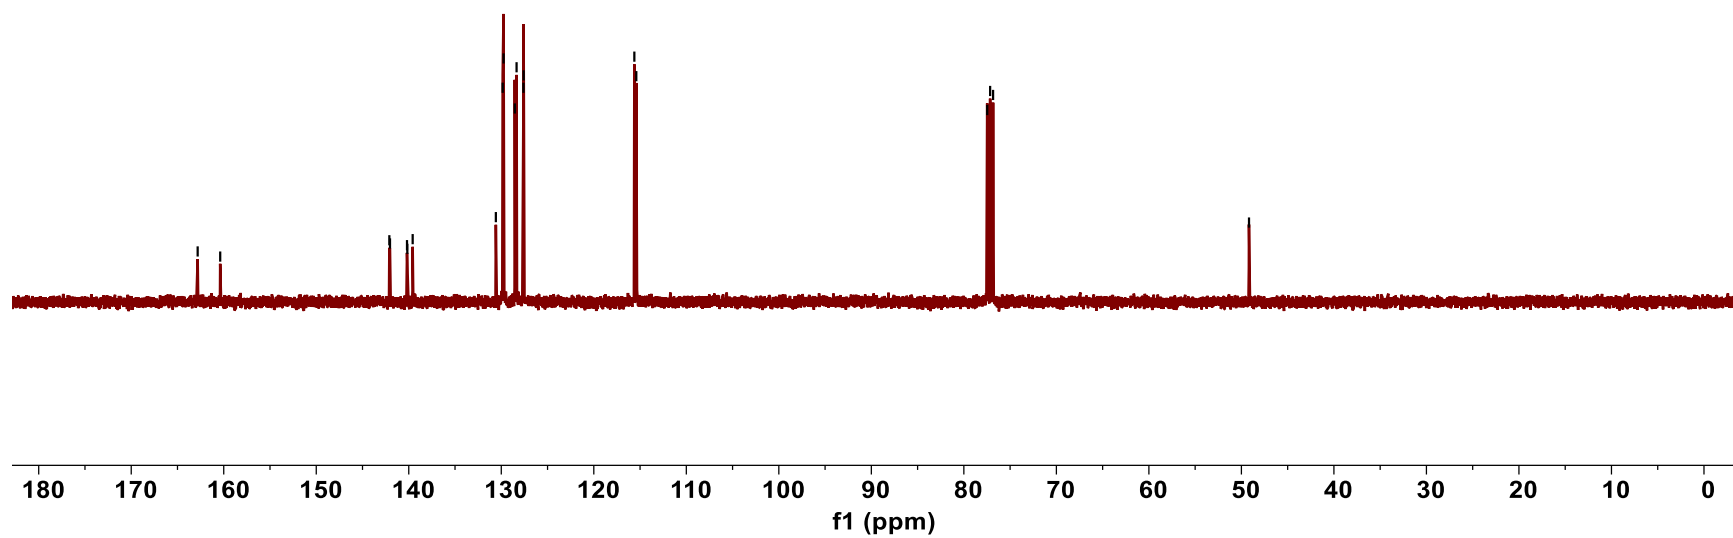



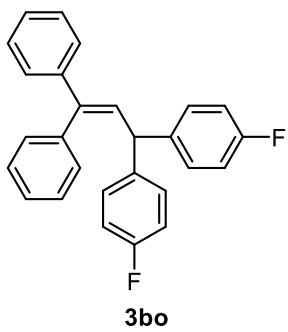

— -115.3855

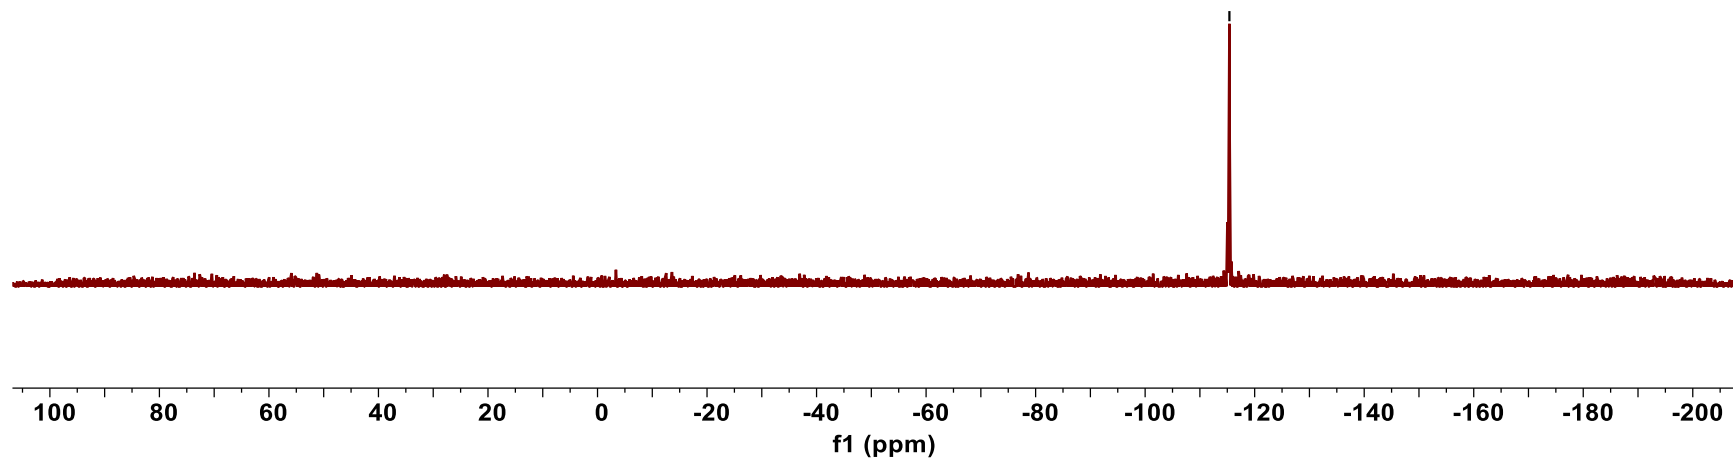



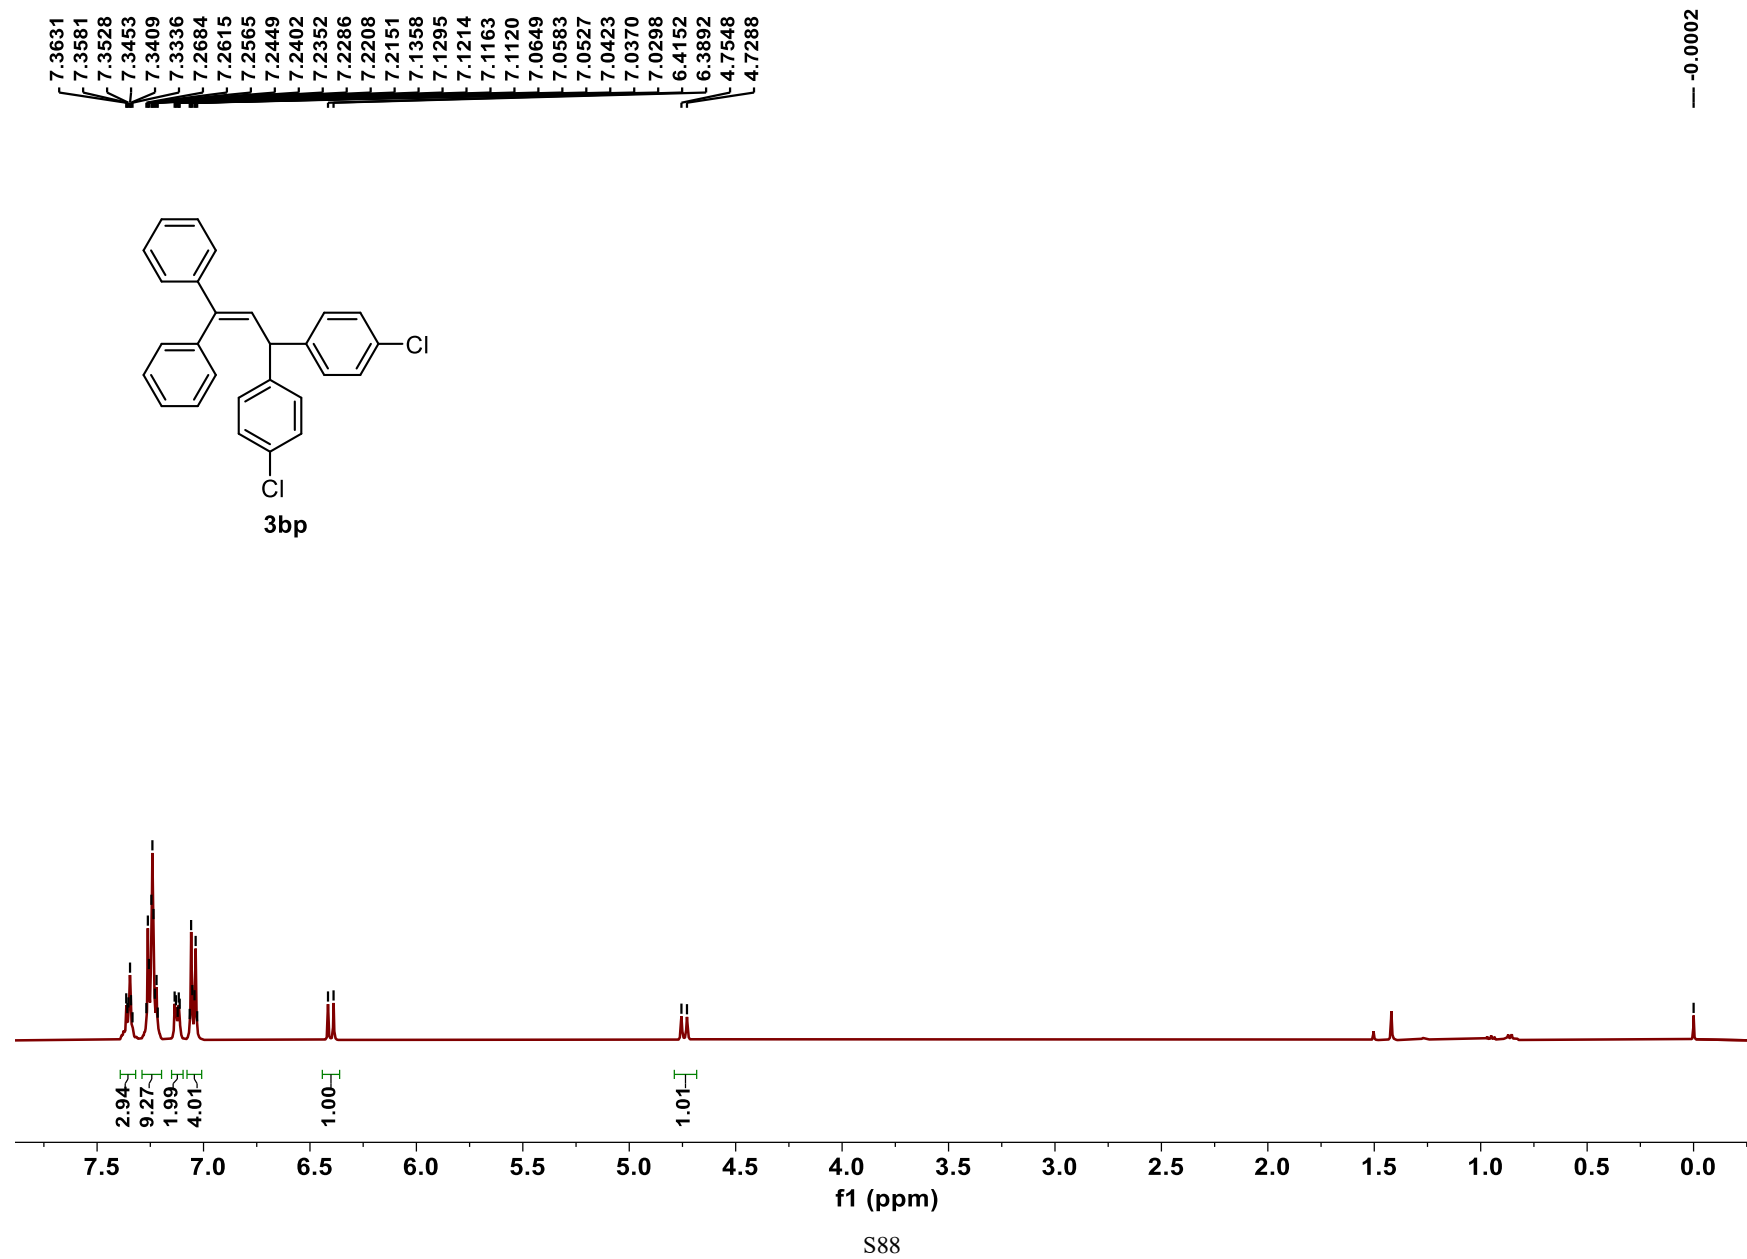



142.681  
142.639  
141.887  
139.458  
132.435  
129.831  
129.732  
129.698  
128.886  
128.574  
128.358  
127.679  
127.595

77.475  
77.160  
76.841

— 49.521

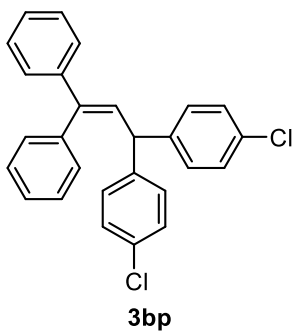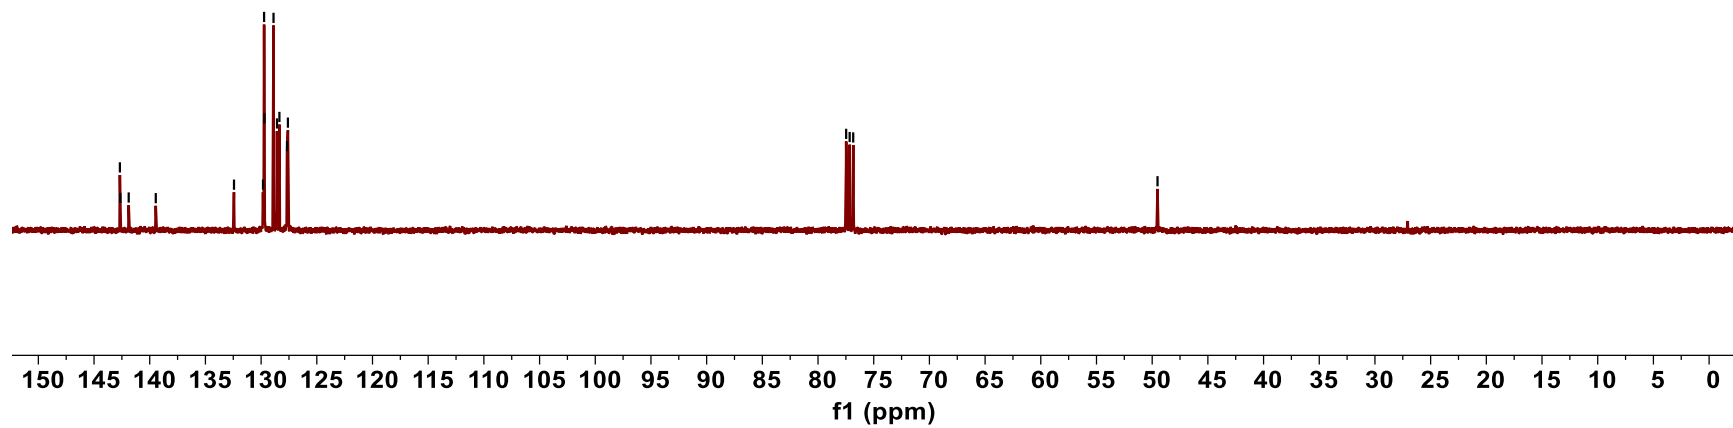



7.3654  
7.3499  
7.3318  
7.3274  
7.3233  
7.3114  
7.2508  
7.2471  
7.2396  
7.2210  
7.2157  
7.2033  
7.1815  
7.1770  
7.1617  
7.1582  
7.0961  
7.0759  
7.0481  
7.0277  
6.5229  
6.4964

4.7509  
4.7244

2.3104

0.0000

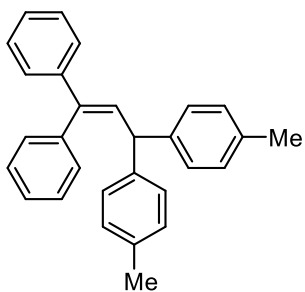

**3bq**

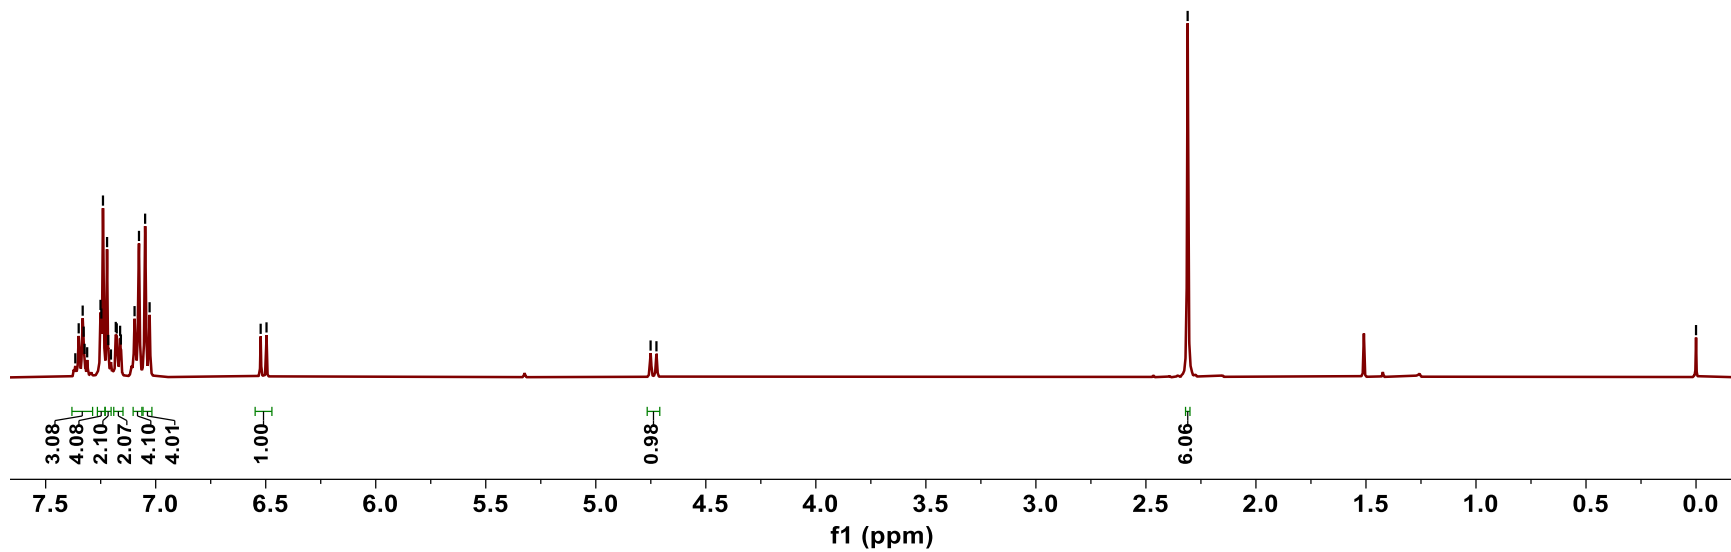



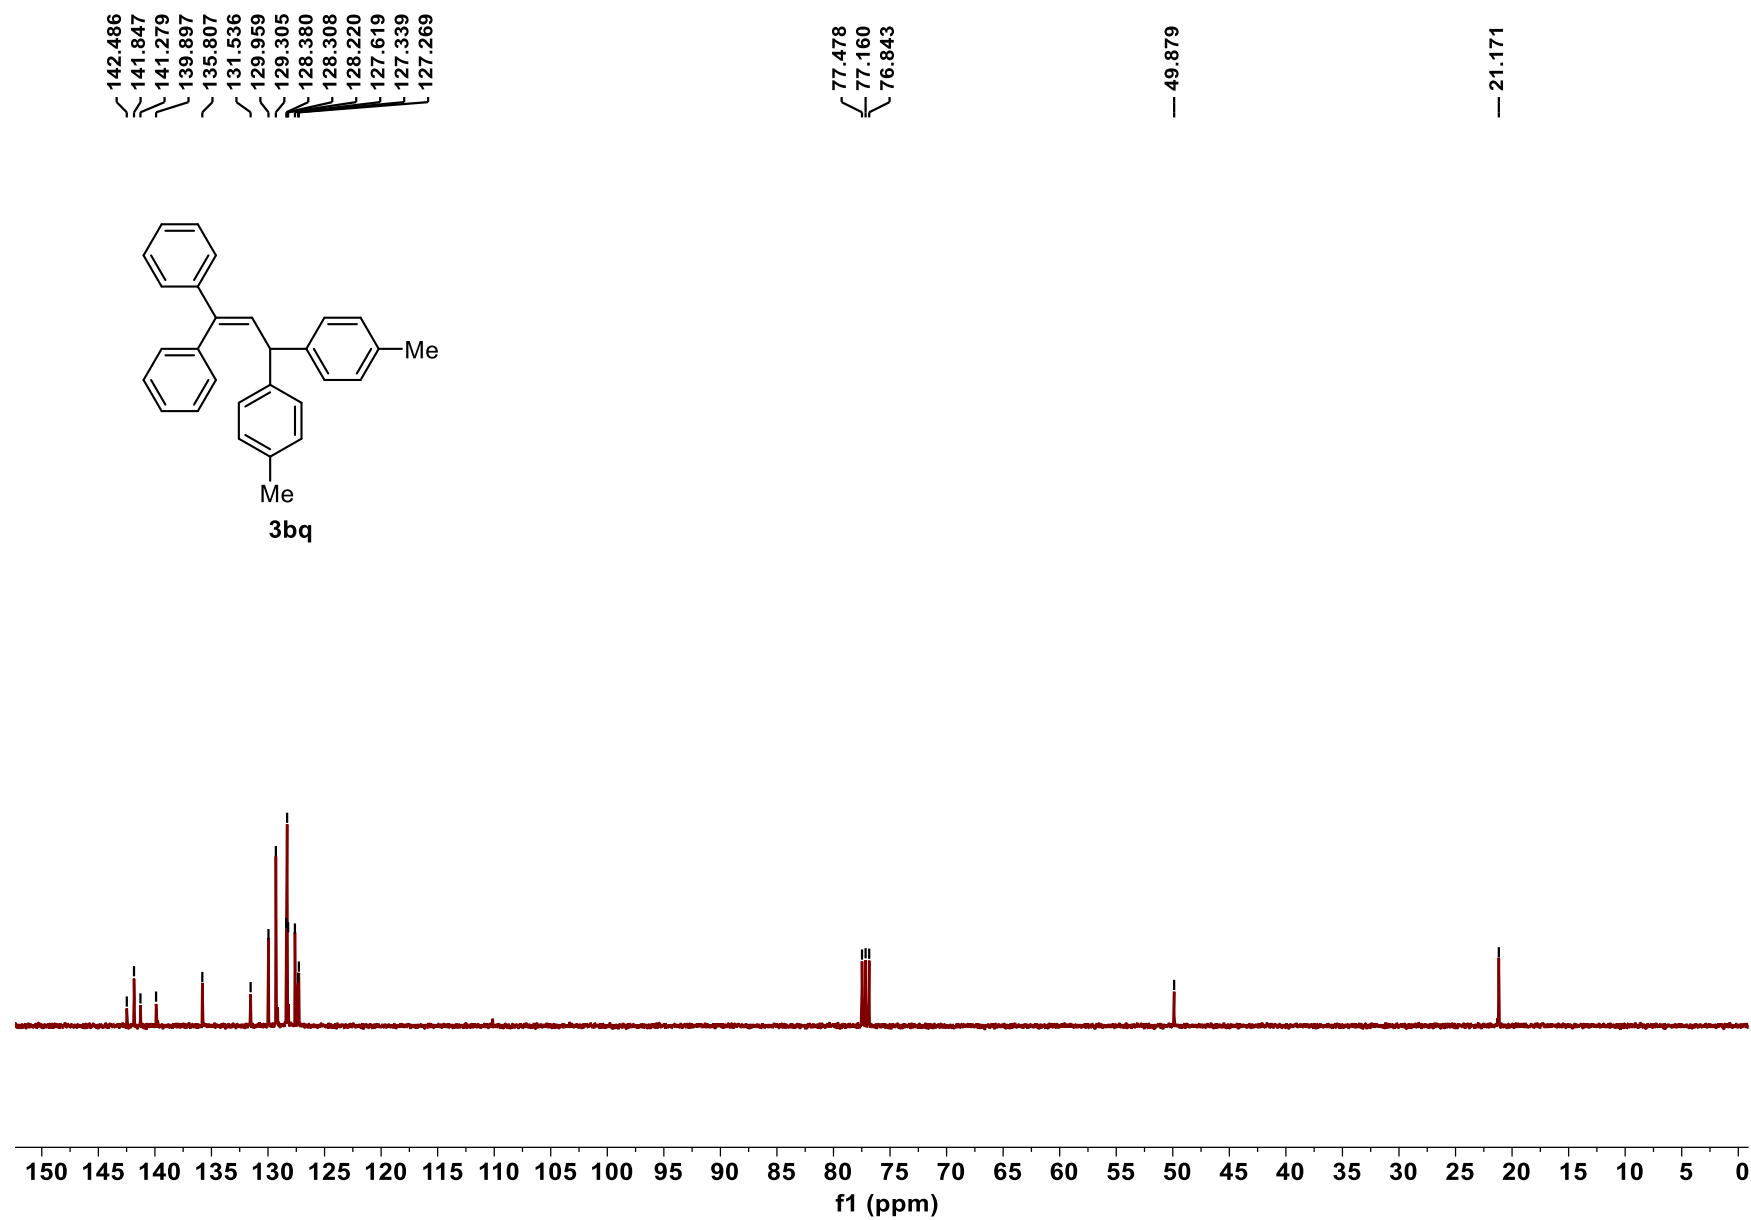



7.3750  
7.3598  
7.3419  
7.3380  
7.3337  
7.3225  
7.2532  
7.2467  
7.2391  
7.2354  
7.2297  
7.2246  
7.2142  
7.1805  
7.1759  
7.1708  
7.1607  
7.1571  
7.0699  
7.0486  
7.0415  
6.8436  
6.8363  
6.8312  
6.8195  
6.8145  
6.4854  
6.4590  
4.7179  
4.6915

— 3.7842

— -0.0000

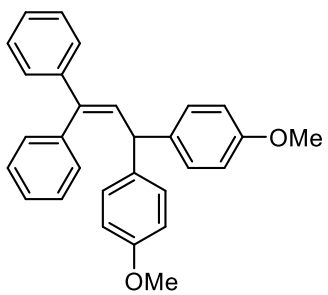

**3br**

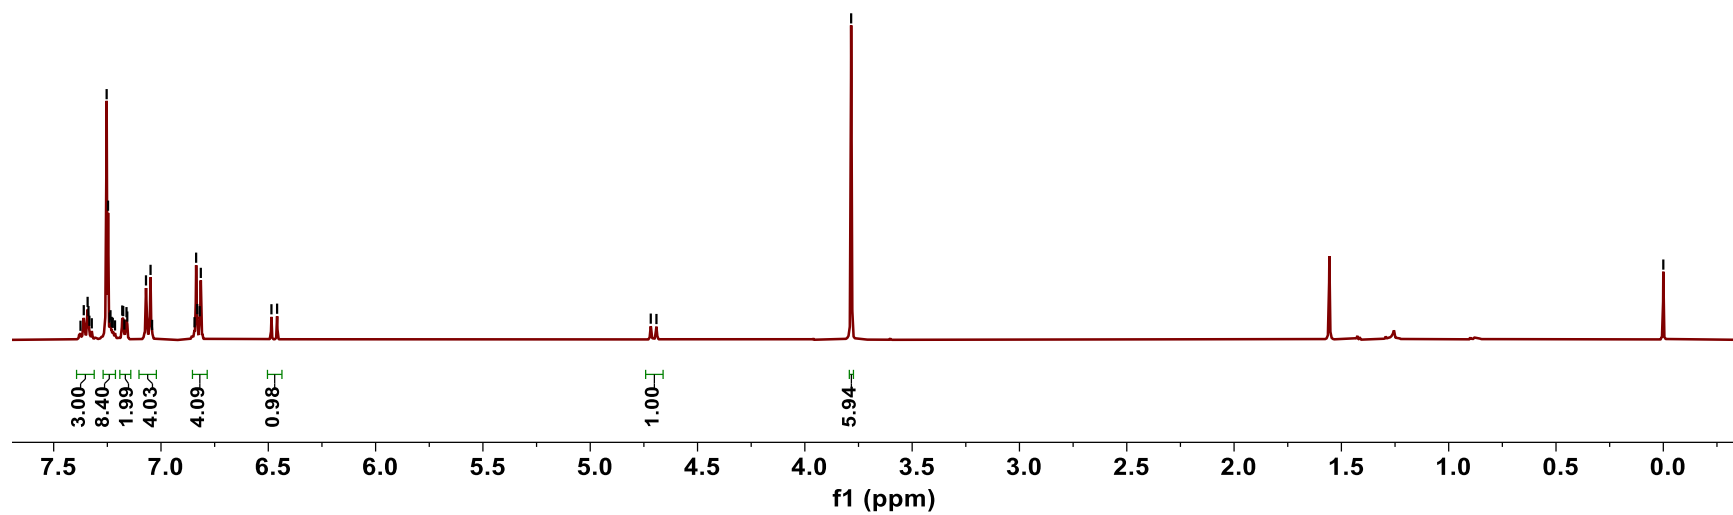



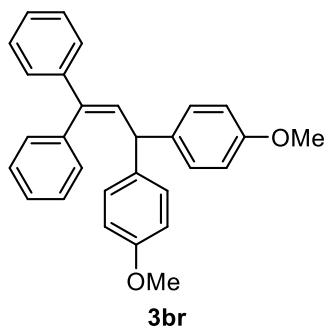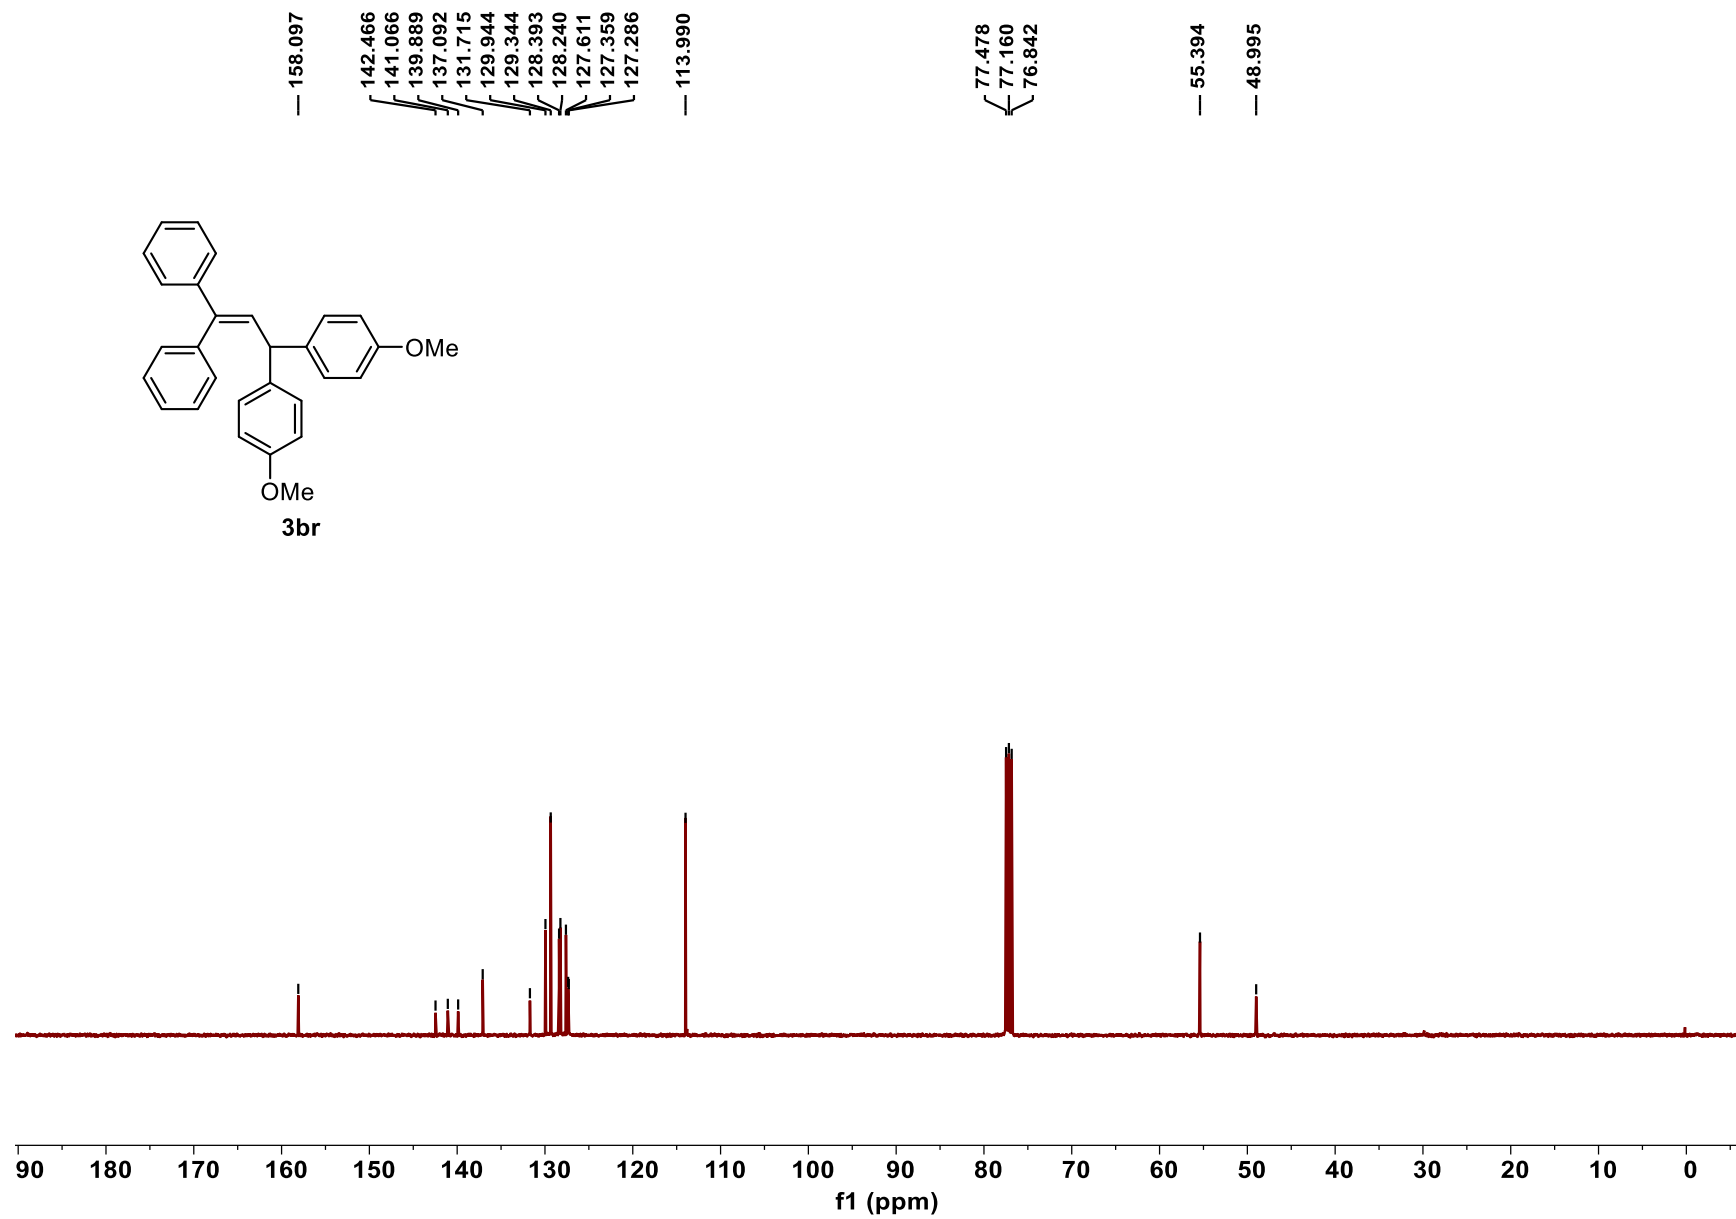



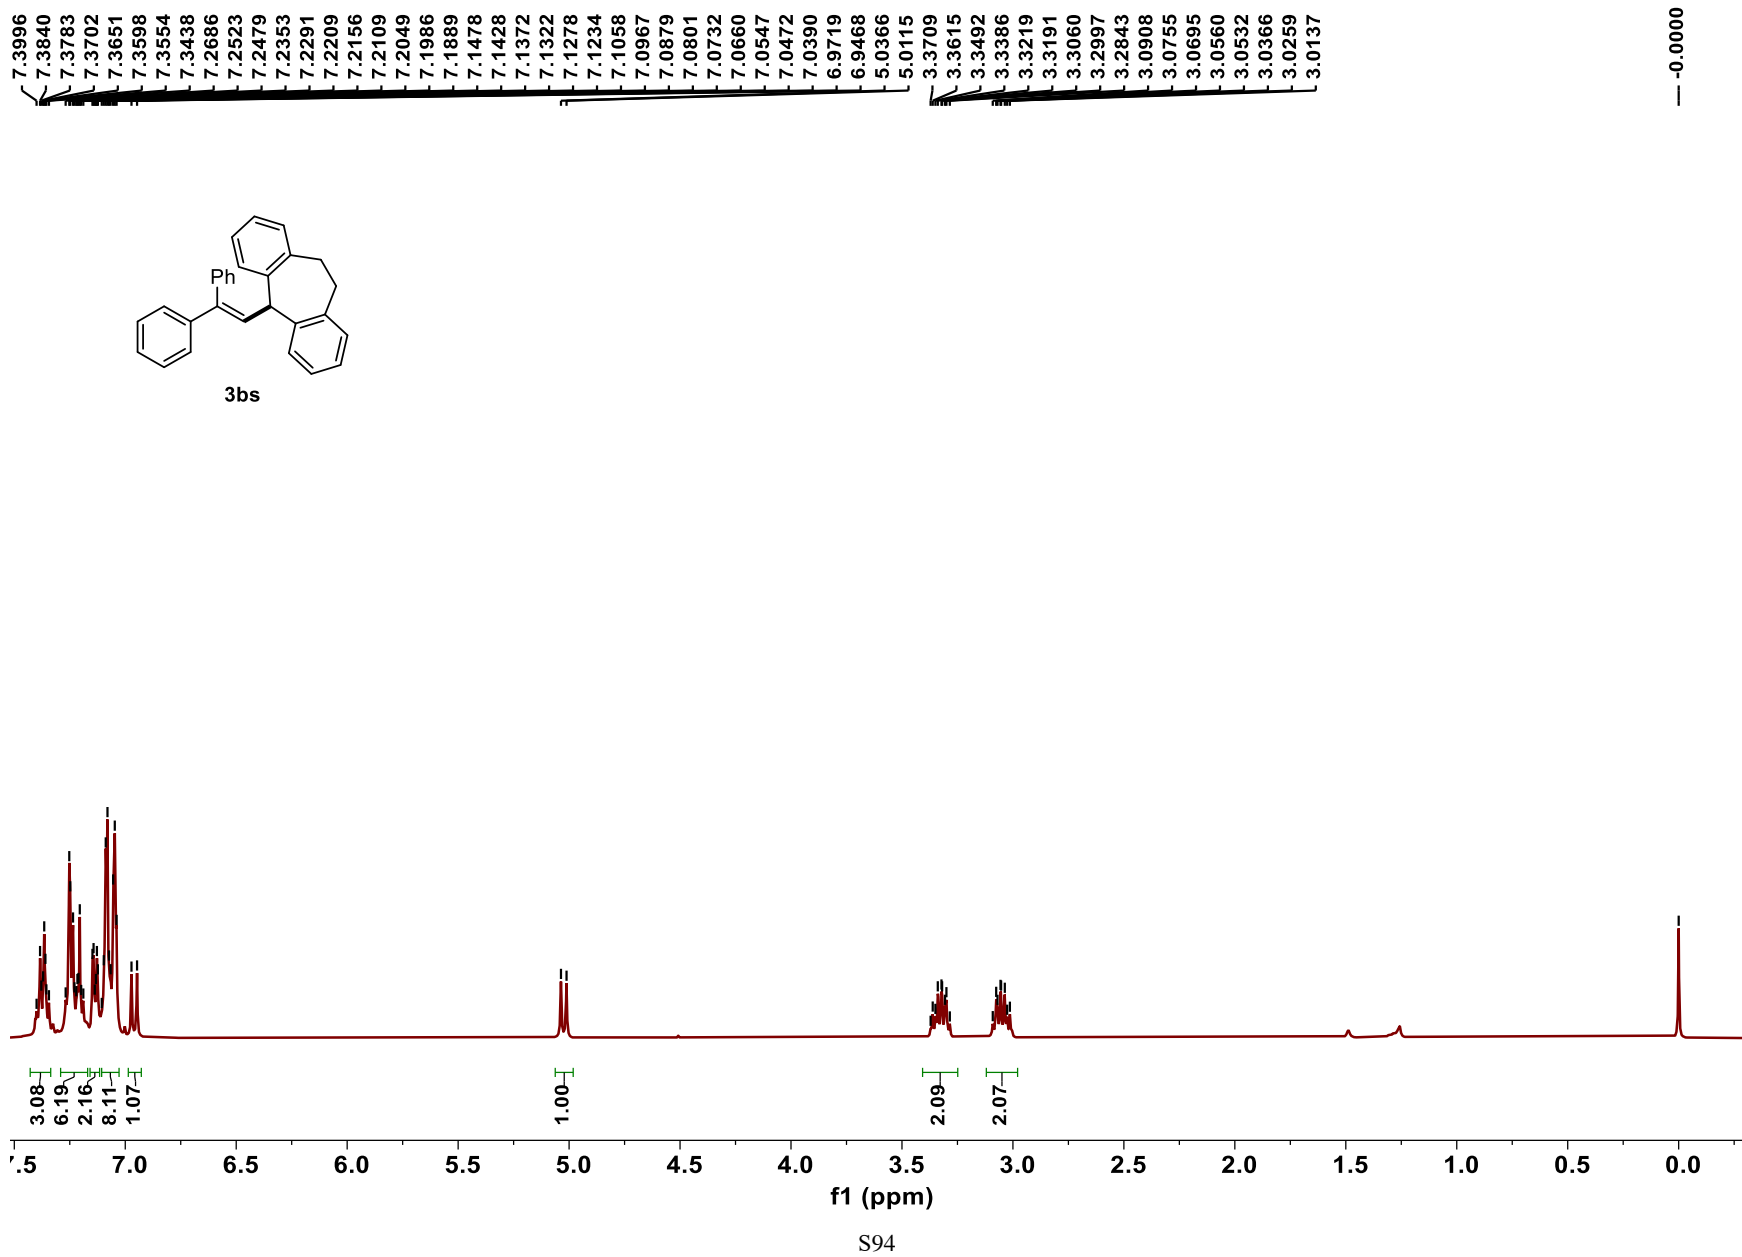



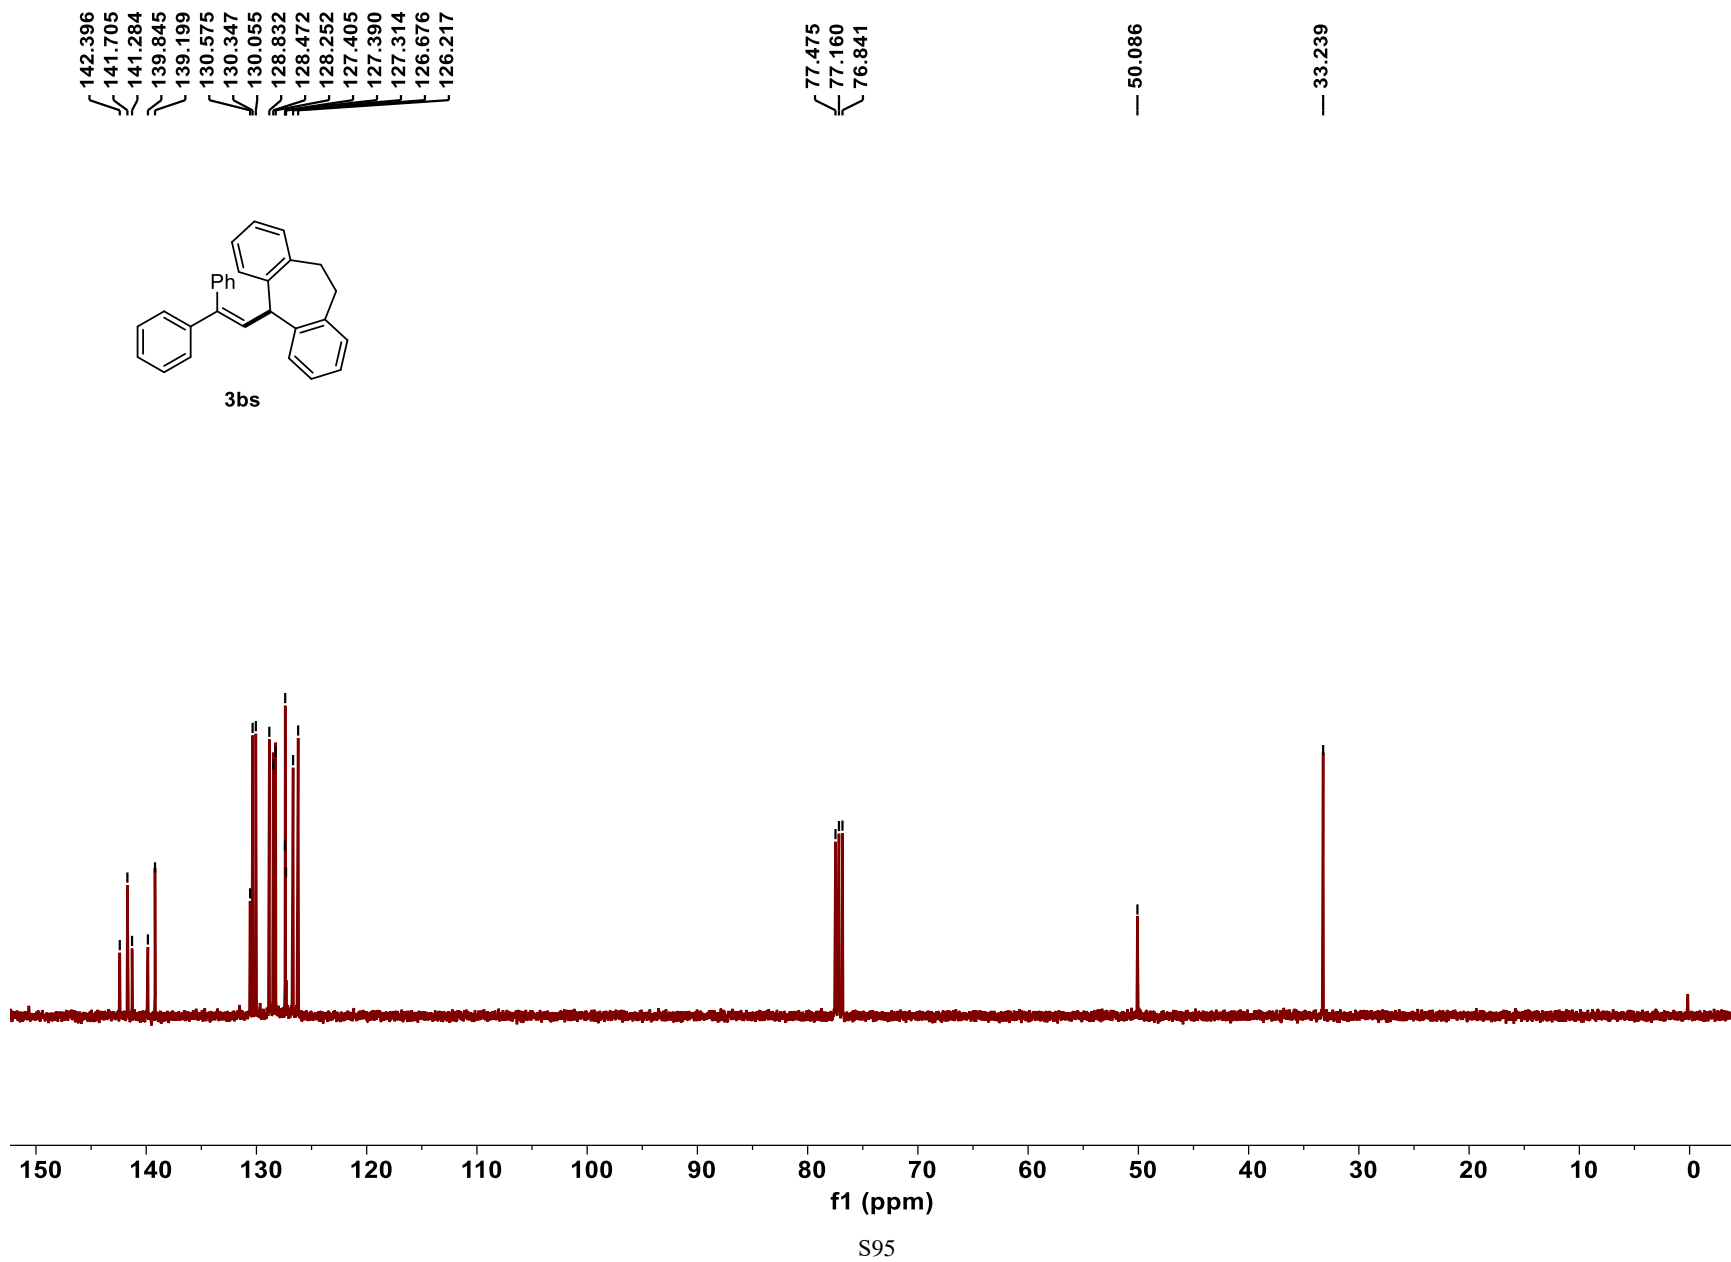



7.3939  
7.3886  
7.3720  
7.3683  
7.3577  
7.3538  
7.3475  
7.3433  
7.3312  
7.3120  
7.3095  
7.3057  
7.3028  
7.2920  
7.2838  
7.2730  
7.2659  
7.2599  
7.2494  
7.2408  
7.2322  
7.2263  
7.2179  
7.2134  
7.2077  
7.2006  
7.1960  
7.1902  
7.1848  
7.1805  
7.1769  
7.1694  
7.1657  
7.1480  
6.9539  
6.9511  
6.9478  
6.9438  
6.9410  
6.8406  
6.8376  
6.8281  
6.8251  
6.5112  
6.4849  
4.8320  
4.8057

0.0000

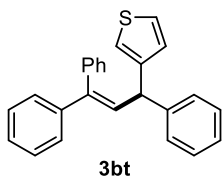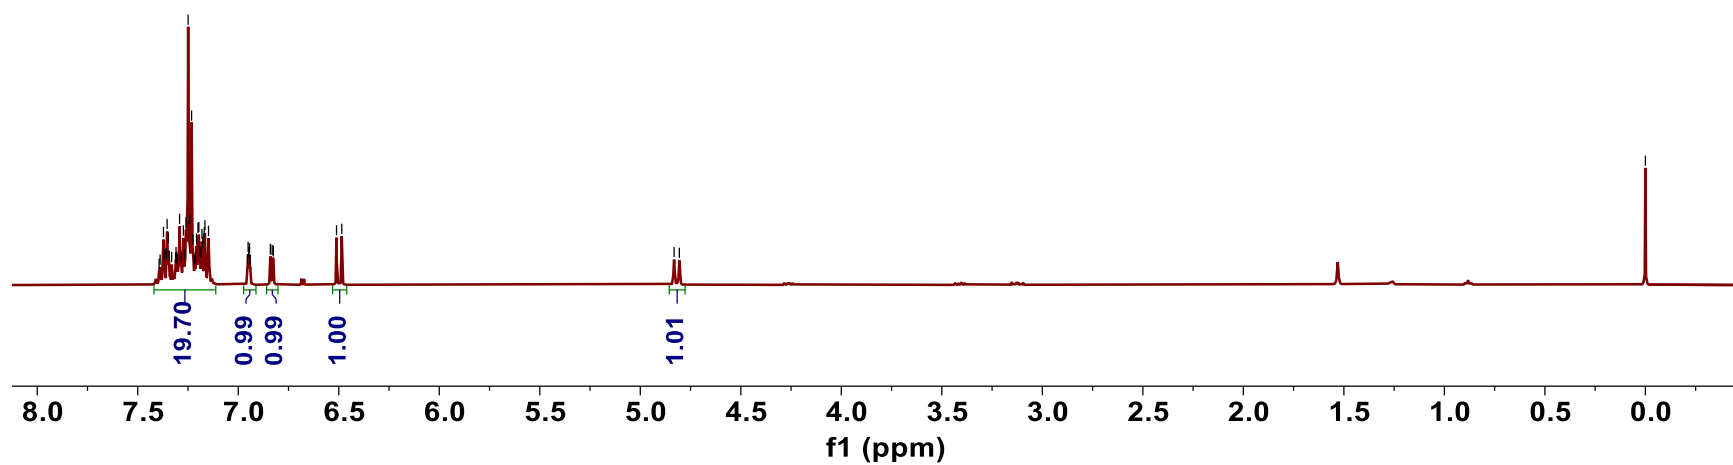



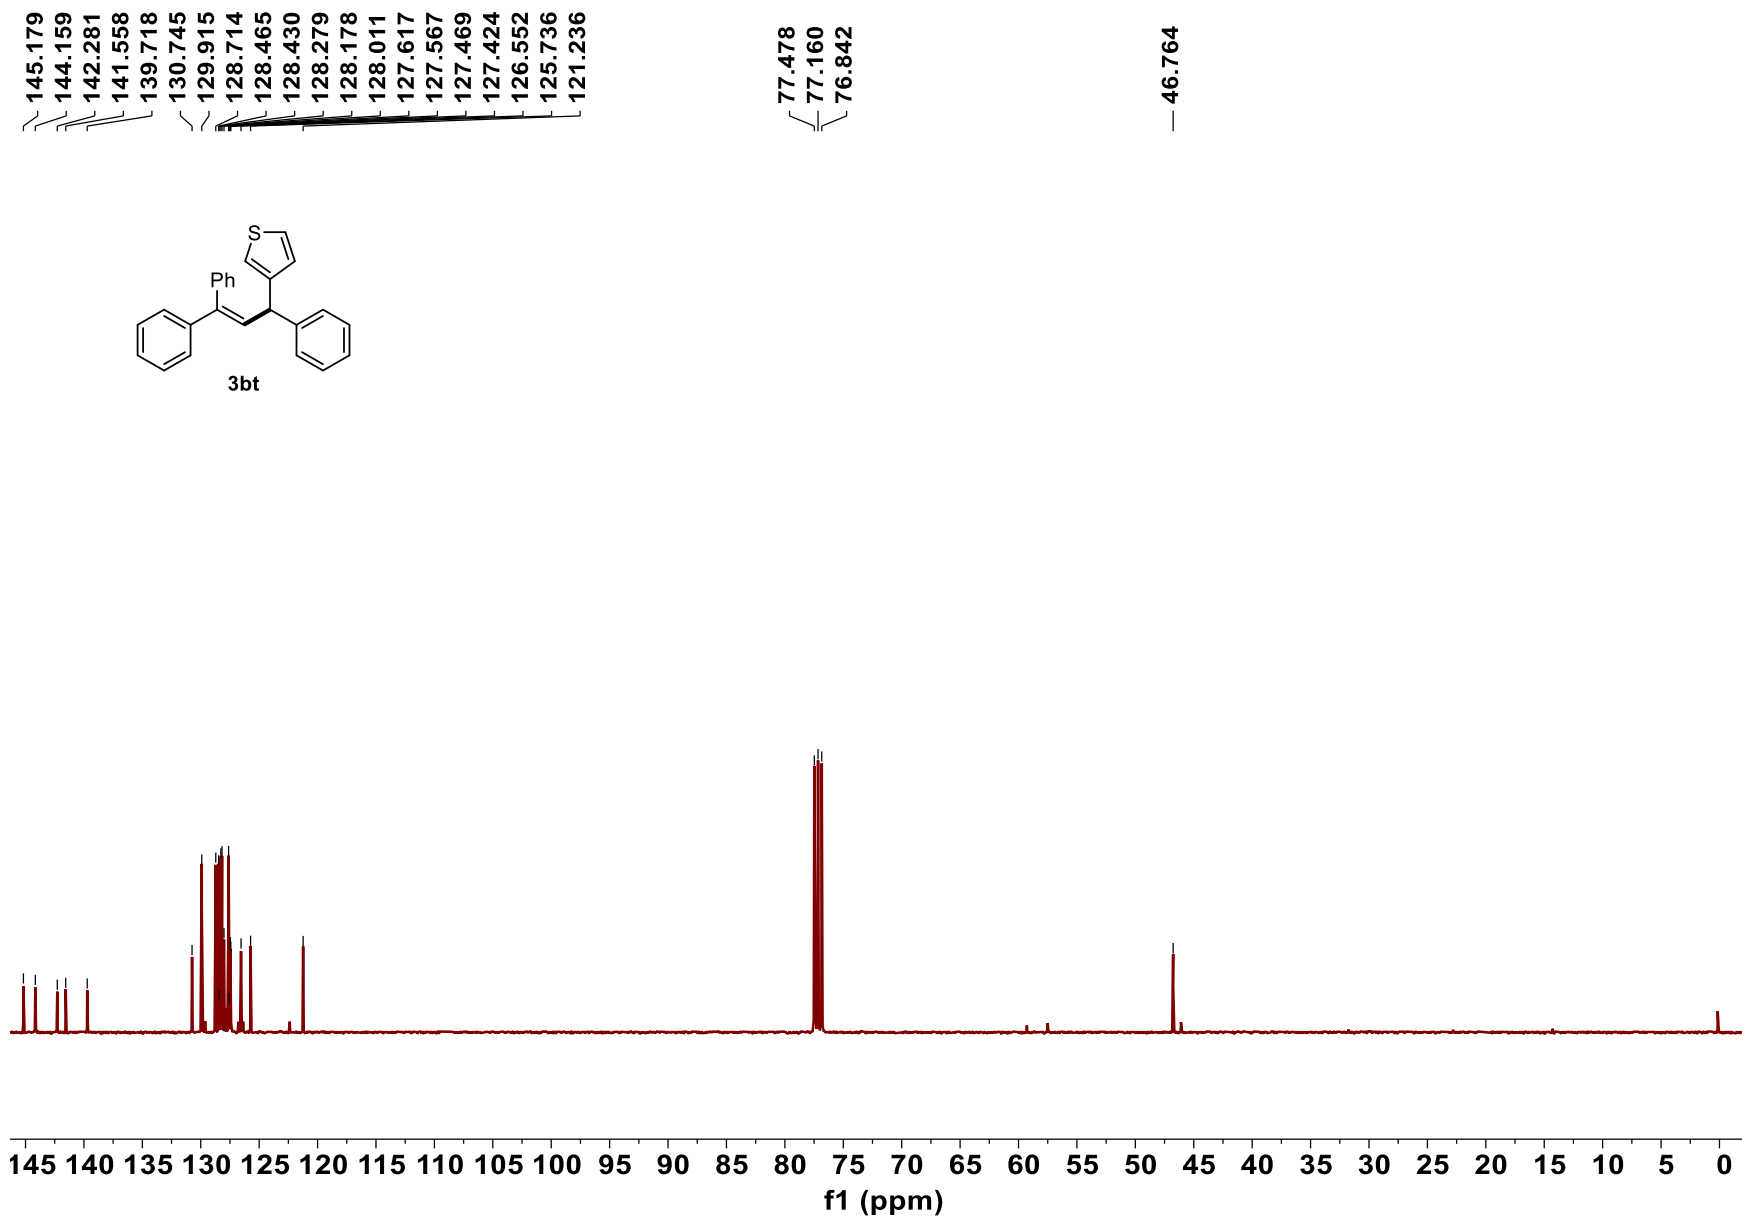



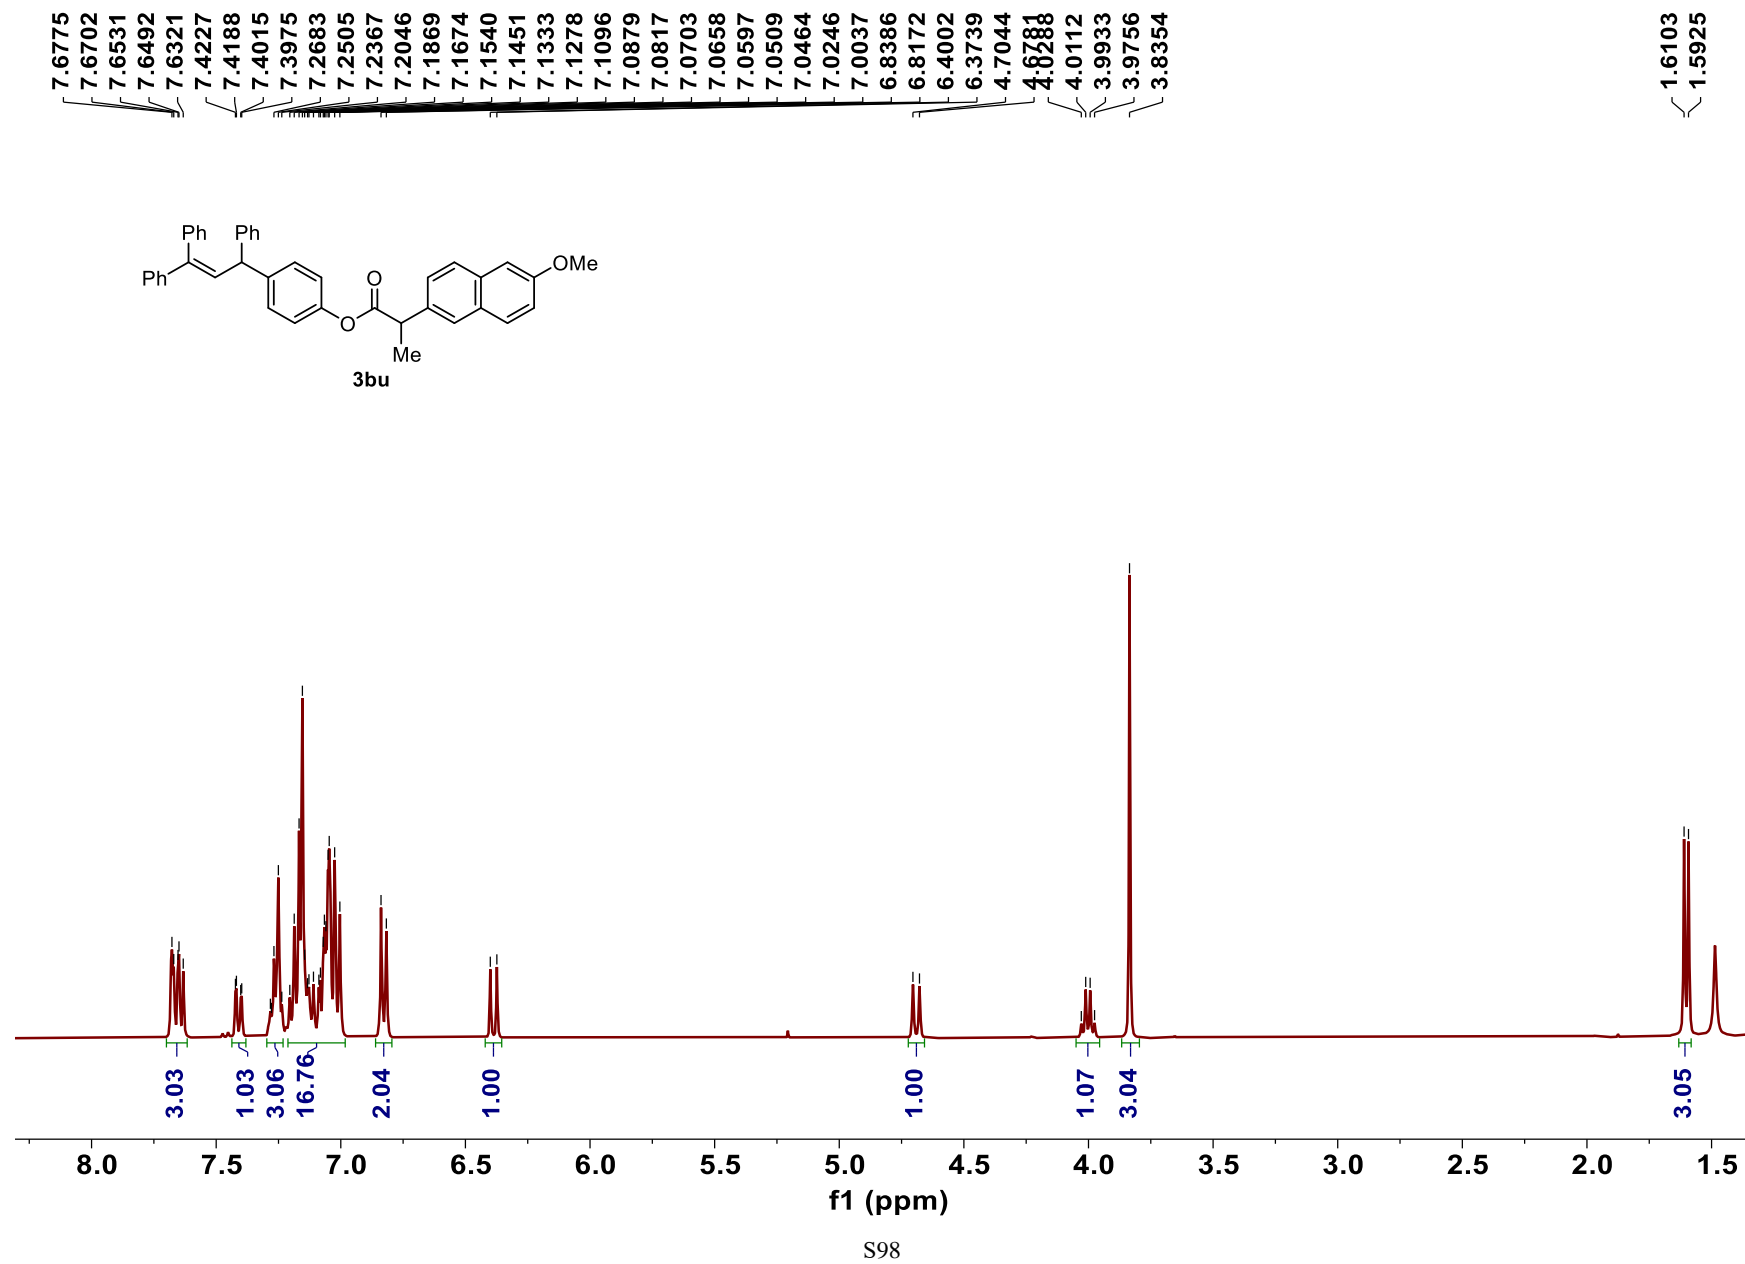



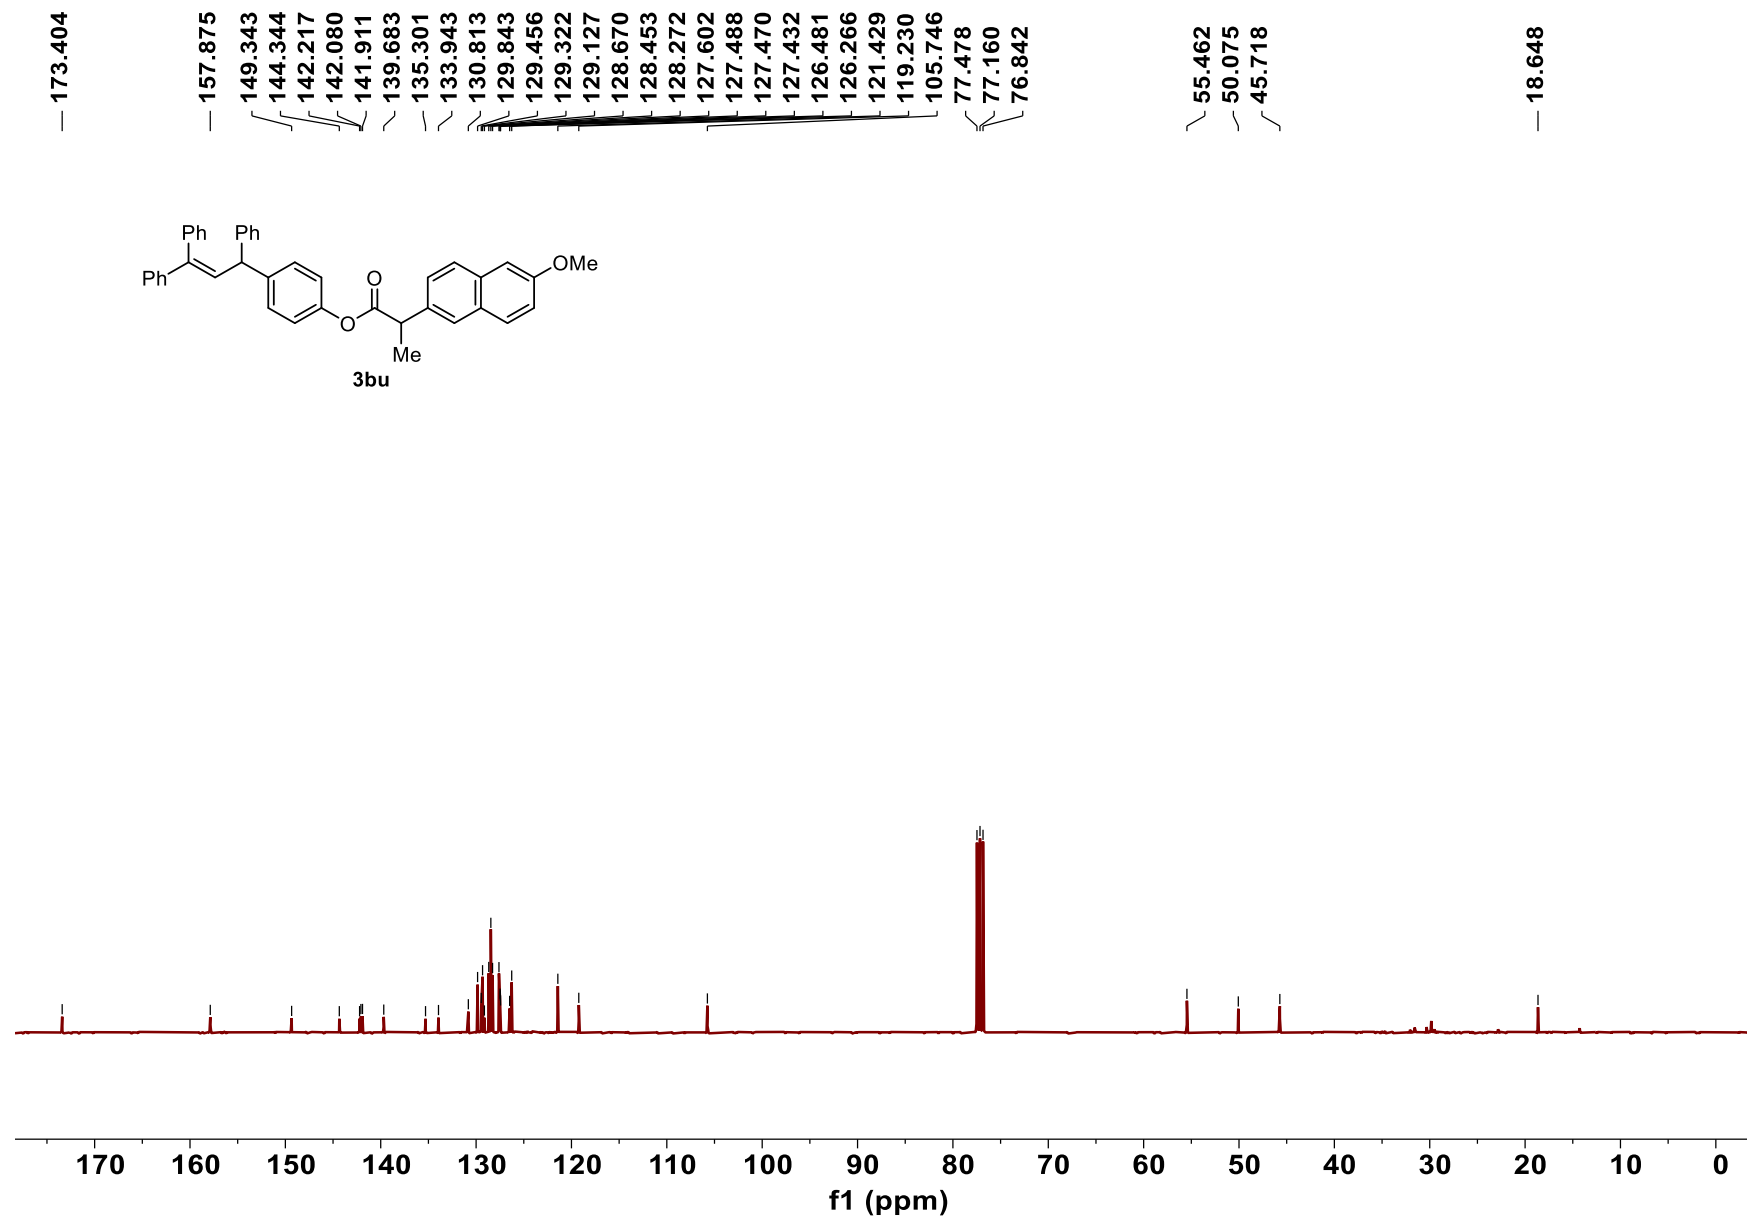



7.3895  
7.3738  
7.3322  
7.3119  
7.2769  
7.2523  
7.2321  
7.2126  
7.1906  
7.1871  
7.1724  
7.1528  
7.1326  
6.9636  
6.9434  
6.5249  
6.4986

4.8293  
4.8030

3.9821  
3.9650  
3.9474  
3.9301

2.5050  
2.4873

1.9256  
1.9089  
1.8922  
1.8754  
1.8590  
1.6381  
1.6205  
1.5917

0.9454  
0.9293

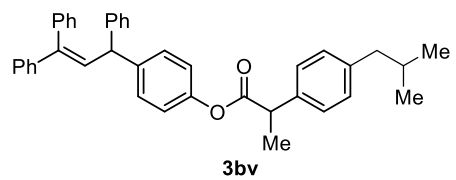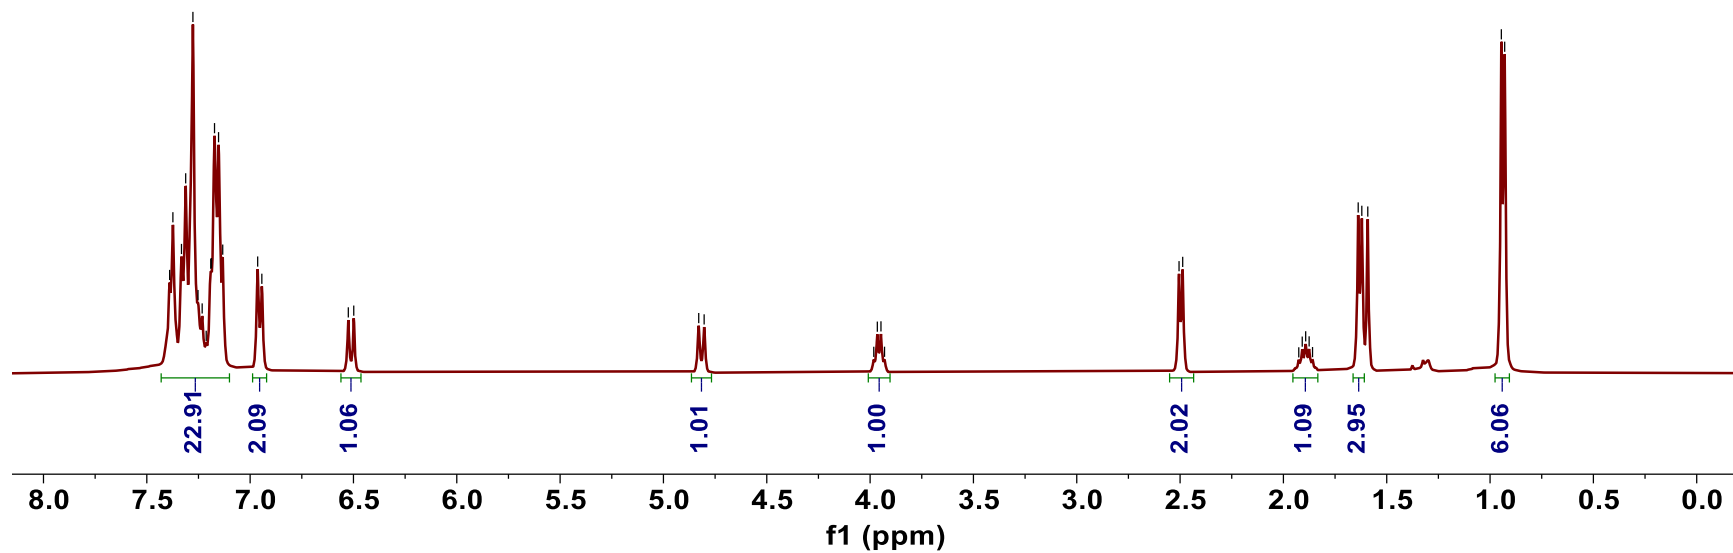

S100



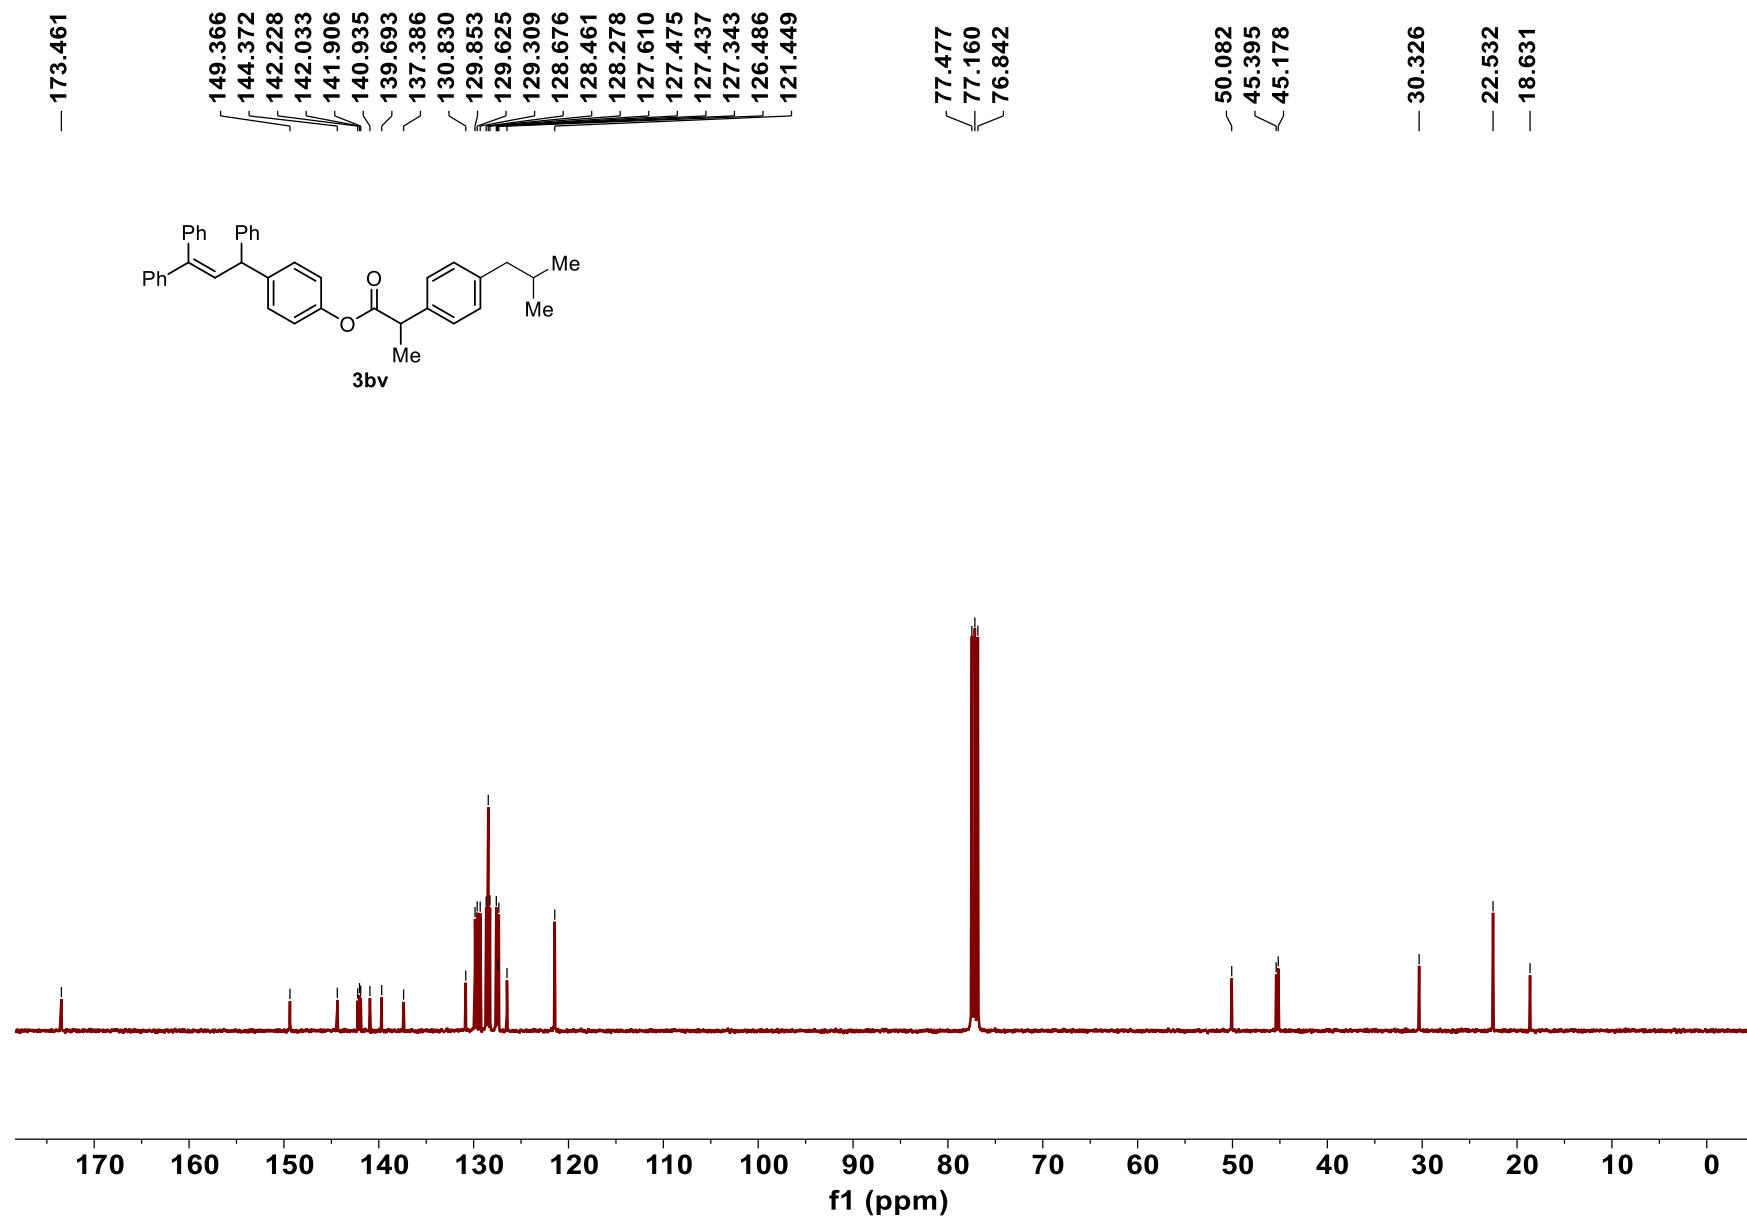



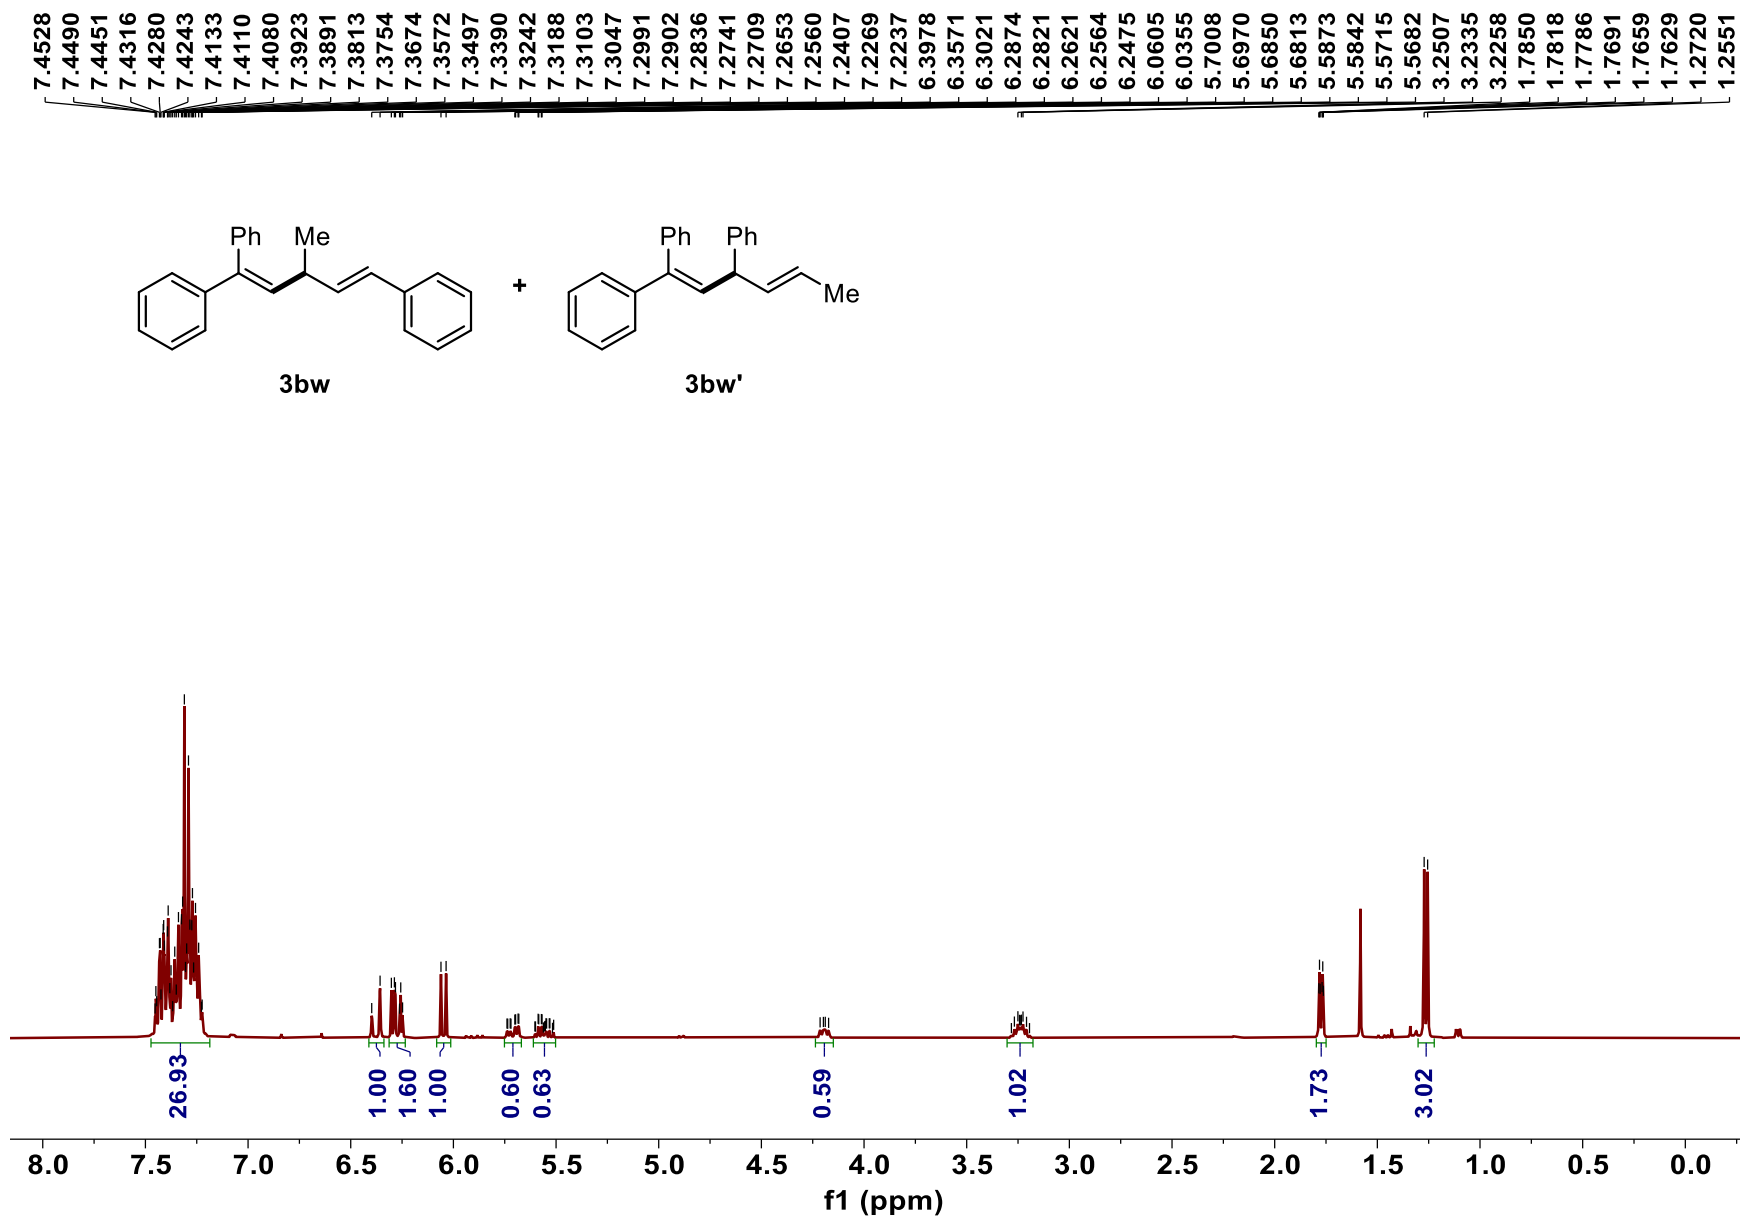



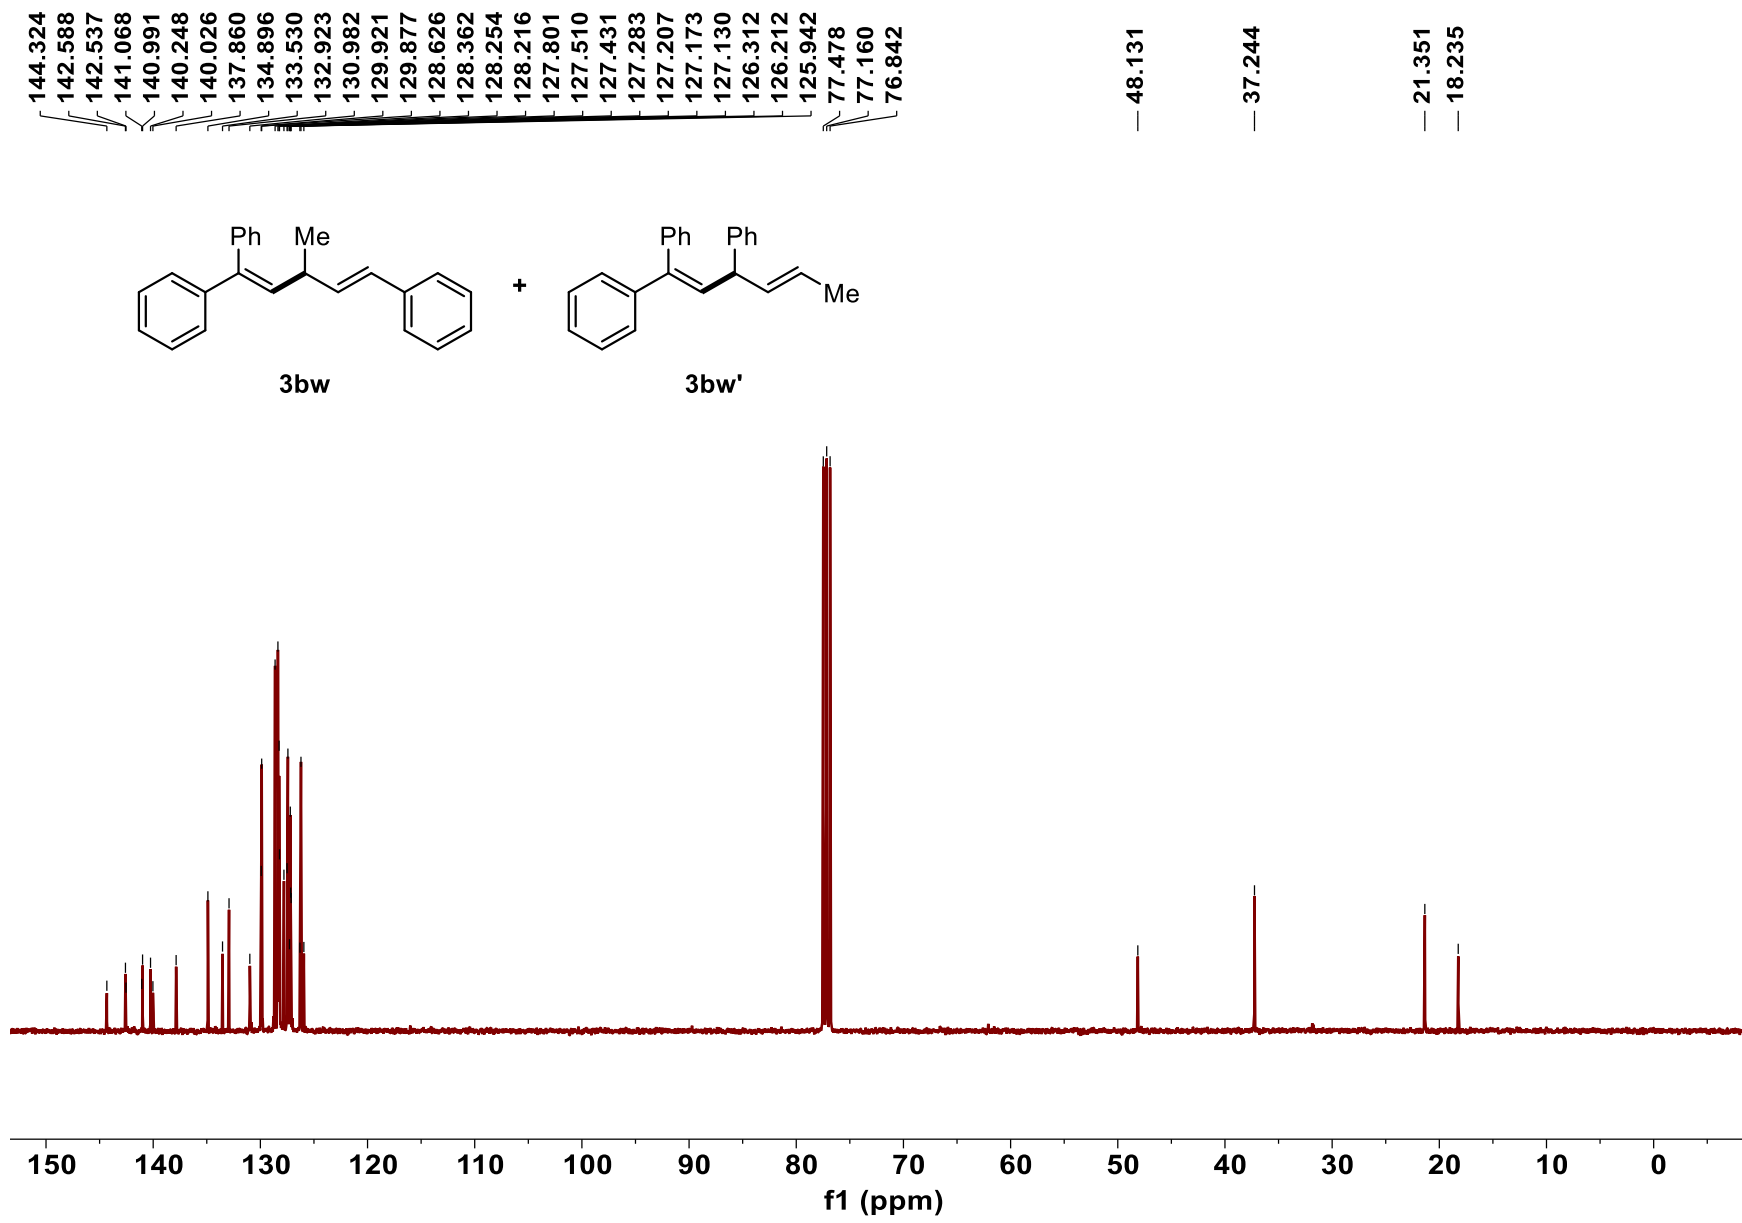



7.3327  
7.3159  
7.3114  
7.2973  
7.2882  
7.2699  
7.2550  
7.2378  
7.2192  
7.1960  
7.1848  
7.1760  
7.1714  
7.1575  
7.1416  
7.1329  
7.1150  
6.3530  
6.3429  
6.2410  
6.2155

4.2897  
4.2796  
4.2641  
4.2541

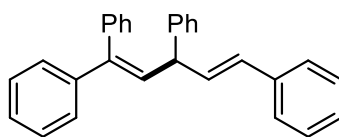

3bx

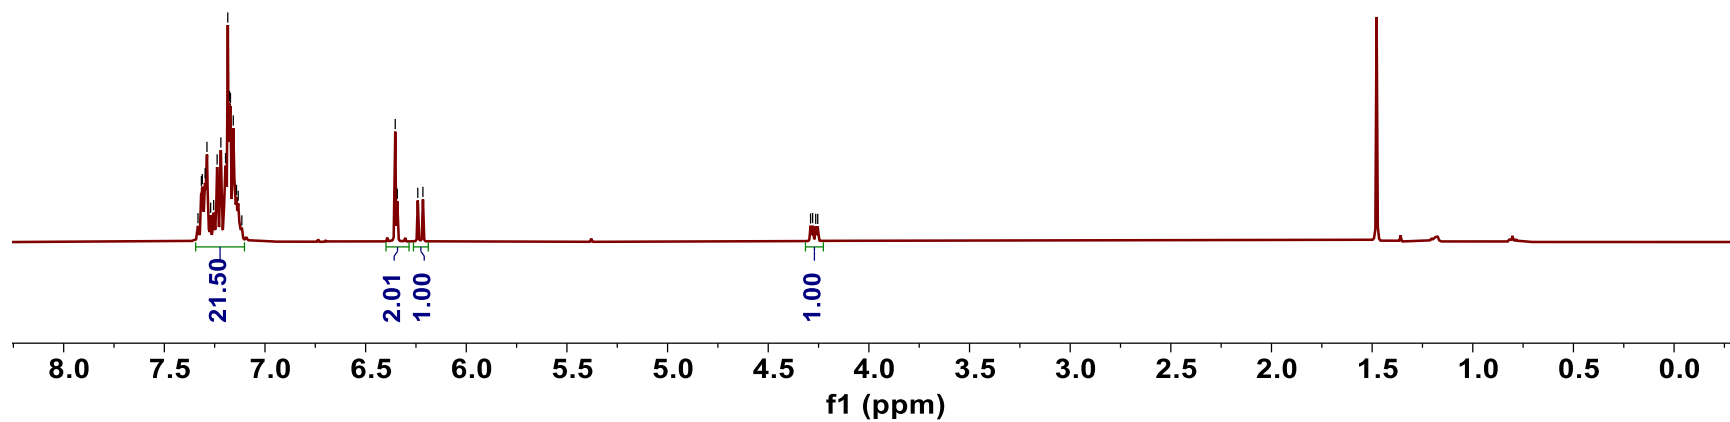



143.683  
142.345  
141.980  
139.893  
137.563  
132.546  
130.404  
129.988  
129.898  
128.786  
128.678  
128.469  
128.289  
127.945  
127.575  
127.452  
127.404  
126.607  
126.401

77.478  
77.160  
76.843

— 48.429

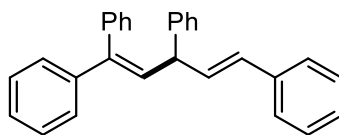

3bx

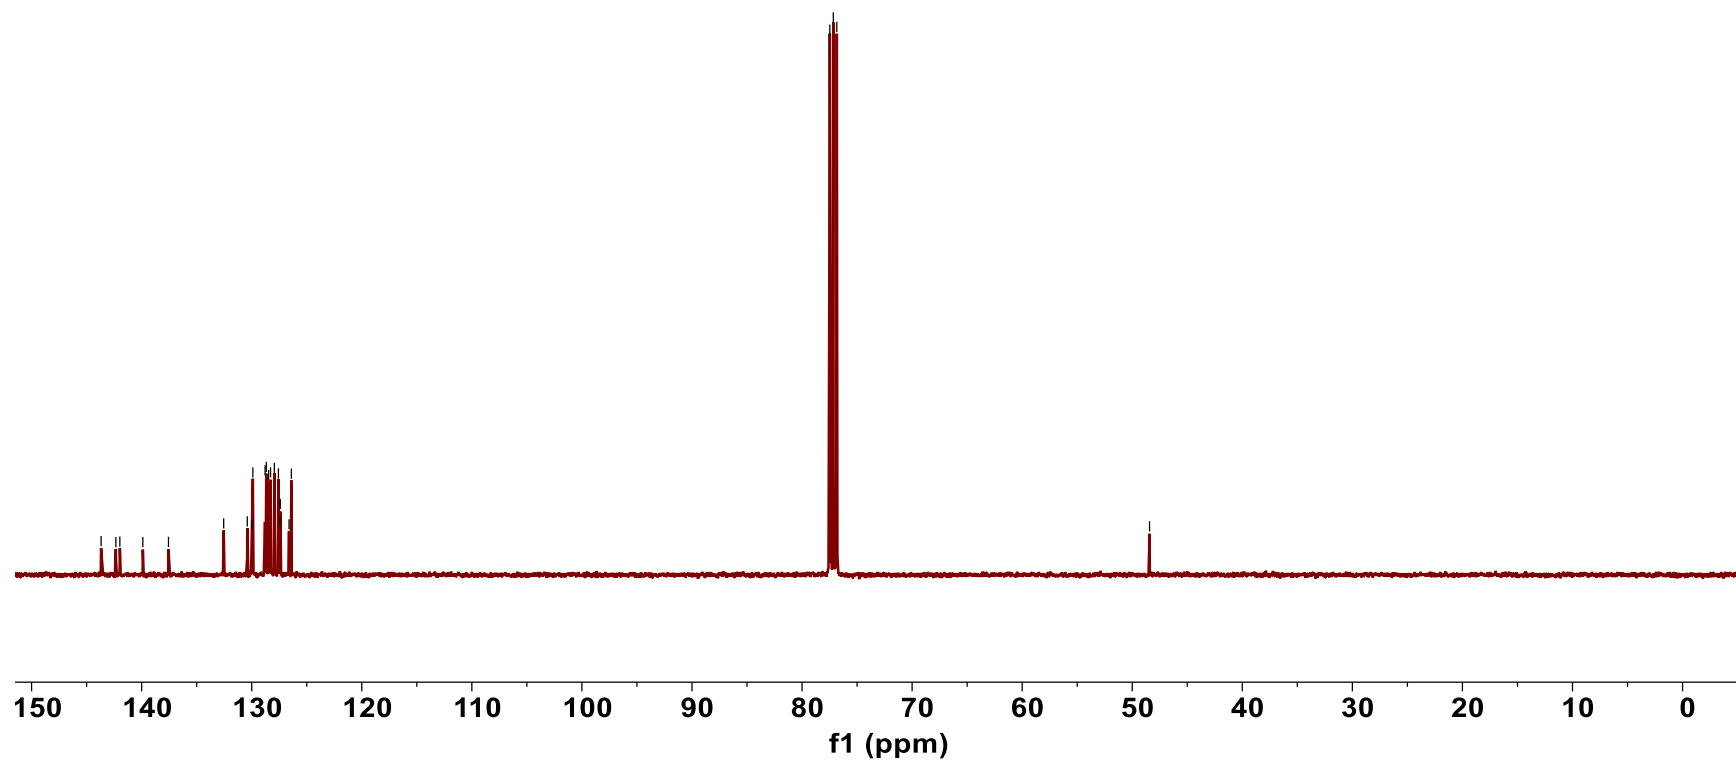

S105



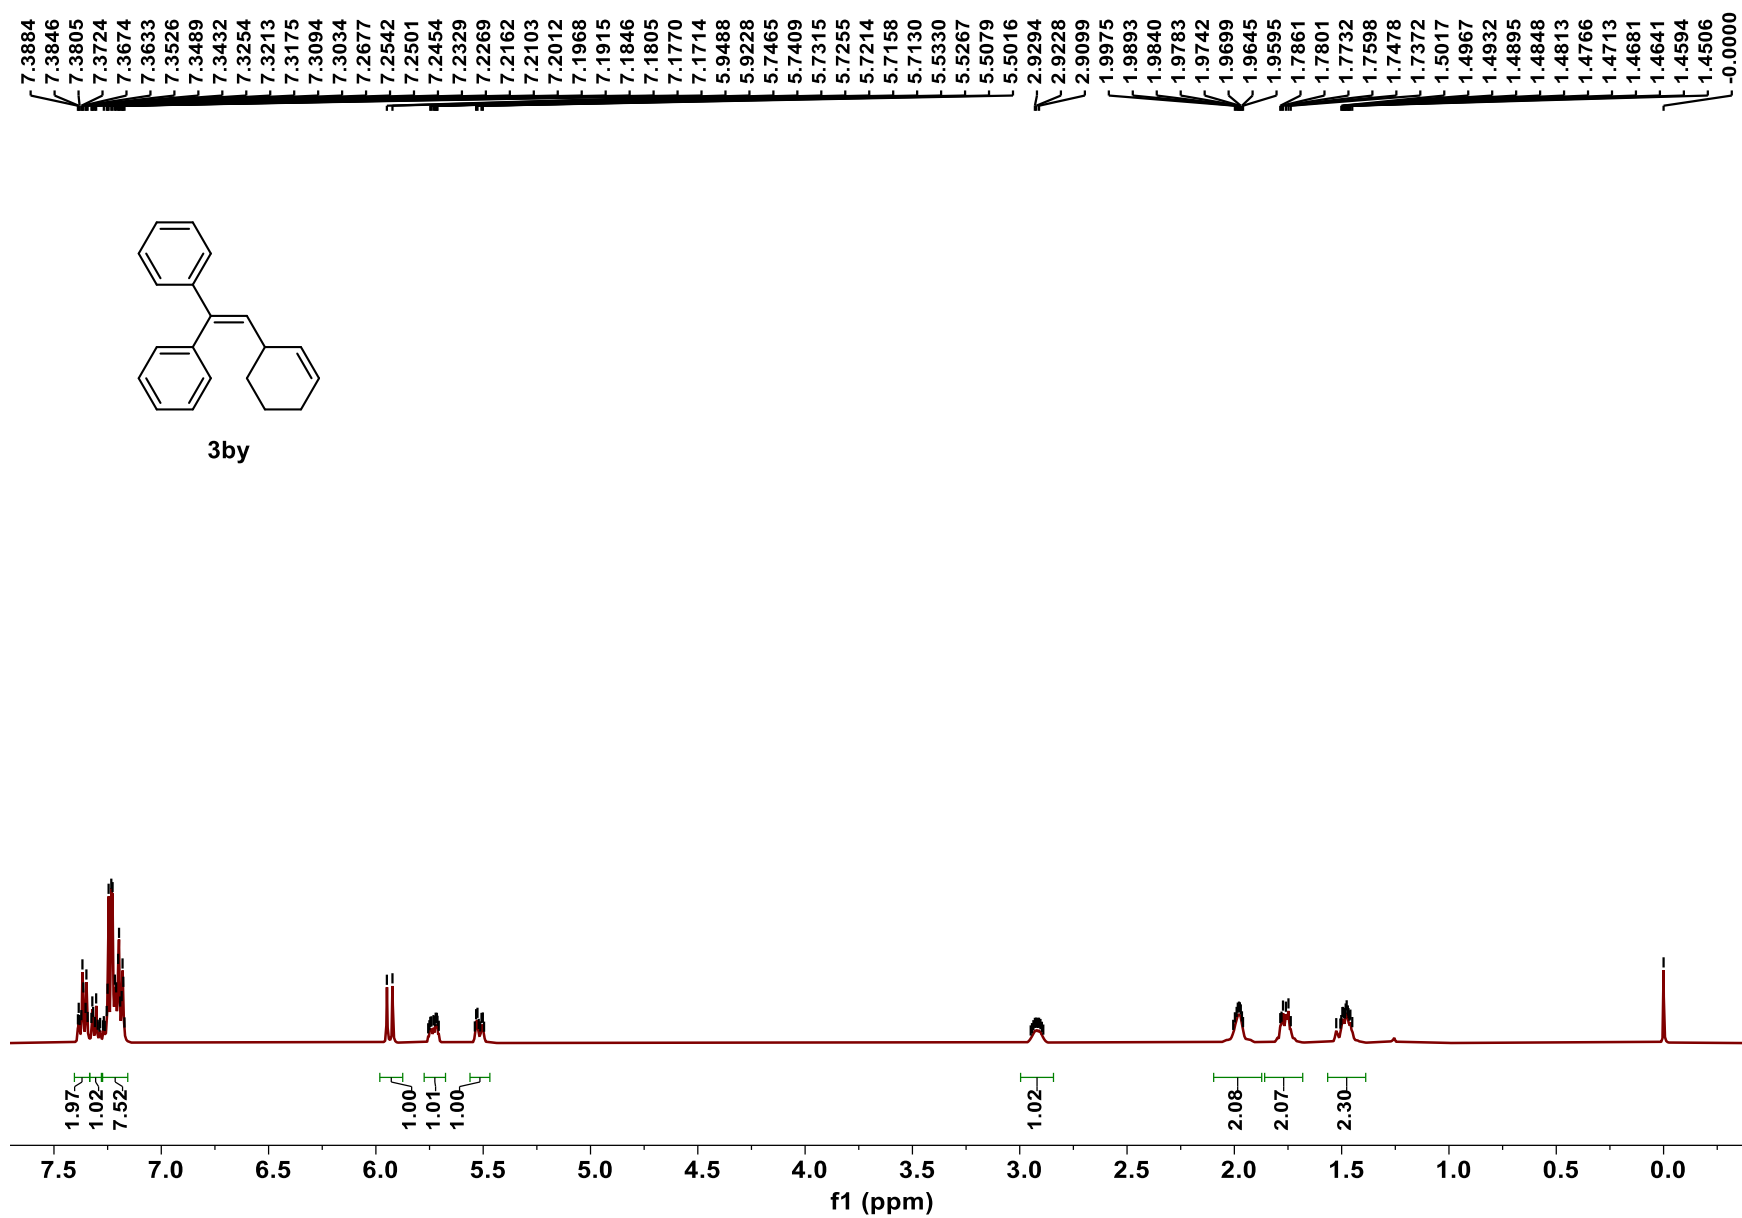



142.700  
140.896  
140.323  
133.817  
130.172  
129.949  
128.347  
128.199  
127.826  
127.341  
127.060  
127.018

77.479  
77.160  
76.841

36.124  
29.705  
24.994  
21.012

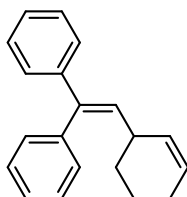

3by

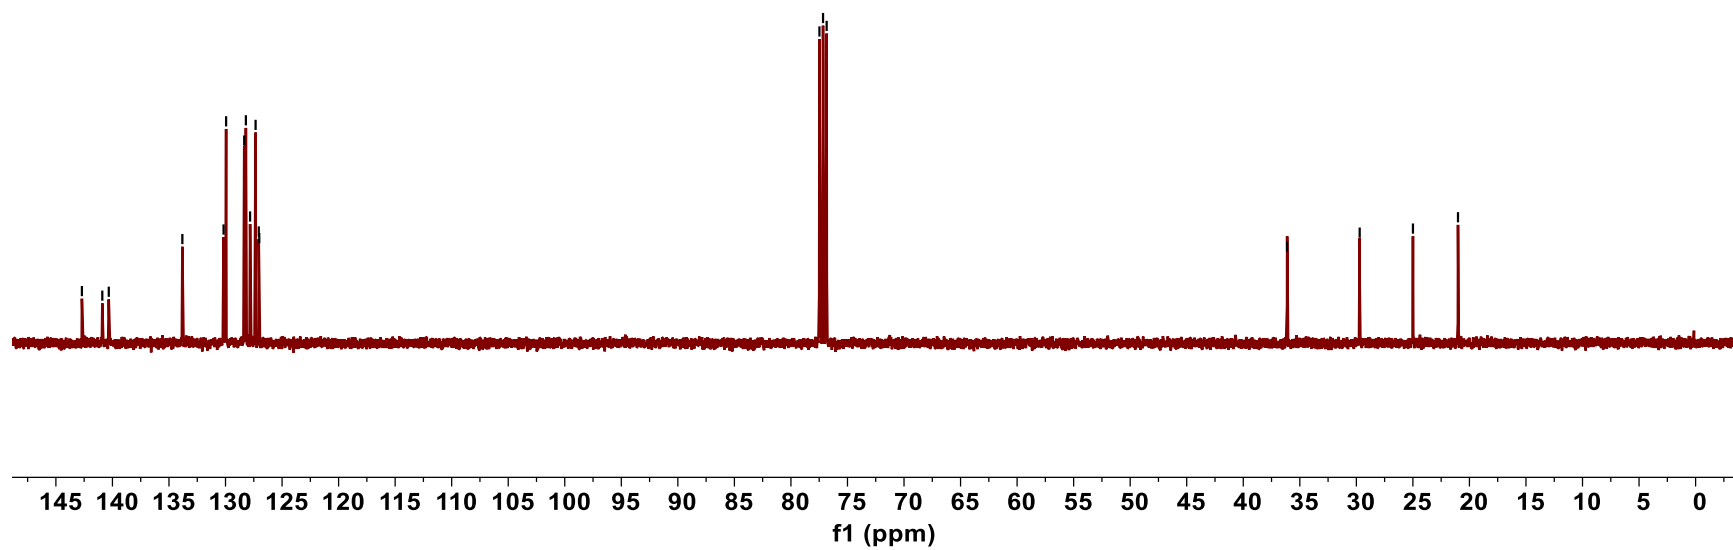



## ***S7. References***

1. G. Zhang, R.-X. Bai, C.-H. Li, C.-G. Feng, G.-Q. Lin, *Tetrahedron* **2019**, 75, 1658–1662.
2. W.-T. Wei, F. Teng, Y. Li, R.-J. Song, J.-H. Li, *Org. Lett.* **2019**, 21, 6285–6288.
3. K. Tanaka, M. Kishimoto, Y. Hoshino, K. Honda, *Tetrahedron Lett.* **2018**, 59, 1841–1845.
4. T.-J. Hu, G. Zhang, Y.-H. Chen, C.-G. Feng, G.-Q. Lin, *J. Am. Chem. Soc.* **2016**, 138, 2897–2900.
5. S. Liu, H. W. Gibson, *Tetrahedron Letters* **1994**, 35, 8533–8536.
6. C. C. Tyrol, N. S. Yone, C. F. Gallin, J. A. Byers, *Chem. Comm.* **2020**, 56, 14661–14664.
7. S. Auricchio, C. Magnani, A. M. Truscello, *Eur. J. Org. Chem.* **2002**, 2411–2416.
